1  
2  
3  
4  
5  
6  
7  
8  
9  
10  
11  
12  
13  
14  
15  
16  
17  
18  
19  
20  
21  
22  
23  
24  
25  
26  
27  
28  
29  
30  
31

**Characterization by Next Generation Sequencing Reveals the Molecular Mechanisms Driving the Faster Evolutionary rate of *Cassava brown streak virus* Compared with *Ugandan cassava brown streak virus***

Titus Alicai<sup>1</sup>, Joseph Ndunguru<sup>2</sup>, Peter Sseruwagi<sup>2</sup>, Fred Tairo<sup>2</sup>, Geoffrey Okao-Okuja<sup>1</sup>, Resty Nanvubya<sup>1</sup>, Lilliane Kiiza<sup>1</sup>, Laura Kubatko<sup>3</sup>, Monica A. Kehoe<sup>4</sup> and Laura M. Boykin<sup>5,\*</sup>

<sup>1</sup>National Crops Resources Research Institute, P.O. Box 7084, Kampala, Uganda

<sup>2</sup>Mikocheni Agricultural Research Institute, Coca cola Road, Box 6226, Dar es Salaam, Tanzania

<sup>3</sup>The Ohio State University, 154W 12<sup>th</sup> Avenue, Columbus, Ohio 43210, USA

<sup>4</sup>Crop Protection Branch, Department of Agriculture and Food, Western Australia, Bentley Delivery Centre, Perth, 6983, Western Australia, Australia.

<sup>5</sup> The University of Western Australia, ARC Centre of Excellence in Plant Energy Biology and School of Chemistry and Biochemistry, Crawley, Perth 6009, Western Australia, Australia.

\* Corresponding author: [laura.boykin@uwa.edu.au](mailto:laura.boykin@uwa.edu.au)

**Keywords:** cassava, Uganda, *Manihot esculenta*, smallholder farmer, *Cassava brown streak virus*, species tree estimation, SVD Quartets, nonsynonomous mutations

32 **Abstract**

33 Cassava is a major staple food for 800 million people. Cassava brown streak disease (CBSD), is  
34 caused by *Cassava brown streak virus* (CBSV) and *Ugandan cassava brown streak virus* (UCBSV)  
35 is suppressing cassava yields in East Africa at an alarming rate. Previous studies have  
36 documented CBSV is more devastating than UCBSV. This is because CBSV is harder to breed  
37 resistance for, causes more infections and yield losses in cassava, and its species delimitation is  
38 more challenging. We set out to characterize the CBSV and UCBSV whole genomes from the 26  
39 previously published genomes and three new from Uganda, using NGS data with the goal of  
40 uncovering genetic patterns that explain the observed biological differences. In this paper, we  
41 report phylogenetic relationships, rates of synonymous and non-synonymous substitutions, and  
42 whole genome-based evolutionary rates for CBSV and UCBSV. Using the whole genome  
43 sequences we produced the first coalescent based species tree estimation for CBSV and UCBSV  
44 which supports previously published studies pointing to multiple species of both CBSV and  
45 UCBSV. This new species framework led to the finding that CBSV has a faster rate of evolution  
46 when compared with UCBSV. The genes responsible for CBSV's rapid rate of evolution are NIa,  
47 6K2, NIb and P1. Furthermore, we have discovered that for CBSV, rates of nonsynonomous  
48 substitutions are more predominant than synonymous substitution and occur across the entire  
49 genome. All comparative analyses between CBSV and UCBSV presented suggests CBSV is  
50 outsmarting the cassava immune system, thus is more devastating and harder to control.

51

52

53

54

55

## 56 Introduction

57 Cassava (*Manihot esculenta* Crantz) is a major staple food crop for 800 million people in over  
58 100 tropical and sub-tropical countries <sup>1</sup>. In sub-Saharan Africa, it is the main source of dietary  
59 calories for approximately 300 million people <sup>2</sup>. The tuberous storage roots of cassava are rich  
60 in carbohydrates and can be cooked or processed for human food, animal feeds and a wide  
61 range of industrial products. The crop is relatively drought tolerant and can yield well even in  
62 less fertile soils, hence, its importance to poor families farming marginal lands <sup>3</sup>. Cultivation of  
63 cassava is most adversely affected by two viral diseases; cassava mosaic disease (CMD) and  
64 cassava brown streak disease (CBSD) <sup>4</sup>, which together were reported to cause production  
65 losses of more than US\$1 billion every year <sup>5</sup> in Africa.

66

67 Serious yield losses due to CMD were first observed on mainland East Africa in the 1920s <sup>6</sup>.  
68 Recorded epidemics of CMD later occurred in the 1930s, 1940s and from 1990s to date <sup>7,8</sup>. By  
69 contrast, for about 70 years since it was first described <sup>9</sup>, CBSD was confined to low altitudes  
70 (below 1000 meters above sea level) along coastal eastern Africa in Kenya, Tanzania and  
71 Mozambique. However, in the early 2000s, outbreaks of CBSD were reported over 1000 km  
72 inland at mid-altitude locations (above 1000m) in multiple countries all around Lake Victoria in  
73 Uganda <sup>10</sup>, western Kenya <sup>11</sup> and northern Tanzania <sup>4</sup>. Where it is already established in eastern  
74 Africa, the current CBSD epidemic prevails as the main cause of losses in cassava production.  
75 Over the last 10 years, the CBSD epidemic has expanded to other countries in East and Central  
76 Africa such as Rwanda, Burundi, Congo, DR Congo and South Sudan <sup>12-14</sup>. This has significantly  
77 increased the risk to countries in central and west Africa which are among the world's leading  
78 cassava producers, and where CBSD does not occur.

79

80 CBSD is caused by *Cassava brown streak virus* (CBSV) and *Ugandan cassava brown streak virus*  
81 (UCBSV). Both viruses are (+) ssRNA viruses in the genus *Ipomovirus* and family *Potyviridae*<sup>15-18</sup>,  
82 and are often together referred to as cassava brown streak viruses (CBSVs). The CBSVs have  
83 genomic organization of 10 segments, total size of approximately 8.9 to 10.8 kb, and coding for  
84 a polypeptide with about 2,900 amino acid residues<sup>15,17,18</sup>. The complete genome of a CBSD  
85 causal virus was first sequenced in 2009<sup>18</sup>, and to date there are only 26 publicly available<sup>19</sup>.  
86 Currently there are two species recognized by the ICTV, but Ndunguru et al.<sup>19</sup> have suggested  
87 further speciation in the UCBSV clade. Both viruses are transmitted in a semi-persistent manner  
88 by the whitefly *Bemisia tabaci*<sup>20</sup> and mechanically<sup>21</sup>. Symptoms of CBSD on cassava vary with  
89 cultivar, virus or plant age, but typically include leaf veinal chlorosis, brown stem lesions, as well  
90 as constrictions, fissures and necrosis of the tuberous storage roots<sup>22,23</sup>.

91

92 Although CBSD has become established in eastern Africa, there is limited knowledge on the  
93 diversity of causal viruses, their distribution and evolutionary potential. Therefore, it is  
94 necessary to obtain several full genome sequences of CBSD viral isolates, better understand the  
95 causal viruses and design long term control approaches for the disease.

96

97 In contrast to the growing knowledge on the causal agents of CBSD, host-pathogen interactions  
98 are less clear. As such, little is known about specific responses of different cassava varieties to  
99 prevailing species or strains of CBSD viral pathogens. Development and dissemination of CBSD-  
100 tolerant varieties has been the main means adopted for CBSD control in eastern Africa. With  
101 significant efforts geared at breeding for CBSD-resistant varieties, it is of great interest to know  
102 if such resistance protects cassava against one or both CBSVs. Such resistance may be  
103 expressed as several related features including restricted infection, systemic spread or recovery



104 of infected plants from disease and the possibility that stem cuttings taken from these may give  
105 rise to progeny that are virus-free (reversion). Recent studies have shown CBSV to be the more  
106 aggressive virus, infecting both tolerant and susceptible cultivars as single or mixed infections  
107 with UCBSV <sup>15,24,25</sup>. In contrast, tolerant varieties were infected with only CBSV, but free of  
108 UCBSV, suggesting their resistance to the latter. Compared with UCBSV, CBSV isolates have  
109 been reported to be more detectable, having higher infection rates by graft inoculation and  
110 inducing more severe symptoms <sup>26</sup>. It has also been shown that plants of CBSD tolerant or  
111 resistant cultivars graft-inoculated with UCBSV developed milder symptoms and a significantly  
112 higher proportion of the progenies were virus-free (reverted) compared to those infected with  
113 CBSV <sup>27</sup>. To date, the underlying reasons for this more aggressive nature of CBSV compared  
114 with UCBSV are not known.

115  
116 In this study, CBSV and UCBSV molecular diversity was investigated by using next generation  
117 sequencing to understand new complete genomes of three isolates from Uganda. The  
118 sequences obtained were analyzed to determine species composition, CBSV and UCBSV  
119 evolutionary rates, role of such changes in virus-host interactions, resulting into cassava cultivar  
120 susceptibility or resistance. We set out to answer the following questions:

- 121 1) How do the three new complete genomes from Uganda compare to those already  
122 published <sup>19</sup>?
- 123 2) Are CBSV and UCBSV distinct species and is there further speciation?
- 124 3) Why is CBSV more aggressive and harder to breed resistance for than UCBSV?

## 125 **Results**

### 127 **CBSD Field Symptoms Associated with CBSV and UCBSV Isolates**

128 Categorisation of CBSV foliar symptom distribution on symptomatic plants assessed revealed  
129 that the most frequently encountered type was LL - symptoms only on lower leaves (68.4%),  
130 followed by SW - systemic and on the whole plant (26.3%), and SL – systemic but localized  
131 (5.3%) (table 1). Based on CBSVs detected and CBSV leaf symptom severity scores for 57  
132 sampled plants, whereas the majority of plants infected by UCBSV alone as determined by RT-  
133 PCR had mild chlorosis (severity score 2), CBSV infections (single or mixture with UCBSV) tended  
134 to have moderate to severe symptoms (scores 3-4) in same proportion to those exhibiting score  
135 2 (fig. 1, table 1). Regarding the three isolates used here for whole genome sequencing, U8  
136 (UCBSV) was from a plant with CBSV score 3 and LL symptom type. Both CBSV isolates (U1 and  
137 U4) were from plants with severity scores 2 and 3, symptom types LL and SL, respectively.

138

### 139 **Next Generation Sequencing**

140 The three samples from Uganda produced raw reads ranging from 21,844,716 to 23,648,990.  
141 After trimming for quality using CLCGW, these numbers were reduced to 21,582,374 to  
142 23,373,606 (table 2). Following *de novo* assembly of the trimmed reads using CLCGW, the  
143 numbers of contigs produced were 621-1,008. The contigs of interest from *de novo* assembly  
144 were of lengths 2,214 to 8,954nt, with average coverage 24 to 366. After mapping to a  
145 reference genome in Geneious, the lengths of the consensus sequences were 8,893 to 9,563  
146 with average coverages of 25 to 393. The final sequences consisted of a consensus between  
147 the *de novo* and the mapped consensus with lengths of 8,700 to 8,748.

148

### 149 **Genomic Variability and Positive Selection**

150 The CBSV genomes included in this study were more variable when compared with those of  
151 UCBSV (supplementary figs. S1 and S2). Characterizing amino acid usage at each position in the

152 whole genome revealed that CBSV genomes have non-synonymous substitutions present across  
153 their entire genome (fig. 2), and predominating when compared to synonymous substitutions.  
154 In contrast, UCBSV had near equal non-synonymous and synonymous substitutions across the  
155 entire genome. Genes in the UCBSV genomes with non-synonymous substitutions at a higher  
156 frequency were; P1, NIb and HAM1 (fig. 2).

157  
158 CBSV had 68 positively selected sites and 66 negatively selected sites, UCBSV had zero  
159 positively selected sites (codons) and 558 negatively selected sites (table 3). Analyzed together  
160 there are 3 positively selected sites and 1383 negatively selected sites. The coat protein (CP) of  
161 CBSV had the highest number of positively selected sites (16) while 6K2 had zero.

162

### 163 **Rates of Evolution**

164 CBSV and UCBSV have different rates of evolution (table 4). We tested two hypothesis using  
165 CODEML. The null hypothesis tested was CBSV and UCBSV have equal rates of evolution while  
166 the null hypothesis was that CBSV and UCBSV have different rates of evolution (two omegas;  
167 model = 2). The Likelihood Ratio Test was used to test for significance if the difference in  
168 likelihood was greater than 3.84 (based on the Chi-squared distribution and one degree of  
169 freedom) we rejected the null hypothesis that the rates between CBSV and UCBSV are equal.

170

171 CBSV whole genome sequences showed it is evolving 5 times faster than UCBSV. The genes  
172 contributing to this accelerated rate of evolution for CBSV are NIa (D=29.95), followed by 6K2  
173 (D=6.74), NIb (D=5.18) and P1 (4.61) (table 4 and fig. 4). The transition/transversion ratios were  
174 also estimated using CODEML and show the 6K1 (19.6) and CP (13.2) genes have the highest  
175 estimates while the remaining 8 genes ranged from 5.05 – 9.93.

176

## 177 **Species Tree Estimation - SVDQ**

178 The species phylogeny (fig. 3) shows strong support for a split into two primary viral clades, one  
179 consisting of CBSV (fig. 3 clades A and B) and the other consisting of UCBSV (fig. 3 clades E-G),  
180 with 100% bootstrap support separating the two clades. Figure 3 shows clades labeled A–G  
181 which correspond to; 1) labels A-F from Ndunguru et al <sup>19</sup>, and 2) a new clade G defined in this  
182 study. Within the CBSV clade, there are several additional clades with 100% bootstrap support,  
183 including the two new CBSV whole genomes from Uganda (U1 and U4). These are the first CBSV  
184 whole genomes sequences from Uganda. The other CBSV grouping with 100% bootstrap  
185 support labeled B in Figure 3 contains 4 Tanzania samples KoR6, Tan 79, Tan 19 1 and Nal 07. In  
186 the UCBSV clade there are 6 nodes supported with a 100% bootstrap, including the new UCBSV  
187 whole genome added from this study (U8) which is sister to Kab 07 from Uganda. In addition,  
188 the CBSV clade had all samples from a given country grouping together while the UCBSV clade  
189 had monophyletic clades from different countries (the multi-colored lines in fig. 3).

190

## 191 **Comparison of Gene Trees to Species Tree**

192 Clades A and B, which partition the CBSV isolates into two groups, are consistently present with  
193 high support in all genes except HAM1 and CP (table 5). Clades D and G, which each consist of a  
194 pair of UCBSV isolates, have high support across all genes, while clades C and E have relatively  
195 high support across a majority of genes. Clade F is strongly supported by the CI gene, which is  
196 relatively long, but is not found in the phylogenetic tree estimated for any of the other genes.

197

198 The whole genome concatenated analysis using MrBayes shows strong support (posterior  
199 probability 1.0) for all clades (table 5). However, this analysis does not take into account the

200 possibility of variation in the evolutionary processes across the individual genes. The SVDQ  
201 analysis, on the other hand, uses a coalescent-based method to estimate the overall species  
202 tree, and properly accounts for variation in the evolutionary history for each gene. In viewing  
203 the bootstrap support values for each of the clades from the SVDQ analysis, we see that the  
204 level of support for each clade across the genome is more accurately represented by the  
205 corresponding bootstrap proportion. For example, clade F, which was found only in the  
206 phylogeny of the CI gene, shows a bootstrap proportion of 0.44 for the SVDQ analysis (as  
207 compared to 1.0 for the MrBayes concatenated analysis) (table 5). Similarly, the SVDQ analysis  
208 gives a bootstrap proportion of 0.87 for clade E, which showed posterior probabilities below 0.8  
209 for 3 of the 10 genes, as compared to a posterior probability of 1.0 for the concatenated  
210 analysis with MrBayes. All other clades are supported with bootstrap values of 1.0, consistent  
211 with the MrBayes analysis.

212

### 213 **Sliding Window SVD Score**

214 The SVD Score Sliding Window analysis (fig. 4) shows several interesting patterns. First, note  
215 that the gene boundaries track well with shifts in the magnitude of the SVD Score, indicating  
216 that individual genes are subject to specific evolutionary processes that vary from gene to gene.  
217 In particular, several genes show strong support for the primary CBSV/UCBSV split, as indicated  
218 by their low scores, while other genes show variation from this basic process, as indicated by  
219 increases in the scores. In addition, fig. 4 shows the test statistic associated with the hypothesis  
220 test of a shift in the rate of evolution between the two groups, with '\*' indicating that the rate  
221 difference between the two groups is statistically significant. It is readily apparent from the  
222 graph that genes that show strong support (low SVD Score) for the primary CBSV/UCBSV split  
223 also show strong evidence for statistically significant differences in evolutionary rate. These

224 results support the overall hypothesis that certain genes in CBSV have accelerated rates of  
225 evolution that contribute to the increased aggressiveness of the virus.

226

227

228

## 229 **Discussion**

230 In this study we analyzed the molecular mechanisms underlying the field and laboratory  
231 observations that CBSV more readily infects cassava plants and tends to display severe  
232 symptoms when compared with those infected with UCBSV. Our analyses included  
233 characterizing three new complete CBSV (2) and UCBSV (1) genomes, which were combined  
234 with the 26 previously published. Our major findings show further speciation of CBSV and  
235 UCBSV, a larger genetic landscape for CBSV, including many nonsynonymous sites, and that  
236 CBSV has a faster rate of evolution compared with UCBSV (table 4 and fig. 4).

237

### 238 **Genes with Accelerated Rates of Evolution in CBSV**

239 We have identified P1, 6K2, NIb and NIa as the genes with accelerated rates of evolution in  
240 CBSV. The function of P1 is as an RNA silencing suppressor (RSS), and there is also the  
241 suggestion that it may be involved in virion binding to the whitefly stylet via a “bridge”  
242 formation by a virus-encoded P1 protein for both CBSV and UCBSV. 6K2 is associated with  
243 cellular membrane and is responsible for systemic infection and viral long distance movement  
244 <sup>28</sup>. The NIb encodes for a nuclear inclusion polymerase and the NIA for a nuclear inclusion  
245 protease <sup>18,29</sup>.

246

247 In Potyviruses generally, when NIa and VPg are associated together they are located in the  
248 cytoplasm and nucleus of infected cells. When 6K2-VPg-NIa forms a larger product, the VPg  
249 plays a role in viral RNA replication <sup>30</sup>. Even though VPg is not one of the genes with a higher  
250 evolution rate, both 6K2 and NIa are a part of the complex which affects replication, and this  
251 may go some way to explaining their apparent accelerated evolution rate. Is it possible that the

252 accelerated rates of evolution for genes involved in replication could even be a response to the  
253 relatively recent interaction of the viruses and cassava? These viruses are not present in South  
254 America where cassava originates so the viruses must be native to Africa. It would appear that  
255 the adaptation is still occurring and the cassava immune system does not know how to fight  
256 these infections yet. Cassava was introduced to East Africa in the 18<sup>th</sup> century through oceanic  
257 movement. The first reports of brown streak disease in Tanzania occurred 1936<sup>9,13</sup>. There has  
258 been little opportunity for the co-evolution of the viruses and the host, therefore a natural  
259 resistance would be hard prospect. This raises the possibility of the original host of these  
260 viruses, a non-cassava host which may be harboring these viruses or the most recent common  
261 ancestor of these viruses. This in turn leads us to wonder just how old these viruses and their  
262 ancestors are, and the best way to answer that is to sequence more virus genomes from both  
263 cassava and non-cassava hosts wherever they are found.

264

### 265 How Can CBSV Still Function with Such a Large Genetic Landscape?

266 CBSV and UCBSV have different evolutionary patterns as observed by characterizing the whole  
267 genome sequences of CBSV and UCBSV separately. CBSV is genetically more diverse when  
268 compared with UCBSV, as evident by the greater amino acid usage (supplementary fig. 1), the  
269 faster rates of evolution across the entire genome (table 4), and greater number of  
270 nonsynonymous sites across the entire genome (Figure 2). How can CBSV still function with  
271 such a large genetic landscape? RNA viruses walk a very fine line of having the genetic arsenal  
272 to overcome the host immune system and diverging to a point that key functions of genes are  
273 lost<sup>31</sup>. Recent studies<sup>32,33</sup> have shown that viruses with a large genetic landscape adapt to host  
274 changes much quicker and can overcome the host immune system faster. Viruses that occupy a  
275 large portion of the possible sequence space might be less fit but they outcompete the fitter



276 strain when the host immune system shifts and hence these viruses have been described as  
277 adapted to “survival of the flattest”<sup>34,35</sup>. This means that a virus that covers the most sequence  
278 space will be able to adapt to host immune system faster than those with smaller spaces.  
279 Viruses that are adapted in this category (“survival of the flattest”) are going to be harder to  
280 breed resistance for because the virus has a larger ability to adapt to changes. It is clear that in  
281 our case, CBSV is the virus that has a larger sequence space (Supplemental Figure 1) when  
282 compared to that of UCBSV, which is clearly smaller (Supplemental Figure 2). CBSV is one of the  
283 RNA viruses that can be described as adapted to “survival of the flattest”, while UCBSV is not.  
284 Therefore, CBSV is more devastating because it has a larger genetic arsenal which it uses  
285 overcome the changes breeders are introducing into cassava.

286

287 Not only are the CBSV genomes more genetically diverse, but are also characterized by a large  
288 number of nonsynonymous changes in the genome (Figure 2). An excess of nonsynonymous over  
289 synonymous substitutions at individual amino acid sites signifies that positive selection has  
290 affected the evolution of a protein between the extant sequences under study and their most  
291 recent common ancestor<sup>36</sup>. Positive selection is the process by which new advantageous  
292 genetic variants sweep a population and is the mechanism Darwin described to drive evolution.  
293 This is further evidence that CBSV has a greater capacity to evade the cassava immune system  
294 as compared with UCBSV. CBSV had 66 sites under positive selection (Table 4) while UCBSV had  
295 none. The CBSV sites under positive selection are found not only in the regions that have gained  
296 the most attention, CP and HAM1-like<sup>13</sup>, but are also found in all other genes except 6K2. This  
297 is further support for CBSV’s ability to outsmart the cassava immune system. Every gene in the  
298 CBSV genome (except 6K2) has sites under positive selection indicating effective RNA silencing  
299 of the virus will need to encompass many loci.

300

301 Using computational methods combined with field observations we have concluded that CBSV  
302 is more devastating than UCBSV. This assertion is also supported by two recent biological  
303 studies. The first was a test of reversion in three different cassava varieties (Albert, Kaleso and  
304 Kiroba) infected with CBSV and UCBSV. Reversion is a type of resistance mechanism where by  
305 virus-infected plants will naturally recover from infection over time, and their progeny from  
306 stem cuttings are virus-free. A reversion event infers the host immune system was able to clear  
307 or restrict the virus from systemic movement. It was shown that UCBSV infected cassava had a  
308 higher rate of reversion when compared to plants infected with CBSV <sup>27</sup> indicating the plants  
309 infected with UCBSV recovered more often than those infected with CBSV. This is another line  
310 of evidence that CBSV is more devastating and the cassava immune systems of the three  
311 varieties tested are struggling to resist the virus.

312

313 The second study that supports the hypothesis that CBSV is more aggressive than UCBSV  
314 analyzed virus-derived small RNAs within three cassava varieties (NASE 3, TME204 and 60444).  
315 Plants infected with viruses are known to trigger RNAi antiviral defense that can be measured  
316 by quantifying the abundance of 21-24 nucleotide (nt) segments produced by the dicer enzyme  
317 <sup>37</sup>. Cassava varieties were infected with either CBSV or UCBSV, NGS was used to detect virus-  
318 derived small RNAs <sup>24</sup>, and the 21-24 nt dicer fragments were mapped to either CBSV or UCBSV  
319 depending on which virus was used to infect the plant. The results showed that CBSV infection  
320 triggered a stronger immune response as measured by greater abundance of virus derived  
321 small RNA fragments across the entire CBSV genome compared with UCBSV. In addition, across  
322 all three genotypes they observed that cassava grafted with CBSV-infected buds showed more  
323 severe symptoms compared to UCBSV-infected plants <sup>24</sup>. This is further evidence that CBSV is a

324 more aggressive virus and breeding for resistance to CBSV and UCBSV will require different  
325 experimental approaches.

326

### 327 **Implications of the Species Tree for CBSV and UCBSV**

328 We have produced the first species tree estimation of the CBSV causal virus species using whole  
329 genome sequences and the coalescent based SVD Quartets species tree estimation algorithm.

330 Differences in the evolutionary history of the two viruses are seen in the branching patterns in

331 Figure 3. CBSV has diverged into two main clades A and B, while UCBSV has several well

332 supported clades but the backbone is still unresolved, indicating more sampling is needed to

333 fully understand the diversity and evolutionary history of UCBSV. The species tree (Figure 3) is

334 similar to the concatenated whole gene tree reported in Ndunguru et al. <sup>19</sup>, except addition of

335 the clade labeled “G”, and lack of support for clades E and F in the UCBSV species. It is well

336 documented that concatenating genes without using the coalescent based models can produce

337 misleading results <sup>38,39</sup>. In our case, only CI supports clade F, and it is also the longest gene

338 (1,883 bp), therefore swamps signals of other genes. The whole genome concatenation

339 recovers clade F with a posterior probability of 1.00 (Table 4). With regards to clade E, the

340 SVDQ tree was more reflective of the individual gene tree signal by producing a bootstrap value

341 of 0.87 versus 1.00 for the whole genome concatenated tree (Table 4). These results suggest

342 that the topology in the UCBSV species will change as more samples are added.

343

344 Our integrative approach of species tree estimation coupled with analyzing rates of evolution

345 has lead to a new framework for CBSV and UCBSV, which includes analyzing and treating these

346 two groups of viruses as separate species. Multiple putative species of both CBSV and UCBV

347 have been identified which means cassava needs to be resistant to the virus species that are

348 prevalent if farmers' fields. We argue that this genomic diversity and faster rate is what is  
349 causing the breeders to struggle with breeding resistant varieties and also why the diagnostic  
350 primers are not working consistently. CBSV also has more positively selected sites than UCBSV.  
351 It was first thought that CBSV was restricted to the coastal areas and below 1000 m<sup>23</sup> but as  
352 more genetic data is gathered CBSV and UCBSV are found at all elevations in many ecozones  
353 throughout East Africa<sup>4,10,13,15,19,40</sup>. We are still in the discovery phase with CBSV and UCBSV  
354 species as there are only 29 (now with the three new included here) whole genome sequences  
355 and other new species of both viruses are likely to be discovered. As we move forward it is  
356 important to include all known samples and use appropriate species tree estimation methods  
357 such as SVDQ.

358

359 Finally, the traditional gene regions (CP and HAM1-like) used to delimit species and are the  
360 targets for diagnostic primers do not recover the species tree (Table 4). We recommend  
361 designing new diagnostic regions for other genes that recover the species tree and also do not  
362 have an accelerated rate of molecular evolution (Figure 4), such as CI or P3 for species level  
363 diagnoses. It is possible that the spread of CBSV and UCBSV could have been exacerbated  
364 through dissemination of infected cuttings, as virus indexing with primers targeting CP may  
365 have misleadingly returned negative results.

366

### 367 **Implications of the Results for Cassava Breeding**

368 During the last three decades worldwide, agricultural production has been compromised by a  
369 series of epidemics caused by new variants of classic viruses that show new pathogenic and  
370 epidemiological properties. An important determinant of the fitness of a virus in a given host is  
371 its ability to overcome the defenses of the host. Overcoming plant resistance by changes in the

372 pathogenicity of viral populations represents a specific and important case of emergence, with  
373 tremendous economic consequences since it jeopardizes the success and durability of  
374 resistance factors in crops as an anti-viral control strategy. In this study, we found CBSV to be  
375 more variable, have more positively selected sites and evolving five times faster than UCBSV.  
376 These findings have huge implications for cassava improvement efforts in Africa where CBSV is  
377 widely present. Field and laboratory results have proven CBSV to be more virulent and more  
378 devastating than UCBSV. Knowledge of specific virus species an improved cassava variety is  
379 resistant to will determine where to screen, multiply and deploy such varieties. Cassava  
380 breeders have to take into consideration the evolutionary and biological differences between  
381 CBSV and UCBSV in the breeding programs. For example, cassava breeders can breed varieties  
382 that are resistant to CBSV that can be strategically deployed in areas where CBSV is more  
383 prevalent, and similarly for UCBSV. Furthermore, it becomes more appropriate to always screen  
384 cassava materials against CBSV as a minimum, even if UCBSV is the more prevalent virus. Such  
385 strategy will in effect ensure durable resistance as opposed to the indiscriminate screening and  
386 distribution of the improved CBSV resistant cassava varieties, without knowledge of the virus  
387 species in the area.

## 388 389 **Methods**

### 390 **Field Plant Sample Collection**

391 Farmers' fields in Uganda with cassava plants 3-6 months old were surveyed for CBSV in 20  
392 districts. In each field, cassava plants were visually assessed to confirm typical CBSV symptoms  
393 on leaves and stems. CBSV leaf symptom severity was scored on a 1-5 scale<sup>41,42</sup>; 1 = no visible  
394 symptoms, 2 = mild vein yellowing or chlorotic blotches on some leaves, 3 =  
395 pronounced/extensive vein yellowing or chlorotic blotches on leaves, but no lesions or streaks

396 on stems, 4 = pronounced/extensive vein yellowing or chlorotic blotches on leaves and mild  
397 lesions or streaks on stems, 5 = pronounced/extensive vein yellowing or chlorotic blotches on  
398 leaves and severe lesions or streaks on stems, defoliation and dieback. CBSD symptoms were  
399 also categorized based on distribution of leaf chlorosis and stem lesions on the plant; systemic  
400 and on the whole plant (SW), systemic on leaf or stem parts but localized (SL), only on lower  
401 leaves (LL). On selected symptomatic plants, portions of the third fully expanded leaf on a shoot  
402 were picked as samples, air-dried by pressing between sheets of newsprint and stored pending  
403 RNA extraction.

404

#### 405 **RNA Extraction**

406 About 0.25 g cassava leaf samples were frozen in liquid nitrogen, then ground using a mortar  
407 and pestle. 2 ml CTAB lysis buffer (2% CTAB; 100 mM Tris-HCl, pH 8.0; 20 mM EDTA; 1.4 M NaCl;  
408 1% sodium sulphite; 2% PVP) was added and samples homogenized. The 1 ml of the  
409 homogenate was incubated at 65°C for 15 min, an equal volume of chloroform: isoamyl alcohol  
410 (24:1) was added, and the sample was centrifuged for 10 min at approximately 14,500rpm.  
411 800µl of the aqueous layer was transferred to a new tube with an equal volume of 4 M LiCl and  
412 incubated at -20°C for 2 hrs. The samples were centrifuged for 25 min at 14,500 rpm and the  
413 supernatant was poured off. The pelleted RNA was re-suspended in 200 µl TE buffer containing  
414 1% SDS, 100 µl of 5M NaCl. 300 µl of ice-cold isopropanol were added and incubated at -20°C  
415 for 30 min. The sample was centrifuged at 13,000 rpm for 10 min and the aqueous layer was  
416 decanted and RNA pellets washed in 500 µl of 70% ethanol by centrifuging at 13,000 rpm for 5  
417 min. The ethanol was decanted off and RNA pellet dried to remove residual ethanol. The RNA  
418 was re-suspended in 50 µl nuclease-free water and stored at -80 °C prior to testing.

419

## 420 **CBSV and UCBSV Detection by RT-PCR**

421 All samples were tested for presence of CBSV and UCBSV by a two-step RT-PCR assay<sup>43</sup>. The  
422 PCR mixture consisted of 16.0 µl nuclease free water, 2.5 µl PCR buffer, 2.5 µl MgCl<sub>2</sub> (2.5 mM),  
423 0.5µl dNTPs (10 mM), 1.0 µl of each primer (10mM) [forward CBSDDF2 5'-  
424 GCTMGAAATGCYGGRTAYACAA-3' and reverse CBSDDR 5'-GGATATGGAGAAAGRKCTCC-3'], 0.5  
425 µl Taq DNA polymerase and 1.0 µl of cDNA. The PCR thermo profile consisted of: 94°C for 2 min  
426 followed by 35cycles of 94°C (30 s), 51°C (30 s) and 72°C (30 s) for denaturation, annealing and  
427 extension, respectively. PCR products were analysed by electrophoresis in a x1 TAE buffer on a  
428 1.2% agarose gel, stained with ethidium bromide, visualized under UV light and photographed  
429 using a digital camera.

430

## 431 **Sample Selection for Sequencing**

432 From the data obtained in the diagnostic tests, samples for sequencing were selected to  
433 represent different geographical regions, symptom types and severities. Three samples that  
434 tested positive for either CBSV (2) or UCBSV (1) were selected for this study. The two samples  
435 for which presence of CBSV was confirmed (U1 and U4) had been collected from different  
436 farmer's fields in Mukono district, central Uganda. The sample with UCBSV (U8) selected for  
437 further analysis originated was collected from a field in Mayuge district, eastern Uganda.

438

## 439 **Generation of the Transcriptomes**

440 The three samples were transported to the laboratory and extracted as detailed above. Total  
441 RNA was blotted on to FTA cards and later extracted using methods previously described<sup>44</sup>.  
442 Total RNA from each sample was sent to the Australian Genome Research Facility (AGRF) for

443 library preparation and barcoding before 100 bp paired-end sequencing on an Illumina  
444 HiSeq2000.

445

#### 446 **De novo Sequence Assembly and Mapping**

447 For each sample, reads were first trimmed using CLC Genomics Workbench 6.5 (CLCGW) with  
448 the quality scores limit set to 0.01, maximum number of ambiguities to two and removing any  
449 reads with <30 nucleotides (nt). Contigs were assembled using the *de novo* assembly function  
450 of CLCGW with automatic word size, automatic bubble size, minimum contig length 500,  
451 mismatch cost two, insertion cost three, deletion cost three, length fraction 0.5 and similarity  
452 fraction 0.9. Contigs were sorted by length and the longest subjected to a BLAST search (blastn  
453 and blastx)<sup>45</sup>. In addition, reads were also imported into Geneious 6.1.6<sup>46</sup> and provided with  
454 reference sequences obtained from Genbank (KR108828 for CBSV and KR108836 for UCBSV).  
455 Mapping was performed with minimum overlap 10%, minimum overlap identity 80%, allow  
456 gaps 10% and fine tuning set to iterate up to 10 times. A consensus between the contig of  
457 interest from CLCGW and the consensus from mapping in Geneious was created in Geneious by  
458 alignment with MAFFT<sup>47</sup>. Open reading frames (ORFs) were predicted and annotations made  
459 using Geneious. Finalized sequences were designated as “complete” based on comparison with  
460 the reference sequences used in the mapping process, and “coding complete” if some of the 5’  
461 or 3’ UTR was missing but the coding region was intact<sup>48,49</sup>, and entered into the European  
462 Nucleotide Archive (WEBIN ID number Hx2000053576).

463

#### 464 **Genome Alignment and Annotation**

465 Twenty-six whole genomes (12 CBSV and 14 UCBSV) were downloaded from GenBank and  
466 imported into Geneious<sup>46</sup>, and the MAFFT plugin<sup>47</sup> was used to align them with the 3 new



467 whole genome sequences obtained in this study. Nucleotide alignments were translated into  
468 protein using the translate align option in Geneious and then visually inspected for quality.  
469 Annotations were transferred to the 3 new genomes from the 26 previously published genomes  
470 using the live annotation option in Geneious.

471

## 472 **Characterizing the Genetic Diversity in CBSV and UCBSV Genomes**

473 CBSV and UCBSV are distinct species (Figure 2) therefore the genomes were treated separately  
474 in the analyses in characterizing the genomes. Characterizing the genetic diversity of CBSV and  
475 UCBSV was done using the Synonymous Non-synonymous Analysis Program (SNAP v2.1.1)  
476 implemented in the Los Alamos National Laboratory HIV-sequence database  
477 (<http://www.hiv.lanl.gov>)<sup>50</sup>. SNAP calculates synonymous and non-synonymous substitution  
478 rates based on a set of codon-aligned nucleotide sequences. This program is based on the  
479 simple methods for estimating the numbers of synonymous and nonsynonymous nucleotide  
480 substitutions of<sup>51</sup>, and incorporating a statistic developed for computing variances and  
481 covariances of dS's and dN's<sup>52</sup>. An application of the SNAP package in HIV-1 research has also  
482 been developed<sup>53</sup>.

483

## 484 **Estimating Rates of Evolution**

485 To further characterize the CBSV and UCBSV genomes, we estimated the rates of molecular  
486 evolution using CODEML implemented in PAML (Phylogenetic Analysis by Maximum Likelihood)  
487<sup>54</sup>. PAML is a package of programs for analysis of DNA or protein sequences by using maximum  
488 likelihood methods in a phylogenetic framework. The null hypothesis tested was CBSV and  
489 UCBSV have equal rates of evolution (one omega; model = 0) while the alternative hypothesis  
490 was that CBSV and UCBSV have different rates of evolution (two omegas; model = 2). The

491 Likelihood Ratio Test was used to test for significance if the difference in likelihood was greater  
492 than 3.84 (based on the Chi-squared distribution and one degree of freedom) we then rejected  
493 the null hypothesis that the rates between CBSV and UCBSV are equal. Initial analyses were  
494 carried out for the entire genome and showed CBSV has a higher rate of evolution (Table 4;  
495 Figure 4). To identify which gene or genes were contributing to the faster rate of evolution we  
496 analyzed the individual genes separately testing the hypotheses and parameters utilized for the  
497 complete genome.

498

#### 499 **Testing for Positive Selection**

500 Sites under positive selection were identified using SLAC<sup>55</sup> implemented on the  
501 <http://www.datamonkey.org> web server<sup>56</sup>. The settings used to run SLAC were as follows: the  
502 best fitting model (GTR) was specified global dN/dS value was estimated and the significance  
503 level was set to 0.01.

504

#### 505 **Gene Tree Estimation**

506 Individual gene trees were estimated using MrBayes 3.2.1<sup>57</sup> run in parallel on Magnus (Pawsey  
507 Supercomputing Centre, Perth, Western Australia) utilizing the BEAGLE library<sup>58</sup>. MrBayes 3.2.1  
508 was run utilizing 4 chains for 30 million generations and trees were sampled every 1000  
509 generations. All runs reached a plateau in likelihood score, which was indicated by the  
510 standard deviation of split frequencies (0.0015), and the potential scale reduction factor (PSRF)  
511 was close to one, indicating the MCMC chains converged.

512

#### 513 **Species Tree Estimation**

514 The SVDQ method<sup>59</sup> implemented in PAUP\*<sup>60</sup> was used to analyze the whole-genome data.  
515 This method allows analysis of multi-locus data in a coalescent framework that allows for  
516 variation in the phylogenetic histories of individual genes. The method was run with all possible  
517 quartets (23,751) sampled in each of 100 bootstrap replicates, and the consensus across all  
518 bootstrap replicates was used as the estimate of the species tree. Bootstrap support values for  
519 each node were used to quantify uncertainty in the species tree estimate. The entire analysis  
520 took approximately 2.5 minutes on a MacBook Pro running OSX 10.11.2 with a 2.2 GHz Intel  
521 Core i7 processor.

522

### 523 **Comparison of Gene Trees to Species Tree**

524 We compared the single-gene phylogenies constructed using MrBayes with the overall species  
525 tree phylogeny estimated using SVDQ and the concatenated phylogeny estimated by MrBayes.  
526 For each tree, we evaluated presence or absence of the clades identified by Ndunguru et al.<sup>19</sup>  
527 labeled A-F in Figure 3. We identified an additional clade (clade G, Figure 3) that we noticed to  
528 be consistently present across genes and methods. For each of these clades present in a  
529 particular tree, we recorded the posterior probability (for trees constructed by MrBayes) or the  
530 bootstrap proportion (for the tree estimated by SVDQ) in Table 5.

531

### 532 **Sliding Window SVD Score**

533 The SVD Score<sup>61</sup> was used to quantify support for two viral clades for portions of the genome in  
534 a sliding window analysis. Briefly, the SVD Score measures the extent to which the data support  
535 a phylogenetic “split” – a division of the taxa into two groups with specified group membership.  
536 Low values of the SVD Score indicate strong support for the split of interest, while larger values  
537 indicate *either* a lack of support for the split or a shift in the underlying evolutionary process

538 (see Allman et al. (2016) for details and examples). We computed the SVD Score with the split  
539 defined by CBSV vs. UCBSV across the genome in windows of 500 bp, sliding in increments of  
540 100 bp, and plotted the resulting SVD Scores across the genome, with boundaries between  
541 genes marked with vertical lines. The computations took less than one minute on a MacBook  
542 Pro running OSX 10.11.2 with a 2.2 GHz Intel Core i7 processor.

543

544

## 545 **Acknowledgments**

546 This work was supported by the Bill and Melinda Gates Foundation Grant no. 51466 “Regional  
547 Cassava Virus Diseases Diagnostic Project” awarded to Mikochei Agricultural Research  
548 Institute, Tanzania, and sub-grant to National Agricultural Research Organisation (Uganda).  
549 Computational resources provided by the Pawsey Supercomputing Centre with funding from  
550 the Australian Government and the Government of Western Australia supported this work.

551

## 552 **Conflict of Interest**

553 The authors declare that they have no conflicts of interest with the contents of this article.

554

## 555 **References**

556

557 1 Thresh, J. M. Control of tropical plant virus diseases. *Adv Virus Res* **67**, 245-295,  
558 doi:10.1016/S0065-3527(06)67007-3 (2006).

559 2 Nweke, F. I. A Cash Crop in Africa. COSCA Working Paper No. 14. Collaborative Study of  
560 Cassava in Africa, International Institute of Tropical Agriculture, Ibadan, Nigeria.  
561 (1996).

562 3 Robertson, A. I. & Ruhode, T. The potential advantages of cassava over hybrid maize as  
563 a food security crop and a cash crop in the Southern Africa semi-arid zone. *African*  
564 *Crop Science Crop Science Conference Proceedings* **5**, 539-542 (2001).

565 4 Legg, J. P. *et al.* Comparing the regional epidemiology of the cassava mosaic and  
566 cassava brown streak virus pandemics in Africa. *Virus Res* **159**, 161-170,  
567 doi:10.1016/j.virusres.2011.04.018 (2011).

568 5 Legg, J. P., Owor, B., Sseruwagi, P. & Ndunguru, J. Cassava mosaic virus disease in East  
569 and Central Africa: epidemiology and management of a regional pandemic. *Adv Virus*  
570 *Res* **67**, 355-418, doi:10.1016/S0065-3527(06)67010-3 (2006).

- 571 6 Hall, F. W. Annual Report of the Department of Agriculture, Uganda. *Government*  
572 *Printer, Entebbe*, 35 (1928).
- 573 7 Jameson, J. D. Cassava mosaic disease in Uganda. *East African Agricultural and Forestry*  
574 *Journal* **29**, 208-213 (1964).
- 575 8 Otim-Nape, G. W. *et al.* The current pandemic of cassava mosaic virus disease in East  
576 Africa and its control. *NARO/NRI/DFID Publication. Chatham, UK. 100pp* (2000).
- 577 9 Storey, H. H. Virus diseases of East African plants: VI, A progress report of studies of  
578 the diseases of cassava. *East African Agricultural Journal* **2**, 34-39 (1936).
- 579 10 Alicai, T. *et al.* Re-emergence of cassava brown streak disease in Uganda. *Plant Disease*  
580 **91**, 24-29 (2007).
- 581 11 Ntawuruhunga, P. & Legg, J. P. New Spread of Cassava Brown Streak Virus Disease and  
582 Its Implications for The Movement of Cassava Germplasm in The East and Central  
583 African Region. International Institute of Tropical Agriculture-Uganda & Eastern Africa  
584 Root Crops Research Network Report. (2007).
- 585 12 Bigirimana, S., Barumbanze, P., Ndayihanzamaso, P., Shirima, R. & Legg, J. P. First  
586 report of cassava brown streak disease and associated Ugandan cassava brown streak  
587 virus in Burundi. *New Disease Reports* **24**, 26 (2011).
- 588 13 Mbanzibwa, D. R. *et al.* Evolution of cassava brown streak disease-associated viruses. *J*  
589 *Gen Virol* **92**, 974-987, doi:10.1099/vir.0.026922-0 (2011).
- 590 14 Mulimbi, W. *et al.* First report of Ugandan cassava brown streak virus on cassava in  
591 Democratic Republic of Congo. *New Disease Reports* **26** (2012).
- 592 15 Winter, S. *et al.* Analysis of cassava brown streak viruses reveals the presence of  
593 distinct virus species causing cassava brown streak disease in East Africa. *J Gen Virol*  
594 **91**, 1365-1372, doi:10.1099/vir.0.014688-0 (2010).
- 595 16 Monger, W. A., Seal, S., Isaac, A. M. & Foster, G. D. Molecular characterization of  
596 cassava brown streak virus coat protein. *Plant Pathol* **50**, 527-534 (2001).

- 597 17 Monger, W. A. *et al.* The complete genome sequence of the Tanzanian strain of  
598 Cassava brown streak virus and comparison with the Ugandan strain sequence. *Arch*  
599 *Viro* **155**, 429-433, doi:10.1007/s00705-009-0581-8 (2010).
- 600 18 Mbanzibwa, D. R. *et al.* Genetically distinct strains of Cassava brown streak virus in the  
601 Lake Victoria basin and the Indian Ocean coastal area of East Africa. *Arch Virol* **154**,  
602 353-359, doi:10.1007/s00705-008-0301-9 (2009).
- 603 19 Ndunguru, J. *et al.* Analyses of Twelve New Whole Genome Sequences of Cassava  
604 Brown Streak Viruses and Ugandan Cassava Brown Streak Viruses from East Africa:  
605 Diversity, Supercomputing and Evidence for Further Speciation. *PLoS One* **10**,  
606 e0139321, doi:10.1371/journal.pone.0139321 (2015).
- 607 20 Maruthi, M. N. *et al.* Transmission of Cassava brown streak virus by *Bemisia tabaci*  
608 (Gennadius). *J Phytopathol* **153**, 307-312 (2005).
- 609 21 Lister, R. M. Mechanical transmission of cassava brown streak virus. *Nature* **183**, 1588-  
610 1589 (1959).
- 611 22 Jennings, D. L. Observations on virus diseases of cassava in resistant and susceptible  
612 varieties. II. Brown streak disease. *Empire Journal of Experimental Agriculture* **28**, 261-  
613 269 (1960).
- 614 23 Nichols, R. F. W. The brown streak disease of cassava: Distribution, climatic effects and  
615 diagnostic symptoms. *East African Agricultural Journal* **15**, 154-160 (1950).
- 616 24 Ogwok, E., Ilyas, M., Alicai, T., Rey, M. E. & Taylor, N. J. Comparative analysis of virus-  
617 derived small RNAs within cassava (*Manihot esculenta* Crantz) infected with cassava  
618 brown streak viruses. *Virus Res* **215**, 1-11, doi:10.1016/j.virusres.2016.01.015 (2016).
- 619 25 Patil, B. L. *et al.* RNAi-mediated resistance to diverse isolates belonging to two virus  
620 species involved in Cassava brown streak disease. *Mol Plant Pathol* **12**, 31-41,  
621 doi:10.1111/j.1364-3703.2010.00650.x (2011).

- 622 26 Mohammed, I. U., Abarshi, M. M., Muli, B., Hillocks, R. J. & Maruthi, M. N. The  
623 symptom and genetic diversity of cassava brown streak viruses infecting cassava in  
624 East Africa. *Adv Virol* **2012**, 795697, doi:10.1155/2012/795697 (2012).
- 625 27 Mohammad, I. U., Ghosh, S. & Maruthi, M. N. Host and virus effects on reversion in  
626 cassava affected by cassava brown streak disease. *Plant Pathology* **65**, 593-600 (2016).
- 627 28 Jiang, J., Patarroyo, C., Garcia Cabanillas, D., Zheng, H. & Laliberte, J. F. The Vesicle-  
628 Forming 6K2 Protein of Turnip Mosaic Virus Interacts with the COPII Coatomer Sec24a  
629 for Viral Systemic Infection. *J Virol* **89**, 6695-6710, doi:10.1128/JVI.00503-15 (2015).
- 630 29 Dombrovsky, A., Reingold, V. & Antignus, Y. Ipomovirus--an atypical genus in the family  
631 Potyviridae transmitted by whiteflies. *Pest Manag Sci* **70**, 1553-1567,  
632 doi:10.1002/ps.3735 (2014).
- 633 30 Revers, F. & Garcia, J. A. Molecular biology of potyviruses. *Adv Virus Res* **92**, 101-199,  
634 doi:10.1016/bs.aivir.2014.11.006 (2015).
- 635 31 Sanjuan, R., Moya, A. & Elena, S. F. The distribution of fitness effects caused by single-  
636 nucleotide substitutions in an RNA virus. *Proc Natl Acad Sci U S A* **101**, 8396-8401,  
637 doi:10.1073/pnas.0400146101 (2004).
- 638 32 Luring, A. S., Frydman, J. & Andino, R. The role of mutational robustness in RNA virus  
639 evolution. *Nat Rev Microbiol* **11**, 327-336, doi:10.1038/nrmicro3003 (2013).
- 640 33 Acevedo, A., Brodsky, L. & Andino, R. Mutational and fitness landscapes of an RNA  
641 virus revealed through population sequencing. *Nature* **505**, 686-690,  
642 doi:10.1038/nature12861 (2014).
- 643 34 Wilke, C. O., Wang, J. L., Ofria, C., Lenski, R. E. & Adami, C. Evolution of digital  
644 organisms at high mutation rates leads to survival of the flattest. *Nature* **412**, 331-333,  
645 doi:10.1038/35085569 (2001).
- 646 35 Sanjuan, R., Cuevas, J. M., Furio, V., Holmes, E. C. & Moya, A. Selection for robustness  
647 in mutagenized RNA viruses. *PLoS Genet* **3**, e93, doi:10.1371/journal.pgen.0030093  
648 (2007).



- 649 36 Massingham, T. & Goldman, N. Detecting amino acid sites under positive selection and  
650 purifying selection. *Genetics* **169**, 1753-1762, doi:10.1534/genetics.104.032144 (2005).
- 651 37 Blevins, T. *et al.* Four plant Dicercs mediate viral small RNA biogenesis and DNA virus  
652 induced silencing. *Nucleic Acids Res* **34**, 6233-6246, doi:10.1093/nar/gkl886 (2006).
- 653 38 Kubatko, L. S. & Degnan, J. H. Inconsistency of phylogenetic estimates from  
654 concatenated data under coalescence. *Syst Biol* **56**, 17-24 (2007).
- 655 39 Degnan, J. H. & Salter, L. A. Gene tree distributions under the coalescent process.  
656 *Evolution* **59**, 24-37 (2005).
- 657 40 Monger, W. A. *et al.* The complete genome sequence of the Tanzanian strain of  
658 Cassava brown streak virus and comparison with the Ugandan strain sequence. *Arch*  
659 *Viro* **155**, 429-433 (2010).
- 660 41 Hahn, S. K., Isoba, J. C. G. & Ikotun, T. Resistance breeding in root and tuber crops at  
661 the International Institute of Tropical Agriculture (IITA), Ibadan, Nigeria. *Crop*  
662 *Protection* **8**, 147-168 (1989).
- 663 42 Hillocks, R. J., Raya, M. D. & Thresh, J. M. The association between root necrosis and  
664 above ground symptoms of brown streak virus infection of cassava in southern  
665 Tanzania. *International Journal of Pest Management* **42**, 285-289 (1996).
- 666 43 Mbanzibwa, D. R. *et al.* Simultaneous virus-specific detection of the two cassava brown  
667 streak-associated viruses by RT-PCR reveals wide distribution in East Africa, mixed  
668 infections, and infections in *Manihot glaziovii*. *J Virol Methods* **171**, 394-400,  
669 doi:10.1016/j.jviromet.2010.09.024 (2011).
- 670 44 Ndunguru, J., Legg, J. P., Aveling, T. A., Thompson, G. & Fauquet, C. M. Molecular  
671 biodiversity of cassava begomoviruses in Tanzania: evolution of cassava geminiviruses  
672 in Africa and evidence for East Africa being a center of diversity of cassava  
673 geminiviruses. *Virology* **2**, 21, doi:10.1186/1743-422X-2-21 (2005).
- 674 45 Altschul, S. F., Gish, W., Miller, W., Myers, E. W. & Lipman, D. J. Basic local alignment  
675 search tool. *J Mol Biol* **215**, 403-410, doi:10.1016/S0022-2836(05)80360-2 (1990).

- 676 46 Geneious v5.1. Available from <http://www.geneious.com/> (2010).
- 677 47 Katoh, K., Misawa, K., Kuma, K. & Miyata, T. MAFFT: a novel method for rapid multiple  
678 sequence alignment based on fast Fourier transform. *Nucleic Acids Res* **30**, 3059-3066  
679 (2002).
- 680 48 Kehoe, M. A., Coutts, B. A., Buirchell, B. J. & Jones, R. A. Split personality of a Potyvirus:  
681 to specialize or not to specialize? *PLoS One* **9**, e105770,  
682 doi:10.1371/journal.pone.0105770 (2014).
- 683 49 Kehoe, M. A., Coutts, B. A., Buirchell, B. J. & Jones, R. A. Plant virology and next  
684 generation sequencing: experiences with a Potyvirus. *PLoS One* **9**, e104580,  
685 doi:10.1371/journal.pone.0104580 (2014).
- 686 50 Korber, B. in *Computational Analysis of HIV Molecular Sequences* (eds A.G. Rodrigo &  
687 G. H. Learn) Ch. 4, 55-72 (Kluwer Academic Publishers, 2000).
- 688 51 Nei, M. & Gojobori, T. Simple methods for estimating the numbers of synonymous and  
689 nonsynonymous nucleotide substitutions. *Mol Biol Evol* **3**, 418-426 (1986).
- 690 52 Ota, T. & Nei, M. Variance and covariances of the numbers of synonymous and  
691 nonsynonymous substitutions per site. *Mol Biol Evol* **11**, 613-619 (1994).
- 692 53 Ganeshan, S., Dickover, R. E., Korber, B. T., Bryson, Y. J. & Wolinsky, S. M. Human  
693 immunodeficiency virus type 1 genetic evolution in children with different rates of  
694 development of disease. *J Virol* **71**, 663-677 (1997).
- 695 54 Yang, Z. PAML: a program package for phylogenetic analysis by maximum likelihood.  
696 *Comput Appl Biosci* **13**, 555-556 (1997).
- 697 55 Kosakovsky Pond, S. L. & Frost, S. D. Not so different after all: a comparison of  
698 methods for detecting amino acid sites under selection. *Mol Biol Evol* **22**, 1208-1222,  
699 doi:10.1093/molbev/msi105 (2005).

- 700 56 Delport, W., Poon, A. F., Frost, S. D. & Kosakovsky Pond, S. L. Datamonkey 2010: a suite  
701 of phylogenetic analysis tools for evolutionary biology. *Bioinformatics* **26**, 2455-2457,  
702 doi:10.1093/bioinformatics/btq429 (2010).
- 703 57 Ronquist, F. *et al.* MrBayes 3.2: Efficient Bayesian Phylogenetic Inference and Model  
704 Choice Across a Large Model Space. *Systematic Biology* **61**, 539-542,  
705 doi:10.1093/sysbio/sys029 (2012).
- 706 58 Ayres, D. L. *et al.* BEAGLE: an application programming interface and high-performance  
707 computing library for statistical phylogenetics. *Systematic Biology* **61**, 170-173,  
708 doi:10.1093/sysbio/syr100 (2012).
- 709 59 Chifman, J. & Kubatko, L. Quartet inference from SNP data under the coalescent  
710 model. *Bioinformatics* **30**, 3317-3324, doi:10.1093/bioinformatics/btu530 (2014).
- 711 60 Phylogenetic Analysis using Parsimony (\* and other methods) v. (open source version  
712 4.0a147 downloaded from [http://people.sc.fsu.edu/~dswofford/paup\\_test/](http://people.sc.fsu.edu/~dswofford/paup_test/) on March 25,  
713 2016). (Sinauer Associates, Sunderland, MA 2002).
- 714 61 Allman, E. S., Kubatko, L., Pearl, D. K. & Rhodes, J. A. Singular Value Decomposition of  
715 Site Pattern Frequency Matrices as a Tool to Quantify Phylogenetic Signal in Genome-  
716 Scale Data. **in press** (2016).
- 717  
718

719 Table 1: CBSD leaf symptom severities and types on plants infected by *Cassava brown streak*  
 720 *virus* and *Ugandan cassava brown streak virus*  
 721

| Virus species | Number of plants with CBSD foliar symptom severity score <sup>1</sup> |      |     |     | Number of plants with CBSD foliar symptom type <sup>2</sup> |      |     |
|---------------|-----------------------------------------------------------------------|------|-----|-----|-------------------------------------------------------------|------|-----|
|               | 2                                                                     | 3    | 4   | 5   | SW                                                          | LL   | SL  |
| CBSV          | 5                                                                     | 7    | 1   | 0   | 3                                                           | 8    | 2   |
| UCBSV         | 24                                                                    | 5    | 0   | 0   | 7                                                           | 21   | 1   |
| CBSV + UCBSV  | 9                                                                     | 6    | 0   | 0   | 5                                                           | 10   | 0   |
| Total         | 38                                                                    | 18   | 1   | 0   | 15                                                          | 39   | 3   |
| Percentage    | 66.7                                                                  | 31.6 | 1.7 | 0.0 | 26.3                                                        | 68.4 | 5.3 |

722

723

724 <sup>1</sup>Foliar CBSD symptom severity score based on 1-5 scale; 1 = no visible symptoms, 2 = mild vein  
 725 yellowing or chlorotic blotches on some leaves, 3 = pronounced/extensive vein yellowing  
 726 or chlorotic blotches on leaves, but no lesions or streaks on stems, 4 = pronounced/extensive  
 727 vein yellowing or chlorotic blotches on leaves and mild lesions or streaks on stems, 5 =  
 728 pronounced/extensive vein yellowing or chlorotic blotches on leaves and severe lesions or  
 729 streaks on stems, defoliation and dieback.

730 <sup>2</sup>Types of foliar CBSD symptoms based on distribution of leaf chlorosis and stem lesions on the  
 731 plant; systemic and on the whole plant (SW), systemic on leaf or stem parts but localized (SL),  
 732 only on lower leaves (LL).  
 733

4 Table 2. Next generation sequencing data for samples from cassava brown streak disease symptomatic plants collected in Uganda

5

| Sample ID | Accession number | Virus        | No. of reads obtained | No. of reads after trimming | Number of contigs produced (CLC) | Contig length (CLCGW, nt) | Average coverage (CLCGW) | Number of reads mapped to contig of interest | Ref seq. used for mapping | Length of consensus sequence from mapping (Geneious) | No. reads mapped to ref. sequence | Average coverage (Geneious) | Final sequence length (Coding region only) |
|-----------|------------------|--------------|-----------------------|-----------------------------|----------------------------------|---------------------------|--------------------------|----------------------------------------------|---------------------------|------------------------------------------------------|-----------------------------------|-----------------------------|--------------------------------------------|
| U1        |                  | <i>CBSV</i>  | 23,335,344            | 23,053,082                  | 726                              | 3919, 2214                | 31, 24                   | 1264, 549                                    | KR108828                  | 8,893                                                | 2,233                             | 25                          | 8,748                                      |
| U4        |                  | <i>CBSV</i>  | 21,844,716            | 21,582,374                  | 621                              | 8,949                     | 255                      | 23,658                                       | KR108828                  | 8,949                                                | 22,987                            | 256                         | 8,748                                      |
| U8        |                  | <i>UCBSV</i> | 23,648,990            | 23,373,606                  | 1,008                            | 8,954                     | 366                      | 33,778                                       | KR108836                  | 9,563                                                | 178,117                           | 393                         | 8,700                                      |

6

7

738 Table 3. *Cassava brown streak virus* (CBSV) amino acid (AA) sites under positive selection  
739 (analyses method: SLAC Hy-Phy). There were no sites under positive selection for  
740 *Ugandan cassava brown streak virus* (UCBSV).

741  
742

| Gene | CBSV AA site under positive selection                                                             |
|------|---------------------------------------------------------------------------------------------------|
| P1   | 44, 46, 50, 174, 224, 230, 250, 283, 288, 349, 358                                                |
| P3   | 415, 455, 467, 472, 499, 525, 618                                                                 |
| 6K1  | 658, 678                                                                                          |
| CI   | 735, 761, 820, 827, 848, 852, 894, 935, 1218                                                      |
| VPg  | 1465                                                                                              |
| NIa  | 1620, 1645, 1704, 1754, 1785                                                                      |
| Nib  | 1879, 1880, 1890, 1907, 1929, 2109, 2145, 2156, 2161, 2285                                        |
| HAM1 | 2320, 2345, 2404, 2432, 2453, 2475, 2519                                                          |
| CP   | 2550, 2555, 2588, 2611, 2631, 2635, 2640, 2659, 2728, 2745, 2783, 2818,<br>2843, 2860, 2877, 2884 |

743  
744  
745  
746  
747  
748  
749  
750  
751  
752  
753  
754  
755  
756  
757

758 Table 4. Rates of evolution tested using CODEML implemented in PAML.  $H_0$  was CBSV and  
 759 UCBSV have equal rates of evolution (one omega; model = 0), while  $H_1$  was that CBSV  
 760 and UCBSV have different rates of evolution (two omegas; model = 2).  
 761

| Gene | Assumptions                    | K (ts/tv rate ratio) | w (omega Dn/Ds) 0        | w (omega Dn/Ds)1        | Likelihood Ratio Test (if greater than 3.84 reject $H_0$ ) $H_0$ =equal rates |
|------|--------------------------------|----------------------|--------------------------|-------------------------|-------------------------------------------------------------------------------|
| WGS  | UCBSV and CBSV equal rates     | 5.90944              | 0.06358                  |                         |                                                                               |
|      | UCBSV and CBSV different rates | 5.9598               | 0.05518                  | <b>0.07622</b>          | 26.29*                                                                        |
| P1   | UCBSV and CBSV equal rates     | 5.07336              | 0.10394                  |                         |                                                                               |
|      | UCBSV and CBSV different rates | 5.05456              | 0.09047                  | <b>0.12203</b>          | 4.61*                                                                         |
| P3   | UCBSV and CBSV equal rates     | 5.17197              | 0.08635                  |                         |                                                                               |
|      | UCBSV and CBSV different rates | 5.20559              | 0.0764                   | <b>0.10198</b>          | 2.22                                                                          |
| 6K1  | UCBSV and CBSV equal rates     | 19.54143             | 0.00969                  |                         |                                                                               |
|      | UCBSV and CBSV different rates | 19.69676             | <b>0.01527</b>           | 0.00316                 | 3.01                                                                          |
| CI   | UCBSV and CBSV equal rates     | 9.9388               | 0.01722                  |                         |                                                                               |
|      | UCBSV and CBSV different rates | 8.06276              | 0.0155                   | <b>0.01977</b>          | 0.73                                                                          |
| 6K2  | UCBSV and CBSV equal rates     | 8.40649              | 0.04684                  |                         |                                                                               |
|      | UCBSV and CBSV different rates | 8.82738              | 0.02354                  | <b>0.11057</b>          | 6.74*                                                                         |
| VPg  | UCBSV and CBSV equal rates     | 5.852                | 0.05759                  |                         |                                                                               |
|      | UCBSV and CBSV different rates | 5.87009              | 0.054                    | <b>0.06323</b>          | 0.29                                                                          |
| N1a  | UCBSV and CBSV equal rates     | 8.01105              | 0.02932                  |                         |                                                                               |
|      | UCBSV and CBSV different rates | 8.68283              | 0.01408                  | <b>0.06719</b>          | 29.95*                                                                        |
| N1b  | UCBSV and CBSV equal rates     | 6.07872              | 0.05329                  |                         |                                                                               |
|      | UCBSV and CBSV different rates | 6.14047              | 0.0452                   | <b>0.06508</b>          | 5.18*                                                                         |
| HAM1 | UCBSV and CBSV equal rates     | 7.25177              | 0.16144                  |                         |                                                                               |
|      | UCBSV and CBSV different rates | 7.2343               | <b>0.17929</b>           | 0.14007                 | 2.23                                                                          |
| CP   | UCBSV and CBSV equal rates     | 13.09297             | 0.06075                  |                         |                                                                               |
|      | UCBSV and CBSV different rates | 13.26752             | 0.05606                  | <b>0.07155</b>          | 1.29                                                                          |
|      |                                |                      | <b>faster rate UCBSV</b> | <b>faster rate CBSV</b> | * Rates are different                                                         |

762  
763  
764  
765  
766  
767

Table 5. Support for Clades A – G (Figure 3) in individual gene trees and whole genome analyses. Table entries represent posterior probabilities from analysis with MrBayes, except values reported for SVDQ, which are bootstrap proportions. Support values below 95% are indicated in bold, and '--' indicates that the clade was not present.

| Genomic region | Clade A       | Clade B | Clade C       | Clade D       | Clade E       | Clade F     | Clade G       |
|----------------|---------------|---------|---------------|---------------|---------------|-------------|---------------|
| P1             | 0.9998        | 0.9998  | 0.9698        | 0.9972        | 0.9954        | --          | 0.9998        |
| P3             | 0.9998        | 0.9998  | 0.9857        | 0.9998        | 0.9998        | --          | 0.9998        |
| 6K1            | <b>0.9466</b> | 0.9985  | 0.9887        | 0.9995        | --            | --          | 0.9842        |
| CI             | 0.9998        | 0.9996  | 0.9976        | 0.9998        | 0.9998        | 0.9999      | 0.9999        |
| 6K2            | 0.9765        | 0.9998  | <b>0.7152</b> | <b>0.9170</b> | <b>0.6646</b> | --          | 0.9875        |
| Vpg            | 0.9998        | 0.9999  | --            | 0.9918        | <b>0.6455</b> | --          | 0.9999        |
| Nla            | 0.9996        | 0.9999  | 0.9998        | 0.9941        | <b>0.7631</b> | --          | <b>0.8934</b> |
| Nlb            | 0.9999        | 0.9998  | 0.9998        | 0.9999        | 0.9998        | --          | 0.9998        |
| HAM1-like      | --            | --      | --            | 0.9989        | 0.9983        | --          | 0.9855        |
| CP             | --            | --      | --            | 0.9959        | 0.9950        | --          | 0.9989        |
| Whole genome   | 1.00          | 1.00    | 1.00          | 1.00          | 1.00          | 1.00        | 1.00          |
| SVDQ           | 1.00          | 1.00    | 1.00          | 1.00          | <b>0.87</b>   | <b>0.44</b> | 1.00          |

768



769  
770  
771  
772  
773  
774  
775  
776  
777  
778  
779

Figure 1: Cassava brown streak disease symptoms on leaves and stems of sampled plants; **(a)** Chlorosis along secondary and tertiary leaf veins of CBSV-infected plant of cultivar TME 204 (severity score 3), **(b)** Cultivar TME 14 plant with dual CBSV+UCBSV infection showing chlorosis on secondary or tertiary veins, reverse chlorosis (general chlorosis and green area along veins) (severity score 3), **(c)** UCBSV-infected plant of cultivar TME 204 exhibiting chlorosis on secondary veins, reverse chlorosis, chlorotic spots and mild stem lesions (severity score 3), **(d)** Very severely diseased plant (severity score 5) of cultivar TME 14 infected with both CBSV and UCBSV, and having chlorosis on leaves, severe stem lesions/brown streaks, defoliation, stem dieback.

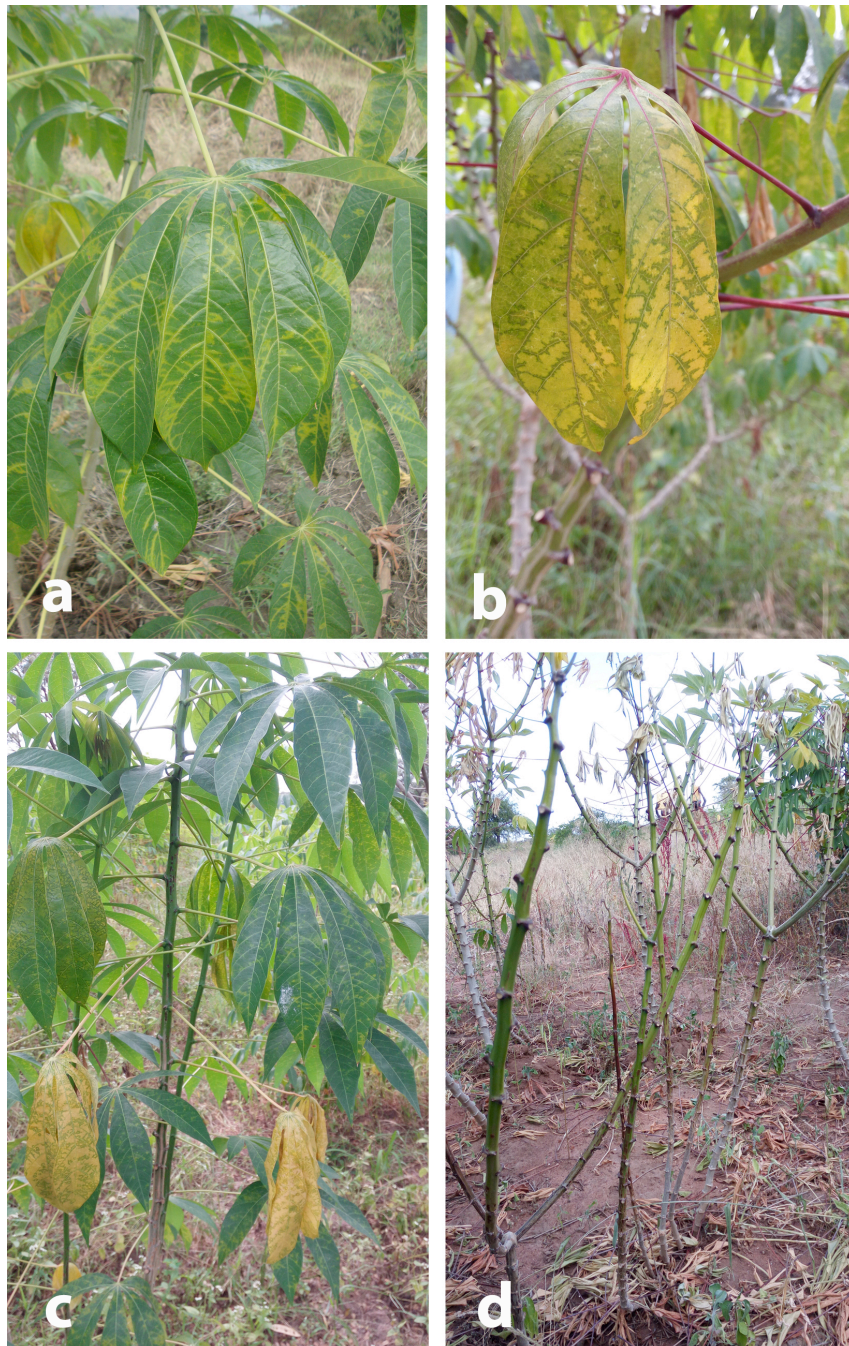

780

781 Figure 2. Genetic diversity of CBSV and UCBSV using the Synonymous Non-synonymous Analysis Program (SNAP v2.1.1) implemented in the  
782 Los Alamos National Laboratory HIV-sequence database (<http://www.hiv.lanl.gov>)<sup>50</sup>. UCBSV is on the top panel, CBSV at the  
783 bottom. The 10 gene segments are labeled from P1-CP.  
784

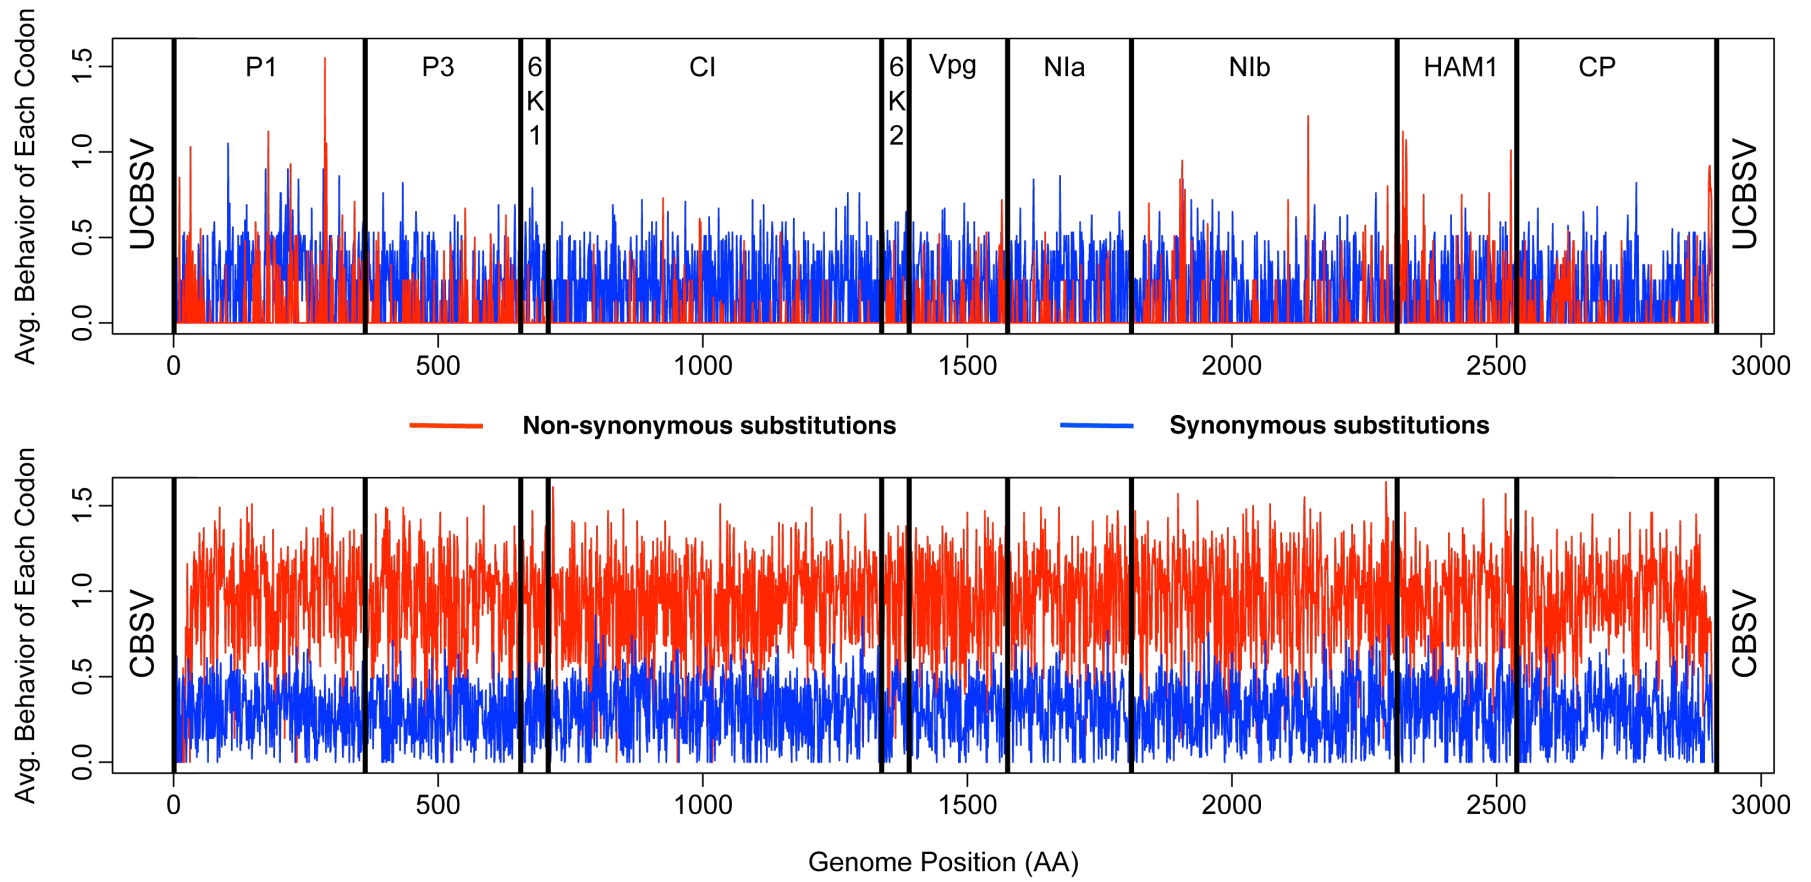

785

786 Figure 3. Species tree generated from SVD Quartets using the whole genome sequences. Colors  
 787 at the tips are based on country of origin. Branches with mixed colors indicate a clade  
 788 that contains samples with mixed country of origin. For example, the ancestral branch  
 789 of UCBSV TZ Tan 23 KR108839 and UCBSV UG MI B3 FJ039520 is colored red and  
 790 orange to indicate a clade with sampled with mixed country of origin.

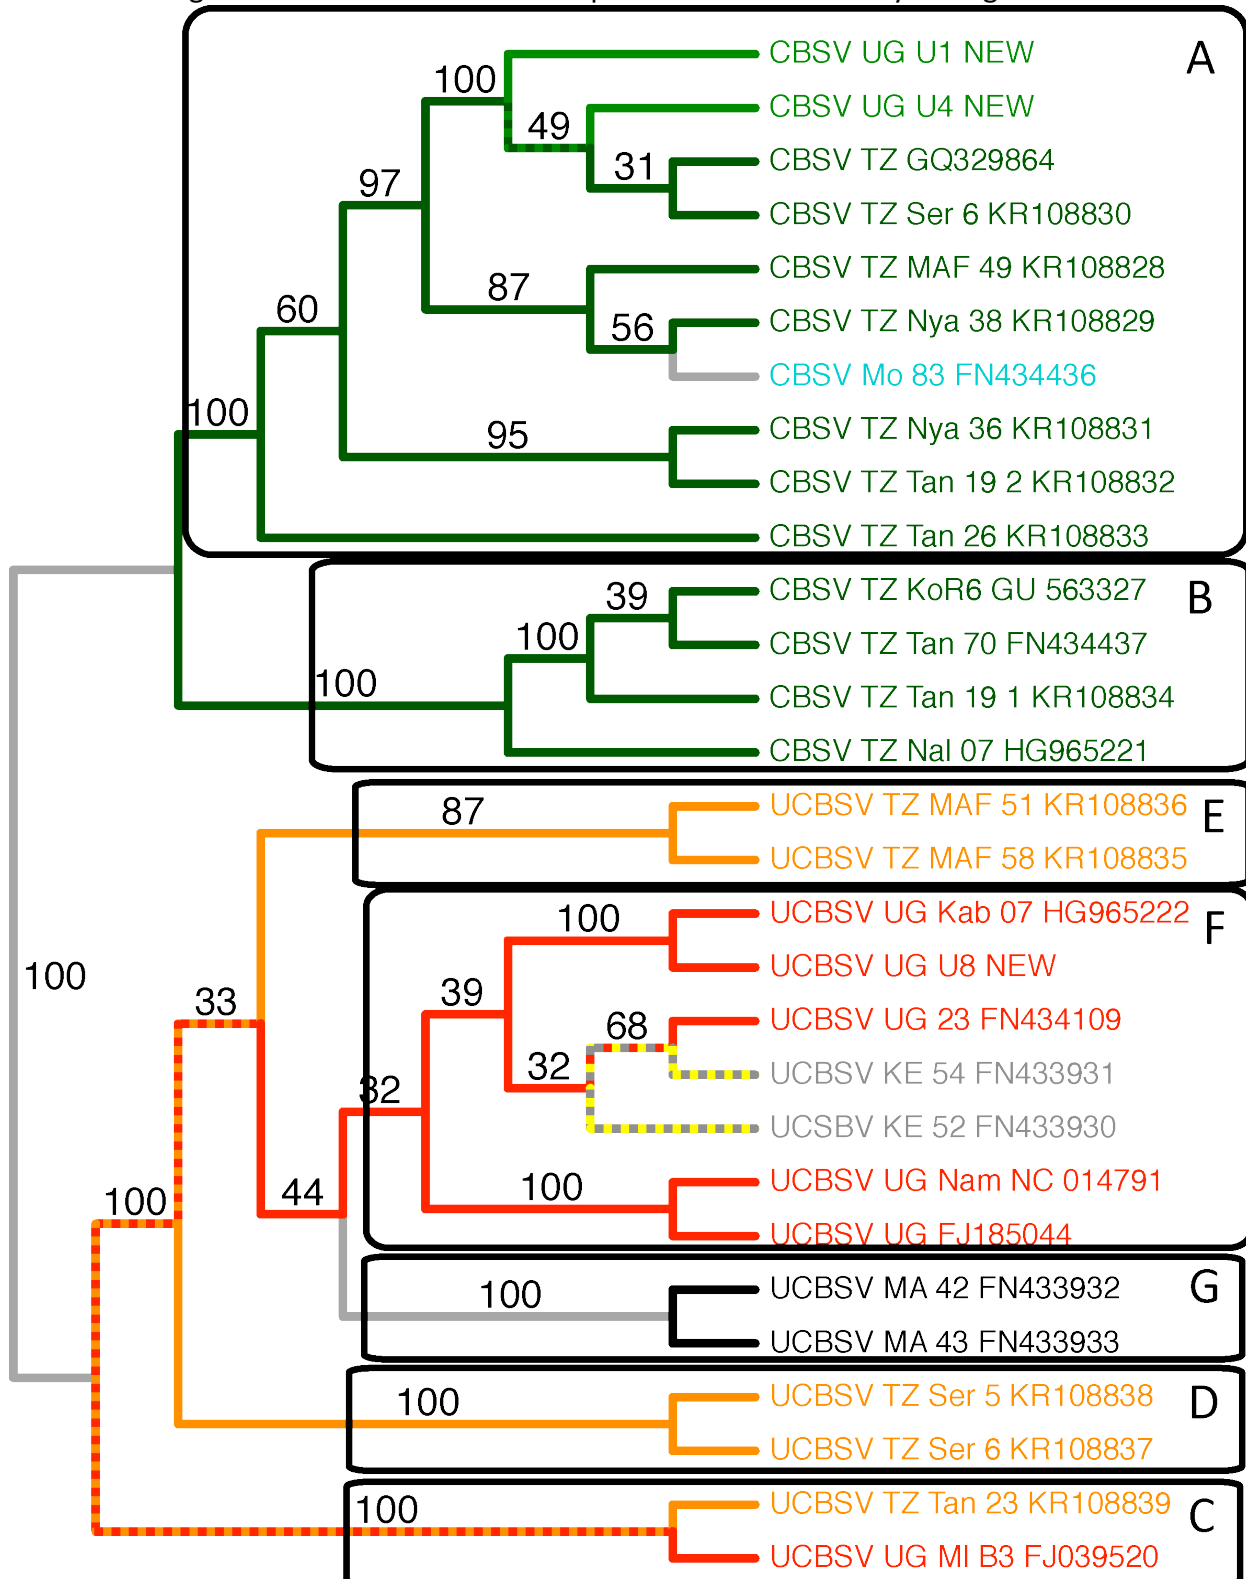

791

792 Figure 4. Computed SVD Score with the split defined by CBSV vs. UCBSV across the genome in windows of 500 bp, sliding in increments of  
 793 100 bp, and resulting SVD Scores plotted across the genome. Boundaries between genes are marked with vertical lines to further  
 794 characterize the CBSV and UCBSV genomes. Rates of molecular evolution were estimated using CODEML implemented in PAML  
 795 (Phylogenetic Analysis by Maximum Likelihood) <sup>54</sup>. The results are shown for each gene and D represents the difference in  
 796 likelihoods from the null hypothesis (CBSV and UCBSV have equal rates) and the alternative hypothesis (CBSV and UCBSV have  
 797 different rates).  
 798  
 799  
 800

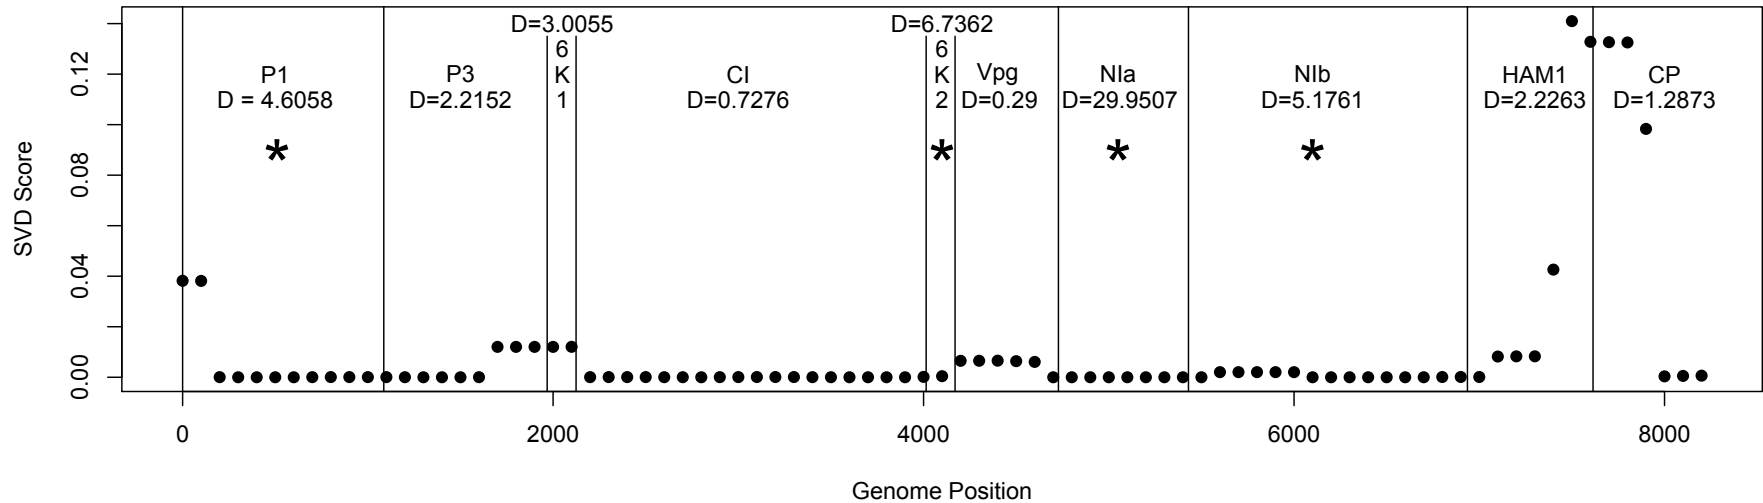

801  
 802

Supplemental Figure 1. CBSV Amino Acid variability obtained using datamonkey.org. Once files are uploaded to the site, the images below are obtained from the “Information from upload” tab and the pdf is downloaded.

| 5                                                                                                                                                                                                                                                                                                                                                                                                                                                                                                                                                                                                                                                                                                                                                                                                                                                                                                                                                                                                                                                                                                                                                                                                                                                                                                                                                                                                                                                                         | 10                                                                                                                                                                                                                                                                                                                                                                                                                                                                                                                                                                                                                                                                                                                                                                                                                                                                                                                                                                                                                                                                                                                                                                                                                                                                                                                                                                                                                                                                                                                                                                                                                                                                                                                                                                                                                                                                                                                                                                                                                                                                                                                                                           | 15                                                                                                                                                                                                                                                                                                                                                                                                                                                                                                                                                                                                                                                                                                                                                                                                                                                                                                                                                                                                                                                                                                                                                                                                                                                                                                                                                                                                                                                                                                                                                                                                                                                                                                                                                                                                                                                                                                     | 20                                                                                                                                                                                                                                                                                                                                                                                                                                                                                                                                                                                                                                                                                                                                                                                                                                                                                                                                                                                                                                                                                                                                                                                                                                                                                                                                                                                                                                                                                                                                                                                                                                                                                                                                                                                                                                                                                                                                  | 25                                                                                                                                                                                                                                                                                                                                                                                                                                                                                                                                                                                                                                                                                                                                                                                                                                                                                                                                                                                                                                                                                                                                                                                                                                                                                                                                                                                                                                                                                                                                                                                                                                                                                                                                                                                                                                                                                                                      | 30                                                                                                                                                                                                                                                                                                                                                                                                                                                                                                                                                                                                                                                                                                                                                                                                                                                                                                                                                                                                                                                                                                                                                                                                                                                                                                                                                                                                                                                                                                                                                                                                                                                                                                                                                                                                                                                                                                                                                                                                                                                                                                                                            | 35                                                                                                                                                                                                                                                                                                                                                                                                                                                                                                                                                                                                                                                                                                                                                                                                                                                                                                                                                                                                                                                                                                                                                                                                                                                                                                                                                                                                                                                                                                                                                                                                                                                                                                                                                                                                                                                    | 40                                                                                                                                                                                                                                                                                                                                                                                                                                                                                                                                                                                                                                                                                                                                                                                                                                                                                                                                                                                                                                                                                                                                                                                                                                                                                                                                                                                                                                                                                                                                                                                                                                                                                                                                                                                                                                                                                                                                                             |
|---------------------------------------------------------------------------------------------------------------------------------------------------------------------------------------------------------------------------------------------------------------------------------------------------------------------------------------------------------------------------------------------------------------------------------------------------------------------------------------------------------------------------------------------------------------------------------------------------------------------------------------------------------------------------------------------------------------------------------------------------------------------------------------------------------------------------------------------------------------------------------------------------------------------------------------------------------------------------------------------------------------------------------------------------------------------------------------------------------------------------------------------------------------------------------------------------------------------------------------------------------------------------------------------------------------------------------------------------------------------------------------------------------------------------------------------------------------------------|--------------------------------------------------------------------------------------------------------------------------------------------------------------------------------------------------------------------------------------------------------------------------------------------------------------------------------------------------------------------------------------------------------------------------------------------------------------------------------------------------------------------------------------------------------------------------------------------------------------------------------------------------------------------------------------------------------------------------------------------------------------------------------------------------------------------------------------------------------------------------------------------------------------------------------------------------------------------------------------------------------------------------------------------------------------------------------------------------------------------------------------------------------------------------------------------------------------------------------------------------------------------------------------------------------------------------------------------------------------------------------------------------------------------------------------------------------------------------------------------------------------------------------------------------------------------------------------------------------------------------------------------------------------------------------------------------------------------------------------------------------------------------------------------------------------------------------------------------------------------------------------------------------------------------------------------------------------------------------------------------------------------------------------------------------------------------------------------------------------------------------------------------------------|--------------------------------------------------------------------------------------------------------------------------------------------------------------------------------------------------------------------------------------------------------------------------------------------------------------------------------------------------------------------------------------------------------------------------------------------------------------------------------------------------------------------------------------------------------------------------------------------------------------------------------------------------------------------------------------------------------------------------------------------------------------------------------------------------------------------------------------------------------------------------------------------------------------------------------------------------------------------------------------------------------------------------------------------------------------------------------------------------------------------------------------------------------------------------------------------------------------------------------------------------------------------------------------------------------------------------------------------------------------------------------------------------------------------------------------------------------------------------------------------------------------------------------------------------------------------------------------------------------------------------------------------------------------------------------------------------------------------------------------------------------------------------------------------------------------------------------------------------------------------------------------------------------|-------------------------------------------------------------------------------------------------------------------------------------------------------------------------------------------------------------------------------------------------------------------------------------------------------------------------------------------------------------------------------------------------------------------------------------------------------------------------------------------------------------------------------------------------------------------------------------------------------------------------------------------------------------------------------------------------------------------------------------------------------------------------------------------------------------------------------------------------------------------------------------------------------------------------------------------------------------------------------------------------------------------------------------------------------------------------------------------------------------------------------------------------------------------------------------------------------------------------------------------------------------------------------------------------------------------------------------------------------------------------------------------------------------------------------------------------------------------------------------------------------------------------------------------------------------------------------------------------------------------------------------------------------------------------------------------------------------------------------------------------------------------------------------------------------------------------------------------------------------------------------------------------------------------------------------|-------------------------------------------------------------------------------------------------------------------------------------------------------------------------------------------------------------------------------------------------------------------------------------------------------------------------------------------------------------------------------------------------------------------------------------------------------------------------------------------------------------------------------------------------------------------------------------------------------------------------------------------------------------------------------------------------------------------------------------------------------------------------------------------------------------------------------------------------------------------------------------------------------------------------------------------------------------------------------------------------------------------------------------------------------------------------------------------------------------------------------------------------------------------------------------------------------------------------------------------------------------------------------------------------------------------------------------------------------------------------------------------------------------------------------------------------------------------------------------------------------------------------------------------------------------------------------------------------------------------------------------------------------------------------------------------------------------------------------------------------------------------------------------------------------------------------------------------------------------------------------------------------------------------------|-----------------------------------------------------------------------------------------------------------------------------------------------------------------------------------------------------------------------------------------------------------------------------------------------------------------------------------------------------------------------------------------------------------------------------------------------------------------------------------------------------------------------------------------------------------------------------------------------------------------------------------------------------------------------------------------------------------------------------------------------------------------------------------------------------------------------------------------------------------------------------------------------------------------------------------------------------------------------------------------------------------------------------------------------------------------------------------------------------------------------------------------------------------------------------------------------------------------------------------------------------------------------------------------------------------------------------------------------------------------------------------------------------------------------------------------------------------------------------------------------------------------------------------------------------------------------------------------------------------------------------------------------------------------------------------------------------------------------------------------------------------------------------------------------------------------------------------------------------------------------------------------------------------------------------------------------------------------------------------------------------------------------------------------------------------------------------------------------------------------------------------------------|-------------------------------------------------------------------------------------------------------------------------------------------------------------------------------------------------------------------------------------------------------------------------------------------------------------------------------------------------------------------------------------------------------------------------------------------------------------------------------------------------------------------------------------------------------------------------------------------------------------------------------------------------------------------------------------------------------------------------------------------------------------------------------------------------------------------------------------------------------------------------------------------------------------------------------------------------------------------------------------------------------------------------------------------------------------------------------------------------------------------------------------------------------------------------------------------------------------------------------------------------------------------------------------------------------------------------------------------------------------------------------------------------------------------------------------------------------------------------------------------------------------------------------------------------------------------------------------------------------------------------------------------------------------------------------------------------------------------------------------------------------------------------------------------------------------------------------------------------------|----------------------------------------------------------------------------------------------------------------------------------------------------------------------------------------------------------------------------------------------------------------------------------------------------------------------------------------------------------------------------------------------------------------------------------------------------------------------------------------------------------------------------------------------------------------------------------------------------------------------------------------------------------------------------------------------------------------------------------------------------------------------------------------------------------------------------------------------------------------------------------------------------------------------------------------------------------------------------------------------------------------------------------------------------------------------------------------------------------------------------------------------------------------------------------------------------------------------------------------------------------------------------------------------------------------------------------------------------------------------------------------------------------------------------------------------------------------------------------------------------------------------------------------------------------------------------------------------------------------------------------------------------------------------------------------------------------------------------------------------------------------------------------------------------------------------------------------------------------------------------------------------------------------------------------------------------------------|
| M <sub>14</sub> T <sub>9</sub> T <sub>13</sub> L <sub>1</sub> Q <sub>14</sub> L <sub>10</sub> F <sub>14</sub> K <sub>14</sub> T <sub>14</sub> V <sub>10</sub> Q <sub>14</sub> F <sub>14</sub> G <sub>14</sub> S <sub>14</sub> F <sub>14</sub> E <sub>14</sub> P <sub>13</sub> V <sub>9</sub> T <sub>14</sub> L <sub>1</sub> E <sub>9</sub> C <sub>13</sub> T <sub>9</sub> T <sub>10</sub> D <sub>8</sub> E <sub>9</sub> I <sub>9</sub> P <sub>10</sub> K <sub>11</sub> M <sub>10</sub> P <sub>14</sub> A <sub>9</sub> Y <sub>8</sub> I <sub>1</sub> A <sub>10</sub> N <sub>9</sub> A <sub>9</sub> E <sub>9</sub> G <sub>9</sub> S <sub>9</sub><br>A <sub>5</sub> S <sub>1</sub> V <sub>1</sub> V <sub>4</sub> I <sub>4</sub> L <sub>1</sub> I <sub>5</sub> K <sub>5</sub> F <sub>1</sub> D <sub>4</sub> S <sub>2</sub> E <sub>4</sub> P <sub>3</sub> V <sub>6</sub> L <sub>3</sub> Q <sub>1</sub> N <sub>2</sub> K <sub>3</sub> F <sub>2</sub> N <sub>2</sub> E <sub>3</sub> E <sub>4</sub> L <sub>2</sub> S <sub>2</sub> K <sub>2</sub> A <sub>1</sub><br>D <sub>1</sub> G <sub>2</sub> S <sub>1</sub> G <sub>1</sub> D <sub>1</sub> T <sub>1</sub> H <sub>1</sub> T <sub>1</sub> K <sub>1</sub> S <sub>1</sub> G <sub>1</sub> T <sub>2</sub> I <sub>1</sub> M <sub>1</sub><br>N <sub>1</sub> V <sub>1</sub> T <sub>1</sub> K <sub>1</sub> V <sub>1</sub> N <sub>1</sub><br>N <sub>1</sub> V <sub>1</sub> P <sub>1</sub> V <sub>1</sub><br>A <sub>1</sub> T <sub>1</sub> | S <sub>12</sub> N <sub>9</sub> A <sub>9</sub> L <sub>9</sub> E <sub>14</sub> N <sub>8</sub> A <sub>8</sub> P <sub>8</sub> E <sub>9</sub> L <sub>9</sub> V <sub>9</sub> S <sub>10</sub> G <sub>9</sub> N <sub>8</sub> D <sub>8</sub> N <sub>8</sub> Q <sub>9</sub> K <sub>12</sub> V <sub>9</sub> K <sub>10</sub> F <sub>9</sub> K <sub>9</sub> P <sub>9</sub> I <sub>9</sub> D <sub>9</sub> L <sub>9</sub> Y <sub>9</sub> S <sub>9</sub> I <sub>9</sub> I <sub>9</sub> G <sub>9</sub> N <sub>9</sub> S <sub>10</sub> I <sub>9</sub> Y <sub>13</sub> C <sub>9</sub> R <sub>9</sub> S <sub>9</sub> Y <sub>8</sub> V <sub>8</sub><br>G <sub>1</sub> E <sub>3</sub> V <sub>3</sub> E <sub>3</sub> K <sub>2</sub> K <sub>3</sub> E <sub>4</sub> V <sub>3</sub> C <sub>3</sub> E <sub>2</sub> K <sub>3</sub> K <sub>1</sub> Q <sub>4</sub> S <sub>5</sub> L <sub>2</sub> T <sub>2</sub> V <sub>3</sub> Q <sub>1</sub> P <sub>3</sub> I <sub>3</sub> D <sub>4</sub> L <sub>4</sub> F <sub>3</sub> S <sub>4</sub> I <sub>3</sub> I <sub>3</sub> G <sub>4</sub> N <sub>4</sub> S <sub>4</sub> V <sub>4</sub> Y <sub>4</sub> C <sub>4</sub> R <sub>3</sub> S <sub>4</sub> R <sub>1</sub> V <sub>4</sub> A <sub>4</sub> L <sub>4</sub> S <sub>4</sub> N <sub>4</sub><br>V <sub>1</sub> G <sub>1</sub> E <sub>2</sub> K <sub>1</sub> S <sub>1</sub> S <sub>2</sub> K <sub>1</sub> L <sub>2</sub> H <sub>1</sub> G <sub>1</sub> G <sub>1</sub> Q <sub>1</sub> D <sub>1</sub> G <sub>1</sub> N <sub>2</sub> K <sub>1</sub> T <sub>2</sub> E <sub>1</sub> F <sub>1</sub> V <sub>1</sub> P <sub>1</sub> I <sub>1</sub> D <sub>1</sub> L <sub>1</sub> Y <sub>1</sub> S <sub>1</sub> I <sub>1</sub> I <sub>1</sub> G <sub>1</sub> N <sub>1</sub> S <sub>1</sub> I <sub>1</sub> Y <sub>1</sub> C <sub>1</sub> S <sub>1</sub> Y <sub>1</sub> V <sub>1</sub> A <sub>1</sub> L <sub>2</sub><br>L <sub>1</sub> N <sub>1</sub> V <sub>1</sub> P <sub>1</sub> V <sub>1</sub> E <sub>1</sub> V <sub>1</sub> Q <sub>1</sub> T <sub>1</sub> E <sub>1</sub> S <sub>1</sub> S <sub>1</sub> Y <sub>1</sub> V <sub>1</sub> V <sub>1</sub><br>S <sub>1</sub> M <sub>1</sub><br>Q <sub>1</sub> | A <sub>9</sub> L <sub>13</sub> K <sub>9</sub> N <sub>9</sub> F <sub>9</sub> L <sub>9</sub> N <sub>9</sub> T <sub>9</sub> K <sub>9</sub> W <sub>9</sub> G <sub>9</sub> G <sub>9</sub> V <sub>9</sub> F <sub>9</sub> K <sub>10</sub> N <sub>8</sub> K <sub>9</sub> K <sub>9</sub> G <sub>9</sub> Q <sub>9</sub> E <sub>9</sub> T <sub>9</sub> S <sub>9</sub> A <sub>9</sub> A <sub>9</sub> G <sub>9</sub> R <sub>9</sub> L <sub>9</sub> S <sub>11</sub> R <sub>9</sub> A <sub>9</sub> T <sub>9</sub> S <sub>9</sub> Y <sub>11</sub> G <sub>9</sub> F <sub>9</sub> M <sub>9</sub> Y <sub>9</sub> D <sub>9</sub><br>F <sub>4</sub> N <sub>1</sub> N <sub>1</sub> D <sub>4</sub> T <sub>4</sub> K <sub>4</sub> W <sub>4</sub> G <sub>4</sub> G <sub>4</sub> V <sub>4</sub> F <sub>4</sub> K <sub>4</sub> N <sub>4</sub> K <sub>4</sub> K <sub>4</sub> G <sub>4</sub> Q <sub>3</sub> E <sub>4</sub> L <sub>4</sub> Q <sub>3</sub> A <sub>4</sub> A <sub>4</sub> K <sub>3</sub> R <sub>4</sub> L <sub>4</sub> S <sub>3</sub> S <sub>4</sub> A <sub>4</sub> T <sub>4</sub> A <sub>1</sub> Y <sub>4</sub> G <sub>4</sub> F <sub>4</sub> M <sub>4</sub> F <sub>1</sub> D <sub>4</sub> P <sub>4</sub> V <sub>4</sub> L <sub>4</sub> K <sub>4</sub><br>K <sub>1</sub> F <sub>1</sub> L <sub>1</sub> N <sub>1</sub> N <sub>1</sub> A <sub>1</sub> K <sub>1</sub> W <sub>1</sub> G <sub>1</sub> G <sub>1</sub> V <sub>1</sub> F <sub>1</sub> S <sub>1</sub> N <sub>1</sub> H <sub>1</sub> G <sub>1</sub> Q <sub>1</sub> E <sub>1</sub> T <sub>1</sub> S <sub>1</sub> Q <sub>1</sub> A <sub>1</sub> G <sub>1</sub> R <sub>2</sub> L <sub>1</sub> S <sub>1</sub> R <sub>1</sub> T <sub>1</sub> S <sub>1</sub> Y <sub>1</sub> G <sub>1</sub> M <sub>1</sub> Y <sub>1</sub> D <sub>1</sub> P <sub>1</sub> V <sub>1</sub><br>M <sub>1</sub> S <sub>1</sub> K <sub>1</sub> P <sub>1</sub> A <sub>1</sub><br>D <sub>1</sub> | P <sub>9</sub> V <sub>9</sub> A <sub>10</sub> R <sub>9</sub> A <sub>9</sub> F <sub>9</sub> E <sub>9</sub> C <sub>9</sub> P <sub>9</sub> V <sub>9</sub> C <sub>9</sub> S <sub>9</sub> V <sub>9</sub> K <sub>9</sub> A <sub>9</sub> T <sub>9</sub> E <sub>10</sub> L <sub>9</sub> E <sub>9</sub> A <sub>9</sub> F <sub>9</sub> S <sub>9</sub> S <sub>9</sub> D <sub>9</sub> C <sub>9</sub> S <sub>9</sub> H <sub>9</sub> C <sub>9</sub> F <sub>9</sub> E <sub>9</sub> I <sub>9</sub> K <sub>9</sub> H <sub>9</sub> V <sub>9</sub> G <sub>9</sub> D <sub>9</sub> P <sub>9</sub> R <sub>9</sub> I <sub>9</sub> T <sub>11</sub><br>A <sub>5</sub> F <sub>3</sub> E <sub>4</sub> C <sub>4</sub> P <sub>4</sub> K <sub>2</sub> C <sub>4</sub> S <sub>4</sub> T <sub>4</sub> K <sub>4</sub> A <sub>4</sub> T <sub>4</sub> E <sub>4</sub> L <sub>4</sub> E <sub>5</sub> A <sub>4</sub> F <sub>4</sub> C <sub>4</sub> S <sub>4</sub> D <sub>4</sub> C <sub>4</sub> D <sub>5</sub> H <sub>4</sub> C <sub>4</sub> F <sub>4</sub> E <sub>4</sub> I <sub>9</sub> K <sub>4</sub> H <sub>4</sub> I <sub>4</sub> G <sub>4</sub> D <sub>4</sub> G <sub>2</sub> R <sub>3</sub> D <sub>4</sub> T <sub>4</sub> K <sub>4</sub> L <sub>2</sub> D <sub>3</sub> V <sub>3</sub><br>Y <sub>1</sub> F <sub>1</sub> E <sub>1</sub> I <sub>1</sub> P <sub>1</sub> V <sub>1</sub> C <sub>1</sub> S <sub>1</sub> V <sub>1</sub> K <sub>1</sub> A <sub>1</sub> T <sub>1</sub> L <sub>1</sub> A <sub>1</sub> F <sub>1</sub> S <sub>1</sub> S <sub>1</sub> C <sub>1</sub> S <sub>1</sub> H <sub>1</sub> C <sub>1</sub> F <sub>1</sub> E <sub>1</sub> I <sub>1</sub> K <sub>1</sub> H <sub>1</sub> I <sub>1</sub> D <sub>2</sub> I <sub>1</sub> P <sub>1</sub> R <sub>1</sub> I <sub>1</sub> M <sub>2</sub> E <sub>1</sub><br>R <sub>1</sub> S <sub>1</sub> V <sub>1</sub> N <sub>1</sub> D <sub>1</sub> T <sub>1</sub> K <sub>1</sub><br>C <sub>1</sub> S <sub>1</sub> | K <sub>9</sub> T <sub>10</sub> E <sub>9</sub> T <sub>9</sub> Q <sub>9</sub> F <sub>9</sub> Y <sub>9</sub> P <sub>9</sub> L <sub>9</sub> N <sub>10</sub> P <sub>9</sub> N <sub>9</sub> E <sub>9</sub> L <sub>9</sub> D <sub>9</sub> V <sub>12</sub> T <sub>9</sub> E <sub>13</sub> E <sub>9</sub> L <sub>9</sub> D <sub>9</sub> V <sub>12</sub> S <sub>10</sub> S <sub>9</sub> S <sub>9</sub> V <sub>9</sub> W <sub>9</sub> L <sub>9</sub> D <sub>10</sub> E <sub>13</sub> D <sub>9</sub> V <sub>13</sub> E <sub>9</sub> E <sub>9</sub> A <sub>9</sub> V <sub>9</sub> V <sub>9</sub> D <sub>9</sub> S <sub>9</sub><br>Q <sub>4</sub> F <sub>4</sub> Y <sub>4</sub> P <sub>4</sub> V <sub>2</sub> N <sub>4</sub> P <sub>4</sub> I <sub>4</sub> E <sub>4</sub> L <sub>4</sub> D <sub>4</sub> T <sub>4</sub> T <sub>4</sub> D <sub>3</sub> E <sub>4</sub> I <sub>3</sub> L <sub>3</sub> L <sub>3</sub> V <sub>4</sub> A <sub>4</sub> T <sub>3</sub> S <sub>4</sub> T <sub>1</sub> W <sub>4</sub> F <sub>4</sub> E <sub>4</sub> E <sub>4</sub> D <sub>3</sub> V <sub>4</sub> K <sub>4</sub> V <sub>4</sub> V <sub>4</sub> E <sub>1</sub> V <sub>4</sub> D <sub>4</sub> K <sub>4</sub> L <sub>4</sub> I <sub>4</sub> T <sub>3</sub> T <sub>4</sub><br>E <sub>1</sub> Q <sub>1</sub> F <sub>1</sub> S <sub>1</sub> P <sub>1</sub> L <sub>1</sub> N <sub>1</sub> P <sub>1</sub> E <sub>1</sub> L <sub>1</sub> D <sub>1</sub> E <sub>1</sub> T <sub>1</sub> E <sub>1</sub> E <sub>1</sub> A <sub>1</sub> D <sub>1</sub> S <sub>1</sub> A <sub>1</sub> S <sub>1</sub> M <sub>1</sub> W <sub>1</sub> G <sub>1</sub> G <sub>1</sub> E <sub>1</sub> K <sub>1</sub> T <sub>1</sub> V <sub>1</sub> S <sub>1</sub> D <sub>1</sub> S <sub>1</sub> A <sub>1</sub> V <sub>1</sub><br>Y <sub>1</sub> S <sub>1</sub> V <sub>1</sub> V <sub>1</sub> L <sub>1</sub> V <sub>1</sub> L <sub>1</sub> T <sub>1</sub> M <sub>1</sub> L <sub>1</sub> | L <sub>9</sub> V <sub>9</sub> S <sub>9</sub> T <sub>9</sub> E <sub>8</sub> R <sub>9</sub> K <sub>12</sub> D <sub>9</sub> I <sub>9</sub> V <sub>13</sub> K <sub>9</sub> V <sub>9</sub> S <sub>9</sub> T <sub>8</sub> A <sub>9</sub> L <sub>9</sub> V <sub>9</sub> K <sub>11</sub> T <sub>9</sub> K <sub>10</sub> H <sub>9</sub> E <sub>9</sub> P <sub>9</sub> S <sub>6</sub> I <sub>9</sub> V <sub>9</sub> A <sub>9</sub> N <sub>8</sub> T <sub>8</sub> S <sub>10</sub> D <sub>9</sub> L <sub>13</sub> T <sub>14</sub> K <sub>9</sub> I <sub>1</sub> L <sub>9</sub> T <sub>9</sub> Q <sub>7</sub> I <sub>9</sub> C <sub>9</sub><br>D <sub>4</sub> E <sub>3</sub> K <sub>4</sub> N <sub>3</sub> M <sub>3</sub> V <sub>3</sub> I <sub>3</sub> T <sub>4</sub> S <sub>4</sub> I <sub>3</sub> A <sub>4</sub> L <sub>4</sub> V <sub>4</sub> K <sub>4</sub> N <sub>3</sub> K <sub>2</sub> Y <sub>3</sub> E <sub>3</sub> P <sub>4</sub> S <sub>2</sub> I <sub>3</sub> V <sub>3</sub> A <sub>3</sub> N <sub>4</sub> V <sub>4</sub> S <sub>4</sub> D <sub>3</sub> L <sub>4</sub> I <sub>3</sub> K <sub>3</sub> T <sub>5</sub> K <sub>1</sub> Q <sub>4</sub> T <sub>7</sub> C <sub>4</sub> C <sub>4</sub> E <sub>3</sub> T <sub>2</sub> G <sub>4</sub><br>S <sub>1</sub> K <sub>1</sub> E <sub>1</sub> C <sub>1</sub> I <sub>1</sub> D <sub>1</sub> S <sub>1</sub> V <sub>1</sub> V <sub>1</sub> S <sub>1</sub> T <sub>1</sub> A <sub>1</sub> I <sub>1</sub> K <sub>1</sub> S <sub>2</sub> E <sub>1</sub> H <sub>1</sub> E <sub>1</sub> M <sub>1</sub> I <sub>1</sub> I <sub>1</sub> K <sub>3</sub> T <sub>1</sub> N <sub>1</sub> V <sub>1</sub> S <sub>1</sub> V <sub>2</sub> L <sub>1</sub> L <sub>1</sub> Q <sub>1</sub> I <sub>1</sub> K <sub>1</sub> C <sub>1</sub> E <sub>1</sub><br>T <sub>1</sub> D <sub>1</sub> K <sub>1</sub> M <sub>1</sub> K <sub>1</sub> L <sub>1</sub> V <sub>1</sub> E <sub>1</sub> T <sub>1</sub> I <sub>1</sub> Y <sub>1</sub> P <sub>1</sub> S <sub>1</sub> T <sub>1</sub> V <sub>1</sub> E <sub>1</sub> D <sub>1</sub> R <sub>1</sub> S <sub>1</sub><br>D <sub>1</sub> C <sub>1</sub> A <sub>1</sub><br>D <sub>1</sub> | C <sub>9</sub> E <sub>9</sub> S <sub>9</sub> G <sub>9</sub> M <sub>10</sub> P <sub>9</sub> M <sub>9</sub> I <sub>9</sub> D <sub>10</sub> L <sub>9</sub> D <sub>9</sub> H <sub>9</sub> R <sub>9</sub> K <sub>9</sub> S <sub>9</sub> S <sub>9</sub> A <sub>9</sub> I <sub>9</sub> P <sub>9</sub> M <sub>9</sub> V <sub>9</sub> H <sub>9</sub> L <sub>9</sub> K <sub>9</sub> H <sub>9</sub> V <sub>9</sub> Y <sub>9</sub> G <sub>9</sub> I <sub>9</sub> I <sub>9</sub> E <sub>9</sub> E <sub>9</sub> D <sub>9</sub> D <sub>9</sub> L <sub>9</sub> S <sub>11</sub> E <sub>9</sub> E <sub>9</sub> D <sub>9</sub> S <sub>9</sub><br>M <sub>4</sub> P <sub>4</sub> I <sub>4</sub> I <sub>4</sub> D <sub>4</sub> L <sub>4</sub> D <sub>5</sub> H <sub>2</sub> K <sub>4</sub> K <sub>4</sub> S <sub>4</sub> K <sub>5</sub> A <sub>4</sub> I <sub>4</sub> P <sub>4</sub> M <sub>4</sub> V <sub>4</sub> R <sub>4</sub> L <sub>3</sub> K <sub>4</sub> H <sub>4</sub> V <sub>4</sub> F <sub>4</sub> G <sub>4</sub> V <sub>4</sub> L <sub>3</sub> E <sub>4</sub> S <sub>4</sub> D <sub>4</sub> D <sub>4</sub> L <sub>4</sub> F <sub>4</sub> E <sub>4</sub> E <sub>4</sub> D <sub>4</sub> E <sub>1</sub> V <sub>4</sub> F <sub>4</sub> L <sub>4</sub> E <sub>4</sub><br>S <sub>1</sub> G <sub>1</sub> M <sub>1</sub> P <sub>1</sub> I <sub>1</sub> Y <sub>2</sub> H <sub>1</sub> R <sub>1</sub> S <sub>1</sub> S <sub>1</sub> A <sub>1</sub> I <sub>1</sub> P <sub>1</sub> M <sub>1</sub> V <sub>2</sub> H <sub>1</sub> L <sub>1</sub> K <sub>1</sub> H <sub>1</sub> V <sub>1</sub> Y <sub>1</sub> G <sub>1</sub> I <sub>1</sub> I <sub>1</sub> E <sub>1</sub> E <sub>1</sub> D <sub>1</sub> D <sub>1</sub> L <sub>1</sub> S <sub>1</sub> E <sub>1</sub> D <sub>1</sub> S <sub>1</sub> G <sub>1</sub> F <sub>1</sub><br>L <sub>1</sub> R <sub>1</sub> V <sub>1</sub> | G <sub>8</sub> F <sub>9</sub> L <sub>9</sub> E <sub>9</sub> H <sub>9</sub> V <sub>9</sub> N <sub>9</sub> A <sub>8</sub> S <sub>8</sub> K <sub>9</sub> V <sub>9</sub> F <sub>9</sub> W <sub>9</sub> S <sub>9</sub> C <sub>9</sub> E <sub>9</sub> K <sub>9</sub> I <sub>9</sub> C <sub>9</sub> Y <sub>9</sub> N <sub>8</sub> M <sub>9</sub> V <sub>9</sub> S <sub>12</sub> P <sub>9</sub> G <sub>9</sub> W <sub>9</sub> S <sub>9</sub> G <sub>9</sub> A <sub>9</sub> V <sub>9</sub> M <sub>9</sub> M <sub>9</sub> S <sub>10</sub> S <sub>9</sub> S <sub>9</sub> V <sub>8</sub> Q <sub>9</sub> E <sub>12</sub> N <sub>9</sub><br>H <sub>4</sub> S <sub>3</sub> N <sub>4</sub> A <sub>4</sub> S <sub>4</sub> K <sub>4</sub> V <sub>4</sub> F <sub>4</sub> R <sub>5</sub> S <sub>4</sub> C <sub>4</sub> E <sub>4</sub> K <sub>4</sub> V <sub>4</sub> S <sub>4</sub> Y <sub>4</sub> S <sub>4</sub> M <sub>4</sub> V <sub>4</sub> S <sub>4</sub> P <sub>4</sub> G <sub>4</sub> W <sub>4</sub> G <sub>4</sub> G <sub>4</sub> A <sub>4</sub> V <sub>3</sub> M <sub>4</sub> M <sub>4</sub> E <sub>4</sub> D <sub>4</sub> S <sub>4</sub> V <sub>4</sub> Q <sub>3</sub> G <sub>4</sub> I <sub>3</sub> D <sub>4</sub> R <sub>4</sub> G <sub>2</sub> K <sub>4</sub><br>L <sub>1</sub> G <sub>1</sub> H <sub>1</sub> V <sub>1</sub> N <sub>1</sub> A <sub>1</sub> R <sub>1</sub> K <sub>1</sub> V <sub>1</sub> F <sub>1</sub> W <sub>1</sub> S <sub>1</sub> C <sub>1</sub> E <sub>1</sub> K <sub>1</sub> I <sub>1</sub> G <sub>1</sub> Y <sub>1</sub> S <sub>1</sub> M <sub>1</sub> D <sub>1</sub> S <sub>1</sub> P <sub>1</sub> K <sub>1</sub> W <sub>1</sub> S <sub>1</sub> G <sub>1</sub> A <sub>1</sub> I <sub>1</sub> M <sub>1</sub> M <sub>1</sub> I <sub>1</sub> D <sub>1</sub> L <sub>1</sub> P <sub>1</sub> T <sub>1</sub> I <sub>1</sub> S <sub>1</sub> H <sub>1</sub><br>S <sub>1</sub> E <sub>1</sub> T <sub>1</sub> V <sub>1</sub> Q <sub>1</sub> E <sub>1</sub> |



|                                                                                                                                                                                                                                                                                                                                                                                                                                                                                                                                                                                                                                                                                                                                                                                                                                                                                                                                                                                                                                                                                                                                                                                                                                                                                                                                                                                                                                                                                                                                                                                                                                                                                                                                                                                                                                                                                                                                   |     |     |     |     |     |     |     |
|-----------------------------------------------------------------------------------------------------------------------------------------------------------------------------------------------------------------------------------------------------------------------------------------------------------------------------------------------------------------------------------------------------------------------------------------------------------------------------------------------------------------------------------------------------------------------------------------------------------------------------------------------------------------------------------------------------------------------------------------------------------------------------------------------------------------------------------------------------------------------------------------------------------------------------------------------------------------------------------------------------------------------------------------------------------------------------------------------------------------------------------------------------------------------------------------------------------------------------------------------------------------------------------------------------------------------------------------------------------------------------------------------------------------------------------------------------------------------------------------------------------------------------------------------------------------------------------------------------------------------------------------------------------------------------------------------------------------------------------------------------------------------------------------------------------------------------------------------------------------------------------------------------------------------------------|-----|-----|-----|-----|-----|-----|-----|
| 325                                                                                                                                                                                                                                                                                                                                                                                                                                                                                                                                                                                                                                                                                                                                                                                                                                                                                                                                                                                                                                                                                                                                                                                                                                                                                                                                                                                                                                                                                                                                                                                                                                                                                                                                                                                                                                                                                                                               | 330 | 335 | 340 | 345 | 350 | 355 | 360 |
| E <sub>9</sub> H <sub>13</sub> D <sub>9</sub> M <sub>9</sub> F <sub>10</sub> D <sub>9</sub> F <sub>9</sub> V <sub>9</sub> D <sub>9</sub> M <sub>9</sub> C <sub>9</sub> V <sub>9</sub> V <sub>9</sub> Q <sub>9</sub> G <sub>9</sub> K <sub>10</sub> N <sub>9</sub> K <sub>9</sub> I <sub>13</sub> S <sub>9</sub> G <sub>9</sub> K <sub>9</sub> I <sub>9</sub> E <sub>9</sub> N <sub>9</sub> A <sub>9</sub> L <sub>9</sub> V <sub>9</sub> S <sub>10</sub> K <sub>9</sub> S <sub>9</sub> W <sub>9</sub> D <sub>9</sub> E <sub>9</sub> L <sub>9</sub> Q <sub>9</sub> Q <sub>9</sub> I <sub>9</sub> E <sub>9</sub><br>F <sub>4</sub> M <sub>1</sub> F <sub>5</sub> I <sub>1</sub> D <sub>4</sub> G <sub>4</sub> M <sub>4</sub> C <sub>4</sub> V <sub>4</sub> V <sub>4</sub> Q <sub>4</sub> G <sub>4</sub> K <sub>4</sub> N <sub>4</sub> K <sub>4</sub> S <sub>4</sub> S <sub>4</sub> G <sub>4</sub> R <sub>4</sub> G <sub>4</sub> E <sub>4</sub> N <sub>4</sub> A <sub>4</sub> L <sub>4</sub> V <sub>4</sub> L <sub>4</sub> K <sub>4</sub> S <sub>4</sub> S <sub>4</sub> E <sub>3</sub> D <sub>3</sub> L <sub>4</sub> S <sub>4</sub> E <sub>4</sub> I <sub>4</sub> E <sub>4</sub> L <sub>4</sub> Y <sub>4</sub> S <sub>4</sub> F <sub>4</sub><br>D <sub>1</sub> V <sub>2</sub> V <sub>1</sub> N <sub>1</sub> D <sub>1</sub> M <sub>1</sub> C <sub>1</sub> V <sub>1</sub> V <sub>1</sub> Q <sub>1</sub> G <sub>1</sub> E <sub>1</sub> E <sub>1</sub> N <sub>1</sub> I <sub>1</sub> S <sub>1</sub> V <sub>1</sub> K <sub>1</sub> I <sub>1</sub> E <sub>1</sub> N <sub>1</sub> A <sub>1</sub> P <sub>2</sub> V <sub>1</sub> K <sub>1</sub> D <sub>1</sub> W <sub>1</sub> D <sub>1</sub> G <sub>1</sub> L <sub>1</sub> Q <sub>1</sub> Q <sub>1</sub> I <sub>1</sub> H <sub>1</sub> M <sub>1</sub> Y <sub>1</sub><br>N <sub>1</sub> N <sub>1</sub> N <sub>1</sub> E <sub>1</sub> E <sub>1</sub> E <sub>1</sub> E <sub>1</sub>               |     |     |     |     |     |     |     |
| 365                                                                                                                                                                                                                                                                                                                                                                                                                                                                                                                                                                                                                                                                                                                                                                                                                                                                                                                                                                                                                                                                                                                                                                                                                                                                                                                                                                                                                                                                                                                                                                                                                                                                                                                                                                                                                                                                                                                               | 370 | 375 | 380 | 385 | 390 | 395 | 400 |
| M <sub>9</sub> Y <sub>9</sub> S <sub>11</sub> F <sub>9</sub> D <sub>9</sub> L <sub>9</sub> S <sub>9</sub> W <sub>9</sub> A <sub>9</sub> R <sub>10</sub> S <sub>9</sub> R <sub>9</sub> D <sub>9</sub> D <sub>9</sub> F <sub>11</sub> F <sub>9</sub> K <sub>9</sub> Y <sub>9</sub> F <sub>9</sub> D <sub>9</sub> E <sub>9</sub> D <sub>9</sub> V <sub>9</sub> G <sub>9</sub> S <sub>9</sub> L <sub>9</sub> I <sub>9</sub> S <sub>9</sub> T <sub>9</sub> C <sub>9</sub> C <sub>9</sub> T <sub>9</sub> P <sub>9</sub> S <sub>9</sub> T <sub>9</sub> L <sub>10</sub> W <sub>9</sub> L <sub>9</sub> Y <sub>9</sub> A <sub>9</sub><br>D <sub>4</sub> L <sub>4</sub> D <sub>1</sub> W <sub>4</sub> A <sub>4</sub> R <sub>4</sub> T <sub>4</sub> R <sub>5</sub> D <sub>4</sub> N <sub>4</sub> F <sub>4</sub> F <sub>3</sub> R <sub>4</sub> H <sub>4</sub> K <sub>4</sub> D <sub>4</sub> D <sub>5</sub> V <sub>4</sub> G <sub>4</sub> K <sub>4</sub> L <sub>4</sub> I <sub>4</sub> S <sub>4</sub> T <sub>4</sub> C <sub>4</sub> C <sub>4</sub> T <sub>4</sub> P <sub>4</sub> S <sub>4</sub> T <sub>4</sub> L <sub>4</sub> W <sub>4</sub> L <sub>5</sub> Y <sub>4</sub> A <sub>4</sub> K <sub>4</sub> K <sub>4</sub> A <sub>4</sub> S <sub>4</sub><br>S <sub>1</sub> F <sub>1</sub> L <sub>1</sub> S <sub>1</sub> W <sub>1</sub> A <sub>1</sub> S <sub>1</sub> D <sub>1</sub> D <sub>1</sub> F <sub>1</sub> F <sub>1</sub> Y <sub>1</sub> F <sub>1</sub> E <sub>1</sub> N <sub>1</sub> V <sub>1</sub> S <sub>1</sub> S <sub>1</sub> L <sub>1</sub> I <sub>1</sub> S <sub>1</sub> T <sub>1</sub> C <sub>1</sub> C <sub>1</sub> T <sub>1</sub> P <sub>1</sub> S <sub>1</sub> T <sub>1</sub> T <sub>1</sub> W <sub>1</sub> Y <sub>1</sub> A <sub>1</sub> K <sub>1</sub> K <sub>1</sub><br>Y <sub>1</sub> N <sub>1</sub>                                                                                                                         |     |     |     |     |     |     |     |
| 405                                                                                                                                                                                                                                                                                                                                                                                                                                                                                                                                                                                                                                                                                                                                                                                                                                                                                                                                                                                                                                                                                                                                                                                                                                                                                                                                                                                                                                                                                                                                                                                                                                                                                                                                                                                                                                                                                                                               | 410 | 415 | 420 | 425 | 430 | 435 | 440 |
| K <sub>9</sub> K <sub>9</sub> A <sub>9</sub> S <sub>9</sub> F <sub>9</sub> Y <sub>10</sub> K <sub>9</sub> Y <sub>9</sub> V <sub>9</sub> D <sub>9</sub> H <sub>9</sub> M <sub>9</sub> I <sub>9</sub> L <sub>9</sub> K <sub>9</sub> G <sub>9</sub> S <sub>9</sub> P <sub>9</sub> L <sub>11</sub> V <sub>13</sub> D <sub>9</sub> I <sub>9</sub> L <sub>9</sub> V <sub>9</sub> K <sub>9</sub> M <sub>9</sub> E <sub>9</sub> Y <sub>9</sub> V <sub>9</sub> G <sub>9</sub> K <sub>9</sub> H <sub>9</sub> L <sub>9</sub> E <sub>9</sub> M <sub>9</sub> F <sub>9</sub> N <sub>9</sub> S <sub>9</sub> V <sub>9</sub> E <sub>9</sub><br>F <sub>4</sub> Y <sub>4</sub> K <sub>4</sub> Y <sub>4</sub> V <sub>4</sub> D <sub>4</sub> H <sub>4</sub> M <sub>4</sub> M <sub>4</sub> L <sub>4</sub> K <sub>4</sub> G <sub>4</sub> S <sub>4</sub> P <sub>4</sub> L <sub>4</sub> V <sub>4</sub> D <sub>4</sub> M <sub>4</sub> D <sub>1</sub> I <sub>1</sub> K <sub>4</sub> M <sub>4</sub> E <sub>4</sub> Y <sub>4</sub> V <sub>4</sub> G <sub>4</sub> K <sub>4</sub> H <sub>4</sub> L <sub>4</sub> E <sub>4</sub> M <sub>4</sub> F <sub>4</sub> N <sub>4</sub> S <sub>4</sub> V <sub>4</sub> E <sub>4</sub> D <sub>4</sub> V <sub>4</sub> C <sub>4</sub> L <sub>4</sub><br>A <sub>1</sub> S <sub>1</sub> F <sub>1</sub> K <sub>1</sub> V <sub>1</sub> D <sub>1</sub> H <sub>1</sub> M <sub>1</sub> I <sub>1</sub> L <sub>1</sub> K <sub>1</sub> G <sub>1</sub> S <sub>1</sub> P <sub>1</sub> L <sub>1</sub> V <sub>1</sub> L <sub>1</sub> V <sub>1</sub> K <sub>1</sub> M <sub>1</sub> E <sub>1</sub> Y <sub>1</sub> V <sub>1</sub> G <sub>1</sub> K <sub>1</sub> H <sub>1</sub> L <sub>2</sub> E <sub>1</sub> M <sub>1</sub> F <sub>1</sub> N <sub>1</sub> S <sub>1</sub> V <sub>1</sub> E <sub>1</sub> D <sub>1</sub> V <sub>1</sub>                                                                                                              |     |     |     |     |     |     |     |
| 445                                                                                                                                                                                                                                                                                                                                                                                                                                                                                                                                                                                                                                                                                                                                                                                                                                                                                                                                                                                                                                                                                                                                                                                                                                                                                                                                                                                                                                                                                                                                                                                                                                                                                                                                                                                                                                                                                                                               | 450 | 455 | 460 | 465 | 470 | 475 | 480 |
| D <sub>9</sub> V <sub>9</sub> C <sub>9</sub> L <sub>9</sub> E <sub>9</sub> Y <sub>9</sub> A <sub>9</sub> H <sub>9</sub> F <sub>9</sub> M <sub>9</sub> Q <sub>13</sub> D <sub>9</sub> L <sub>9</sub> M <sub>9</sub> Q <sub>9</sub> D <sub>13</sub> H <sub>9</sub> V <sub>9</sub> T <sub>8</sub> D <sub>9</sub> Q <sub>9</sub> S <sub>9</sub> N <sub>9</sub> E <sub>9</sub> D <sub>9</sub> I <sub>9</sub> L <sub>9</sub> R <sub>9</sub> V <sub>9</sub> K <sub>9</sub> N <sub>9</sub> L <sub>9</sub> I <sub>9</sub> R <sub>9</sub> S <sub>13</sub> Y <sub>9</sub> F <sub>9</sub> D <sub>9</sub> S <sub>13</sub> V <sub>9</sub><br>E <sub>4</sub> Y <sub>4</sub> A <sub>4</sub> H <sub>4</sub> F <sub>4</sub> M <sub>4</sub> Q <sub>4</sub> D <sub>4</sub> M <sub>4</sub> I <sub>4</sub> L <sub>4</sub> E <sub>4</sub> Q <sub>5</sub> V <sub>4</sub> N <sub>4</sub> V <sub>4</sub> Q <sub>5</sub> S <sub>4</sub> D <sub>4</sub> E <sub>4</sub> N <sub>4</sub> M <sub>4</sub> M <sub>4</sub> R <sub>4</sub> V <sub>4</sub> K <sub>4</sub> N <sub>4</sub> L <sub>4</sub> I <sub>4</sub> R <sub>4</sub> S <sub>4</sub> Y <sub>4</sub> F <sub>4</sub> D <sub>4</sub> F <sub>1</sub> V <sub>4</sub> I <sub>4</sub> E <sub>4</sub> I <sub>4</sub> N <sub>4</sub><br>C <sub>1</sub> L <sub>1</sub> E <sub>1</sub> Y <sub>1</sub> A <sub>1</sub> H <sub>1</sub> F <sub>1</sub> M <sub>1</sub> V <sub>2</sub> D <sub>1</sub> M <sub>1</sub> I <sub>1</sub> C <sub>1</sub> T <sub>1</sub> D <sub>1</sub> Q <sub>1</sub> S <sub>1</sub> H <sub>1</sub> E <sub>1</sub> D <sub>1</sub> I <sub>1</sub> L <sub>1</sub> R <sub>1</sub> V <sub>1</sub> K <sub>1</sub> N <sub>1</sub> L <sub>1</sub> I <sub>1</sub> R <sub>1</sub> S <sub>1</sub> Y <sub>1</sub> D <sub>1</sub> S <sub>1</sub> V <sub>1</sub> E <sub>1</sub><br>Q <sub>1</sub> D <sub>1</sub> N <sub>1</sub> S <sub>1</sub> T <sub>1</sub> N <sub>1</sub> M <sub>1</sub>                |     |     |     |     |     |     |     |
| 485                                                                                                                                                                                                                                                                                                                                                                                                                                                                                                                                                                                                                                                                                                                                                                                                                                                                                                                                                                                                                                                                                                                                                                                                                                                                                                                                                                                                                                                                                                                                                                                                                                                                                                                                                                                                                                                                                                                               | 490 | 495 | 500 | 505 | 510 | 515 | 520 |
| I <sub>9</sub> E <sub>9</sub> A <sub>9</sub> N <sub>9</sub> K <sub>9</sub> Y <sub>9</sub> E <sub>9</sub> L <sub>9</sub> I <sub>13</sub> D <sub>12</sub> R <sub>9</sub> I <sub>9</sub> I <sub>9</sub> D <sub>9</sub> K <sub>9</sub> K <sub>9</sub> T <sub>8</sub> Q <sub>13</sub> L <sub>9</sub> E <sub>9</sub> A <sub>9</sub> Q <sub>9</sub> E <sub>9</sub> I <sub>9</sub> I <sub>9</sub> S <sub>9</sub> R <sub>9</sub> E <sub>9</sub> L <sub>9</sub> I <sub>9</sub> K <sub>9</sub> H <sub>9</sub> Q <sub>9</sub> Y <sub>9</sub> G <sub>9</sub> A <sub>9</sub> L <sub>9</sub> F <sub>9</sub> S <sub>9</sub> L <sub>13</sub><br>K <sub>4</sub> Y <sub>4</sub> E <sub>4</sub> L <sub>4</sub> I <sub>4</sub> D <sub>4</sub> S <sub>4</sub> I <sub>4</sub> R <sub>4</sub> I <sub>4</sub> K <sub>4</sub> K <sub>4</sub> S <sub>4</sub> E <sub>4</sub> L <sub>4</sub> E <sub>4</sub> A <sub>4</sub> E <sub>1</sub> E <sub>4</sub> V <sub>4</sub> I <sub>4</sub> S <sub>4</sub> R <sub>4</sub> E <sub>4</sub> L <sub>4</sub> I <sub>4</sub> K <sub>4</sub> H <sub>4</sub> Q <sub>4</sub> Y <sub>4</sub> G <sub>4</sub> D <sub>4</sub> L <sub>4</sub> F <sub>4</sub> S <sub>4</sub> L <sub>4</sub> R <sub>4</sub> E <sub>4</sub> R <sub>4</sub> E <sub>1</sub><br>A <sub>1</sub> N <sub>1</sub> K <sub>1</sub> S <sub>1</sub> E <sub>1</sub> L <sub>1</sub> I <sub>1</sub> D <sub>1</sub> E <sub>1</sub> I <sub>1</sub> E <sub>1</sub> K <sub>1</sub> K <sub>1</sub> T <sub>1</sub> Q <sub>1</sub> L <sub>1</sub> A <sub>1</sub> Q <sub>1</sub> E <sub>1</sub> I <sub>1</sub> I <sub>1</sub> S <sub>1</sub> R <sub>1</sub> E <sub>1</sub> L <sub>1</sub> I <sub>1</sub> K <sub>1</sub> H <sub>1</sub> Q <sub>1</sub> Y <sub>1</sub> G <sub>1</sub> A <sub>1</sub> L <sub>1</sub> F <sub>1</sub> S <sub>1</sub> L <sub>1</sub><br>Y <sub>1</sub> S <sub>1</sub> S <sub>1</sub>                                                             |     |     |     |     |     |     |     |
| 525                                                                                                                                                                                                                                                                                                                                                                                                                                                                                                                                                                                                                                                                                                                                                                                                                                                                                                                                                                                                                                                                                                                                                                                                                                                                                                                                                                                                                                                                                                                                                                                                                                                                                                                                                                                                                                                                                                                               | 530 | 535 | 540 | 545 | 550 | 555 | 560 |
| R <sub>10</sub> E <sub>9</sub> R <sub>9</sub> I <sub>1</sub> S <sub>1</sub> T <sub>1</sub> N <sub>1</sub> I <sub>9</sub> G <sub>9</sub> F <sub>9</sub> D <sub>9</sub> S <sub>14</sub> A <sub>9</sub> S <sub>10</sub> L <sub>9</sub> S <sub>11</sub> S <sub>9</sub> L <sub>9</sub> W <sub>9</sub> K <sub>9</sub> E <sub>10</sub> S <sub>9</sub> E <sub>9</sub> S <sub>9</sub> L <sub>9</sub> S <sub>13</sub> R <sub>9</sub> S <sub>11</sub> D <sub>9</sub> S <sub>11</sub> S <sub>9</sub> F <sub>9</sub> F <sub>9</sub> S <sub>13</sub> C <sub>9</sub> L <sub>9</sub> M <sub>9</sub> S <sub>9</sub> S <sub>9</sub> P <sub>9</sub><br>L <sub>4</sub> I <sub>4</sub> N <sub>4</sub> G <sub>4</sub> F <sub>4</sub> D <sub>4</sub> S <sub>4</sub> A <sub>4</sub> K <sub>4</sub> L <sub>4</sub> S <sub>4</sub> L <sub>4</sub> W <sub>4</sub> E <sub>4</sub> E <sub>4</sub> S <sub>4</sub> E <sub>5</sub> S <sub>5</sub> V <sub>4</sub> K <sub>4</sub> Q <sub>4</sub> K <sub>6</sub> S <sub>3</sub> K <sub>1</sub> S <sub>4</sub> I <sub>4</sub> L <sub>4</sub> I <sub>4</sub> C <sub>4</sub> L <sub>4</sub> I <sub>4</sub> L <sub>4</sub> K <sub>4</sub> P <sub>4</sub> G <sub>4</sub> M <sub>4</sub> E <sub>4</sub> M <sub>5</sub><br>M <sub>1</sub> S <sub>1</sub> N <sub>1</sub> V <sub>1</sub> G <sub>1</sub> F <sub>1</sub> D <sub>1</sub> S <sub>1</sub> A <sub>1</sub> L <sub>1</sub> S <sub>1</sub> L <sub>1</sub> W <sub>1</sub> K <sub>1</sub> M <sub>1</sub> L <sub>1</sub> G <sub>1</sub> D <sub>1</sub> V <sub>2</sub> S <sub>1</sub> F <sub>1</sub> S <sub>1</sub> C <sub>1</sub> M <sub>1</sub> S <sub>1</sub> S <sub>1</sub> P <sub>1</sub> G <sub>1</sub><br>Q <sub>1</sub> R <sub>1</sub>                                                                                                                                                                                                                             |     |     |     |     |     |     |     |
| 565                                                                                                                                                                                                                                                                                                                                                                                                                                                                                                                                                                                                                                                                                                                                                                                                                                                                                                                                                                                                                                                                                                                                                                                                                                                                                                                                                                                                                                                                                                                                                                                                                                                                                                                                                                                                                                                                                                                               | 570 | 575 | 580 | 585 | 590 | 595 | 600 |
| G <sub>9</sub> M <sub>10</sub> E <sub>9</sub> M <sub>9</sub> C <sub>9</sub> A <sub>9</sub> N <sub>9</sub> W <sub>9</sub> I <sub>9</sub> L <sub>9</sub> S <sub>9</sub> V <sub>9</sub> C <sub>9</sub> S <sub>14</sub> S <sub>9</sub> S <sub>10</sub> Y <sub>9</sub> S <sub>9</sub> N <sub>9</sub> T <sub>9</sub> L <sub>9</sub> Y <sub>9</sub> L <sub>9</sub> V <sub>9</sub> D <sub>9</sub> K <sub>9</sub> G <sub>9</sub> V <sub>9</sub> V <sub>9</sub> F <sub>9</sub> F <sub>9</sub> W <sub>9</sub> S <sub>13</sub> S <sub>9</sub> M <sub>9</sub> V <sub>9</sub> H <sub>9</sub> I <sub>9</sub> F <sub>9</sub> Q <sub>9</sub><br>L <sub>3</sub> A <sub>4</sub> N <sub>4</sub> W <sub>4</sub> I <sub>4</sub> S <sub>4</sub> E <sub>4</sub> V <sub>4</sub> F <sub>4</sub> K <sub>4</sub> N <sub>4</sub> C <sub>4</sub> Y <sub>4</sub> N <sub>4</sub> T <sub>4</sub> M <sub>4</sub> Y <sub>4</sub> L <sub>5</sub> V <sub>4</sub> D <sub>4</sub> R <sub>4</sub> S <sub>4</sub> M <sub>4</sub> M <sub>4</sub> F <sub>4</sub> I <sub>4</sub> W <sub>4</sub> N <sub>4</sub> R <sub>4</sub> M <sub>4</sub> V <sub>4</sub> V <sub>1</sub> I <sub>4</sub> F <sub>4</sub> N <sub>4</sub> S <sub>4</sub> C <sub>4</sub> V <sub>4</sub> Y <sub>4</sub><br>F <sub>1</sub> C <sub>1</sub> A <sub>1</sub> N <sub>1</sub> W <sub>1</sub> T <sub>1</sub> A <sub>1</sub> T <sub>1</sub> S <sub>1</sub> K <sub>1</sub> S <sub>1</sub> S <sub>1</sub> Y <sub>1</sub> N <sub>1</sub> I <sub>1</sub> Y <sub>1</sub> M <sub>1</sub> V <sub>1</sub> D <sub>1</sub> K <sub>1</sub> G <sub>1</sub> V <sub>1</sub> V <sub>1</sub> F <sub>1</sub> F <sub>1</sub> W <sub>1</sub> S <sub>1</sub> S <sub>1</sub> V <sub>1</sub> V <sub>4</sub> I <sub>1</sub> F <sub>1</sub> Q <sub>1</sub> T <sub>1</sub> C <sub>1</sub><br>E <sub>1</sub> S <sub>1</sub> L <sub>1</sub> S <sub>1</sub> V <sub>1</sub> C <sub>1</sub> S <sub>1</sub> I <sub>1</sub> H <sub>1</sub> |     |     |     |     |     |     |     |
| 605                                                                                                                                                                                                                                                                                                                                                                                                                                                                                                                                                                                                                                                                                                                                                                                                                                                                                                                                                                                                                                                                                                                                                                                                                                                                                                                                                                                                                                                                                                                                                                                                                                                                                                                                                                                                                                                                                                                               | 610 | 615 | 620 | 625 | 630 | 635 | 640 |
| T <sub>9</sub> C <sub>9</sub> V <sub>9</sub> Y <sub>10</sub> G <sub>9</sub> Y <sub>9</sub> W <sub>9</sub> N <sub>9</sub> L <sub>9</sub> W <sub>9</sub> F <sub>9</sub> S <sub>9</sub> K <sub>9</sub> A <sub>9</sub> V <sub>10</sub> C <sub>9</sub> V <sub>9</sub> L <sub>9</sub> M <sub>9</sub> A <sub>9</sub> F <sub>9</sub> V <sub>9</sub> I <sub>9</sub> M <sub>9</sub> G <sub>9</sub> F <sub>9</sub> S <sub>9</sub> G <sub>9</sub> K <sub>9</sub> A <sub>9</sub> M <sub>9</sub> D <sub>9</sub> Y <sub>9</sub> L <sub>9</sub> K <sub>13</sub> K <sub>9</sub> L <sub>9</sub> I <sub>9</sub> K <sub>13</sub> N <sub>9</sub><br>G <sub>4</sub> Y <sub>5</sub> W <sub>4</sub> N <sub>4</sub> L <sub>4</sub> W <sub>4</sub> F <sub>4</sub> R <sub>4</sub> K <sub>4</sub> A <sub>4</sub> V <sub>3</sub> C <sub>4</sub> V <sub>5</sub> L <sub>4</sub> M <sub>4</sub> V <sub>4</sub> F <sub>4</sub> V <sub>3</sub> V <sub>4</sub> T <sub>4</sub> G <sub>4</sub> F <sub>4</sub> S <sub>4</sub> S <sub>4</sub> K <sub>3</sub> I <sub>4</sub> I <sub>4</sub> E <sub>3</sub> F <sub>4</sub> L <sub>4</sub> K <sub>3</sub> K <sub>4</sub> L <sub>4</sub> I <sub>4</sub> L <sub>4</sub> N <sub>4</sub> E <sub>4</sub> S <sub>4</sub> E <sub>1</sub> Q <sub>4</sub><br>V <sub>1</sub> G <sub>1</sub> W <sub>1</sub> N <sub>1</sub> L <sub>1</sub> W <sub>1</sub> F <sub>1</sub> S <sub>1</sub> M <sub>1</sub> A <sub>1</sub> C <sub>1</sub> L <sub>1</sub> M <sub>1</sub> A <sub>1</sub> F <sub>1</sub> V <sub>1</sub> I <sub>1</sub> M <sub>1</sub> G <sub>1</sub> F <sub>1</sub> S <sub>2</sub> G <sub>1</sub> K <sub>1</sub> V <sub>1</sub> M <sub>1</sub> V <sub>4</sub> Y <sub>1</sub> L <sub>1</sub> K <sub>1</sub> M <sub>1</sub> I <sub>1</sub> K <sub>1</sub> N <sub>1</sub> S <sub>1</sub><br>K <sub>1</sub> M <sub>1</sub> D <sub>1</sub> S <sub>1</sub> K <sub>1</sub> M <sub>1</sub>                                              |     |     |     |     |     |     |     |
| 645                                                                                                                                                                                                                                                                                                                                                                                                                                                                                                                                                                                                                                                                                                                                                                                                                                                                                                                                                                                                                                                                                                                                                                                                                                                                                                                                                                                                                                                                                                                                                                                                                                                                                                                                                                                                                                                                                                                               | 650 | 655 | 660 | 665 | 670 | 675 | 680 |
| E <sub>9</sub> S <sub>9</sub> K <sub>10</sub> Q <sub>9</sub> A <sub>9</sub> I <sub>9</sub> Q <sub>9</sub> Y <sub>9</sub> E <sub>9</sub> E <sub>13</sub> G <sub>9</sub> L <sub>9</sub> V <sub>10</sub> E <sub>9</sub> V <sub>9</sub> Q <sub>9</sub> G <sub>9</sub> S <sub>13</sub> S <sub>9</sub> E <sub>9</sub> E <sub>9</sub> S <sub>9</sub> F <sub>9</sub> V <sub>9</sub> L <sub>9</sub> R <sub>9</sub> W <sub>9</sub> C <sub>9</sub> A <sub>10</sub> F <sub>11</sub> A <sub>9</sub> T <sub>9</sub> L <sub>10</sub> F <sub>9</sub> L <sub>9</sub> S <sub>9</sub> F <sub>9</sub> I <sub>9</sub> N <sub>9</sub> Y <sub>9</sub><br>A <sub>4</sub> M <sub>4</sub> Q <sub>4</sub> F <sub>4</sub> E <sub>4</sub> E <sub>4</sub> G <sub>4</sub> L <sub>4</sub> V <sub>3</sub> L <sub>1</sub> V <sub>5</sub> Q <sub>4</sub> G <sub>4</sub> S <sub>4</sub> K <sub>4</sub> E <sub>4</sub> E <sub>4</sub> E <sub>1</sub> F <sub>4</sub> V <sub>4</sub> L <sub>4</sub> R <sub>4</sub> W <sub>4</sub> C <sub>4</sub> A <sub>4</sub> F <sub>4</sub> A <sub>5</sub> T <sub>4</sub> L <sub>4</sub> T <sub>1</sub> L <sub>5</sub> S <sub>4</sub> F <sub>4</sub> M <sub>3</sub> N <sub>4</sub> Y <sub>4</sub> D <sub>4</sub> W <sub>4</sub> A <sub>4</sub> V <sub>4</sub><br>S <sub>1</sub> Q <sub>1</sub> A <sub>1</sub> I <sub>1</sub> Q <sub>1</sub> Y <sub>1</sub> E <sub>1</sub> E <sub>1</sub> G <sub>1</sub> E <sub>1</sub> Q <sub>1</sub> G <sub>1</sub> S <sub>1</sub> K <sub>1</sub> K <sub>1</sub> S <sub>1</sub> F <sub>1</sub> V <sub>1</sub> L <sub>1</sub> R <sub>1</sub> W <sub>1</sub> C <sub>1</sub> F <sub>1</sub> F <sub>1</sub> I <sub>1</sub> F <sub>1</sub> I <sub>1</sub> N <sub>1</sub> Y <sub>1</sub> D <sub>1</sub> W <sub>1</sub><br>I <sub>1</sub> E <sub>1</sub> S <sub>1</sub>                                                                                                                                     |     |     |     |     |     |     |     |
| 685                                                                                                                                                                                                                                                                                                                                                                                                                                                                                                                                                                                                                                                                                                                                                                                                                                                                                                                                                                                                                                                                                                                                                                                                                                                                                                                                                                                                                                                                                                                                                                                                                                                                                                                                                                                                                                                                                                                               | 690 | 695 | 700 | 705 | 710 | 715 | 720 |
| D <sub>9</sub> W <sub>9</sub> A <sub>9</sub> V <sub>9</sub> G <sub>9</sub> S <sub>10</sub> V <sub>9</sub> S <sub>9</sub> A <sub>9</sub> I <sub>9</sub> G <sub>9</sub> K <sub>10</sub> M <sub>9</sub> K <sub>9</sub> T <sub>9</sub> V <sub>6</sub> F <sub>9</sub> G <sub>9</sub> A <sub>9</sub> L <sub>9</sub> G <sub>9</sub> P <sub>9</sub> D <sub>9</sub> F <sub>9</sub> I <sub>9</sub> E <sub>9</sub> S <sub>10</sub> Q <sub>9</sub> S <sub>12</sub> G <sub>9</sub> D <sub>13</sub> D <sub>10</sub> N <sub>9</sub> D <sub>9</sub> E <sub>9</sub> L <sub>9</sub> S <sub>6</sub> F <sub>9</sub> T <sub>9</sub> T <sub>9</sub><br>G <sub>4</sub> S <sub>4</sub> V <sub>4</sub> S <sub>4</sub> A <sub>4</sub> I <sub>4</sub> G <sub>4</sub> K <sub>4</sub> M <sub>4</sub> K <sub>5</sub> T <sub>4</sub> M <sub>4</sub> F <sub>4</sub> G <sub>4</sub> A <sub>4</sub> L <sub>4</sub> G <sub>4</sub> P <sub>4</sub> D <sub>4</sub> F <sub>4</sub> I <sub>4</sub> E <sub>4</sub> S <sub>4</sub> Q <sub>4</sub> S <sub>3</sub> G <sub>4</sub> D <sub>4</sub> E <sub>2</sub> D <sub>1</sub> D <sub>5</sub> N <sub>1</sub> L <sub>4</sub> K <sub>4</sub> F <sub>4</sub> T <sub>4</sub> T <sub>4</sub> F <sub>4</sub> E <sub>4</sub> V <sub>4</sub> E <sub>5</sub><br>A <sub>1</sub> V <sub>1</sub> G <sub>1</sub> V <sub>1</sub> A <sub>1</sub> I <sub>1</sub> G <sub>1</sub> M <sub>1</sub> T <sub>1</sub> I <sub>1</sub> F <sub>1</sub> I <sub>2</sub> A <sub>1</sub> L <sub>1</sub> G <sub>1</sub> P <sub>1</sub> D <sub>1</sub> F <sub>1</sub> I <sub>1</sub> E <sub>1</sub> N <sub>2</sub> Q <sub>1</sub> D <sub>2</sub> N <sub>1</sub> E <sub>1</sub> L <sub>1</sub> S <sub>1</sub> F <sub>1</sub> K <sub>1</sub> T <sub>1</sub> F <sub>1</sub><br>G <sub>1</sub> T <sub>1</sub>                                                                                                                                                     |     |     |     |     |     |     |     |



|                                                                                                                                                                                                                                                                                                                                                                                                                                                                                                                                                                                                                                                                                                                                                                                                                                                                                                                                                                                                                                                                                                                                                                                                                                                                                                                                                                                                                                                                                                                                                                                                                                                                                                                                                                                                                                                                                                                                |      |      |      |      |      |      |      |
|--------------------------------------------------------------------------------------------------------------------------------------------------------------------------------------------------------------------------------------------------------------------------------------------------------------------------------------------------------------------------------------------------------------------------------------------------------------------------------------------------------------------------------------------------------------------------------------------------------------------------------------------------------------------------------------------------------------------------------------------------------------------------------------------------------------------------------------------------------------------------------------------------------------------------------------------------------------------------------------------------------------------------------------------------------------------------------------------------------------------------------------------------------------------------------------------------------------------------------------------------------------------------------------------------------------------------------------------------------------------------------------------------------------------------------------------------------------------------------------------------------------------------------------------------------------------------------------------------------------------------------------------------------------------------------------------------------------------------------------------------------------------------------------------------------------------------------------------------------------------------------------------------------------------------------|------|------|------|------|------|------|------|
| 1165                                                                                                                                                                                                                                                                                                                                                                                                                                                                                                                                                                                                                                                                                                                                                                                                                                                                                                                                                                                                                                                                                                                                                                                                                                                                                                                                                                                                                                                                                                                                                                                                                                                                                                                                                                                                                                                                                                                           | 1170 | 1175 | 1180 | 1185 | 1190 | 1195 | 1200 |
| S <sub>2</sub> S <sub>3</sub> Y <sub>2</sub> L <sub>2</sub> A <sub>2</sub> T <sub>2</sub> N <sub>2</sub> M <sub>2</sub> S <sub>2</sub> E <sub>2</sub> W <sub>2</sub> S <sub>2</sub> R <sub>2</sub> V <sub>2</sub> C <sub>2</sub> E <sub>2</sub> Y <sub>2</sub> I <sub>2</sub> K <sub>2</sub> I <sub>2</sub> D <sub>2</sub> E <sub>2</sub> S <sub>2</sub> S <sub>2</sub> R <sub>2</sub> H <sub>2</sub> V <sub>2</sub> Q <sub>2</sub> E <sub>2</sub> V <sub>2</sub> K <sub>2</sub> I <sub>2</sub> P <sub>2</sub> W <sub>2</sub> Y <sub>2</sub> C <sub>2</sub> S <sub>2</sub> D <sub>13</sub> M <sub>2</sub> S <sub>2</sub><br>A <sub>4</sub> T <sub>4</sub> N <sub>4</sub> M <sub>4</sub> S <sub>4</sub> E <sub>4</sub> W <sub>4</sub> S <sub>4</sub> R <sub>4</sub> V <sub>4</sub> C <sub>4</sub> E <sub>4</sub> Y <sub>4</sub> I <sub>4</sub> K <sub>4</sub> I <sub>4</sub> D <sub>4</sub> M <sub>4</sub> S <sub>4</sub> S <sub>4</sub> H <sub>4</sub> V <sub>4</sub> Q <sub>4</sub> E <sub>4</sub> V <sub>4</sub> K <sub>4</sub> M <sub>4</sub> P <sub>4</sub> W <sub>4</sub> Y <sub>4</sub> C <sub>4</sub> S <sub>4</sub> D <sub>4</sub> M <sub>4</sub> S <sub>4</sub> D <sub>4</sub> S <sub>4</sub> F <sub>4</sub> I <sub>4</sub><br>Y <sub>1</sub> L <sub>1</sub> A <sub>1</sub> T <sub>1</sub> N <sub>1</sub> M <sub>1</sub> S <sub>1</sub> E <sub>1</sub> W <sub>1</sub> S <sub>1</sub> R <sub>1</sub> V <sub>1</sub> C <sub>1</sub> E <sub>1</sub> Y <sub>1</sub> T <sub>1</sub> K <sub>1</sub> D <sub>1</sub> D <sub>1</sub> E <sub>1</sub> S <sub>1</sub> M <sub>1</sub> H <sub>1</sub> V <sub>1</sub> Q <sub>1</sub> E <sub>1</sub> V <sub>1</sub> K <sub>1</sub> I <sub>1</sub> P <sub>1</sub> W <sub>1</sub> Y <sub>1</sub> C <sub>1</sub> S <sub>1</sub> D <sub>1</sub> M <sub>1</sub> D <sub>1</sub> D <sub>1</sub><br>N <sub>1</sub> E <sub>1</sub> E <sub>1</sub> V <sub>1</sub> R <sub>1</sub> S <sub>1</sub> |      |      |      |      |      |      |      |
| 1205                                                                                                                                                                                                                                                                                                                                                                                                                                                                                                                                                                                                                                                                                                                                                                                                                                                                                                                                                                                                                                                                                                                                                                                                                                                                                                                                                                                                                                                                                                                                                                                                                                                                                                                                                                                                                                                                                                                           | 1210 | 1215 | 1220 | 1225 | 1230 | 1235 | 1240 |
| D <sub>2</sub> D <sub>2</sub> F <sub>2</sub> I <sub>2</sub> V <sub>2</sub> K <sub>2</sub> L <sub>2</sub> A <sub>2</sub> E <sub>2</sub> C <sub>2</sub> V <sub>2</sub> K <sub>2</sub> A <sub>2</sub> A <sub>2</sub> K <sub>10</sub> P <sub>2</sub> K <sub>2</sub> L <sub>2</sub> S <sub>12</sub> S <sub>2</sub> G <sub>2</sub> Y <sub>2</sub> K <sub>2</sub> V <sub>2</sub> D <sub>2</sub> N <sub>2</sub> V <sub>2</sub> D <sub>2</sub> F <sub>2</sub> H <sub>2</sub> T <sub>2</sub> V <sub>2</sub> A <sub>2</sub> H <sub>2</sub> K <sub>2</sub> M <sub>2</sub> S <sub>13</sub> V <sub>2</sub> G <sub>2</sub> E <sub>2</sub><br>V <sub>4</sub> K <sub>4</sub> L <sub>4</sub> A <sub>4</sub> E <sub>4</sub> C <sub>4</sub> V <sub>4</sub> K <sub>4</sub> A <sub>4</sub> S <sub>4</sub> K <sub>4</sub> P <sub>4</sub> K <sub>4</sub> L <sub>4</sub> S <sub>4</sub> S <sub>4</sub> G <sub>4</sub> Y <sub>4</sub> G <sub>4</sub> V <sub>4</sub> D <sub>4</sub> N <sub>4</sub> V <sub>4</sub> D <sub>4</sub> F <sub>4</sub> H <sub>4</sub> T <sub>4</sub> V <sub>4</sub> A <sub>4</sub> V <sub>4</sub> K <sub>4</sub> M <sub>4</sub> S <sub>4</sub> V <sub>4</sub> G <sub>4</sub> E <sub>4</sub> G <sub>4</sub> N <sub>4</sub> I <sub>4</sub> D <sub>4</sub><br>F <sub>1</sub> I <sub>1</sub> V <sub>1</sub> K <sub>1</sub> L <sub>1</sub> A <sub>1</sub> E <sub>1</sub> C <sub>1</sub> V <sub>1</sub> K <sub>1</sub> A <sub>1</sub> A <sub>1</sub> P <sub>1</sub> L <sub>1</sub> S <sub>1</sub> F <sub>1</sub> K <sub>1</sub> Y <sub>1</sub> K <sub>1</sub> V <sub>1</sub> D <sub>1</sub> N <sub>1</sub> V <sub>1</sub> D <sub>1</sub> F <sub>1</sub> H <sub>1</sub> T <sub>1</sub> A <sub>1</sub> H <sub>1</sub> K <sub>1</sub> M <sub>1</sub> S <sub>1</sub> V <sub>1</sub> E <sub>1</sub> S <sub>1</sub> N <sub>1</sub><br>S <sub>1</sub>                                                                                         |      |      |      |      |      |      |      |
| 1245                                                                                                                                                                                                                                                                                                                                                                                                                                                                                                                                                                                                                                                                                                                                                                                                                                                                                                                                                                                                                                                                                                                                                                                                                                                                                                                                                                                                                                                                                                                                                                                                                                                                                                                                                                                                                                                                                                                           | 1250 | 1255 | 1260 | 1265 | 1270 | 1275 | 1280 |
| S <sub>2</sub> N <sub>2</sub> I <sub>2</sub> D <sub>2</sub> E <sub>2</sub> S <sub>2</sub> S <sub>2</sub> A <sub>2</sub> L <sub>2</sub> V <sub>2</sub> A <sub>2</sub> T <sub>2</sub> I <sub>2</sub> L <sub>2</sub> D <sub>2</sub> E <sub>2</sub> V <sub>2</sub> K <sub>2</sub> Q <sub>2</sub> W <sub>2</sub> S <sub>2</sub> D <sub>2</sub> G <sub>2</sub> M <sub>2</sub> T <sub>2</sub> Y <sub>2</sub> H <sub>2</sub> S <sub>2</sub> S <sub>2</sub> T <sub>2</sub> P <sub>2</sub> S <sub>2</sub> N <sub>2</sub> K <sub>2</sub> S <sub>2</sub> L <sub>2</sub> M <sub>2</sub> S <sub>2</sub> L <sub>2</sub> M <sub>2</sub><br>E <sub>4</sub> S <sub>4</sub> S <sub>4</sub> S <sub>4</sub> L <sub>4</sub> V <sub>4</sub> A <sub>4</sub> T <sub>4</sub> I <sub>4</sub> L <sub>4</sub> D <sub>4</sub> E <sub>4</sub> V <sub>4</sub> K <sub>4</sub> Q <sub>4</sub> W <sub>4</sub> S <sub>4</sub> D <sub>4</sub> G <sub>4</sub> M <sub>4</sub> T <sub>4</sub> Y <sub>4</sub> H <sub>4</sub> S <sub>4</sub> S <sub>4</sub> T <sub>4</sub> P <sub>4</sub> R <sub>4</sub> N <sub>4</sub> K <sub>4</sub> S <sub>4</sub> L <sub>4</sub> M <sub>4</sub> S <sub>4</sub> L <sub>4</sub> M <sub>4</sub> V <sub>4</sub> G <sub>4</sub> W <sub>4</sub> I <sub>4</sub><br>I <sub>1</sub> D <sub>1</sub> E <sub>1</sub> S <sub>1</sub> A <sub>1</sub> L <sub>1</sub> V <sub>1</sub> A <sub>1</sub> T <sub>1</sub> I <sub>1</sub> L <sub>1</sub> D <sub>1</sub> E <sub>1</sub> V <sub>1</sub> K <sub>1</sub> Q <sub>1</sub> W <sub>1</sub> S <sub>1</sub> D <sub>1</sub> G <sub>1</sub> M <sub>1</sub> T <sub>1</sub> Y <sub>1</sub> H <sub>1</sub> S <sub>1</sub> S <sub>1</sub> T <sub>1</sub> P <sub>1</sub> S <sub>2</sub> N <sub>1</sub> K <sub>1</sub> S <sub>1</sub> L <sub>1</sub> M <sub>1</sub> S <sub>1</sub> L <sub>1</sub> M <sub>1</sub> V <sub>1</sub> G <sub>1</sub>                                                                 |      |      |      |      |      |      |      |
| 1285                                                                                                                                                                                                                                                                                                                                                                                                                                                                                                                                                                                                                                                                                                                                                                                                                                                                                                                                                                                                                                                                                                                                                                                                                                                                                                                                                                                                                                                                                                                                                                                                                                                                                                                                                                                                                                                                                                                           | 1290 | 1295 | 1300 | 1305 | 1310 | 1315 | 1320 |
| V <sub>2</sub> G <sub>2</sub> W <sub>2</sub> I <sub>2</sub> P <sub>2</sub> R <sub>2</sub> K <sub>2</sub> A <sub>2</sub> E <sub>2</sub> S <sub>2</sub> T <sub>2</sub> K <sub>2</sub> A <sub>2</sub> M <sub>2</sub> L <sub>2</sub> D <sub>2</sub> E <sub>2</sub> R <sub>2</sub> V <sub>2</sub> Q <sub>2</sub> S <sub>2</sub> L <sub>14</sub> E <sub>2</sub> L <sub>10</sub> L <sub>13</sub> L <sub>2</sub> N <sub>2</sub> Q <sub>2</sub> L <sub>2</sub> N <sub>2</sub> G <sub>2</sub> V <sub>2</sub> K <sub>2</sub> G <sub>2</sub> V <sub>2</sub> D <sub>2</sub> D <sub>2</sub> Y <sub>2</sub> E <sub>2</sub> S <sub>2</sub><br>P <sub>4</sub> R <sub>4</sub> K <sub>4</sub> A <sub>4</sub> E <sub>4</sub> K <sub>4</sub> T <sub>4</sub> K <sub>4</sub> A <sub>4</sub> I <sub>4</sub> L <sub>4</sub> D <sub>4</sub> E <sub>4</sub> R <sub>4</sub> V <sub>4</sub> Q <sub>4</sub> R <sub>4</sub> L <sub>4</sub> E <sub>4</sub> L <sub>4</sub> L <sub>4</sub> N <sub>4</sub> Q <sub>4</sub> N <sub>4</sub> G <sub>4</sub> V <sub>4</sub> S <sub>4</sub> G <sub>4</sub> I <sub>4</sub> D <sub>4</sub> D <sub>4</sub> Y <sub>4</sub> E <sub>4</sub> S <sub>4</sub> L <sub>4</sub> V <sub>4</sub> S <sub>4</sub> F <sub>4</sub><br>W <sub>1</sub> I <sub>1</sub> P <sub>1</sub> R <sub>1</sub> K <sub>1</sub> A <sub>1</sub> E <sub>1</sub> S <sub>1</sub> T <sub>1</sub> K <sub>1</sub> A <sub>1</sub> M <sub>1</sub> L <sub>1</sub> D <sub>1</sub> E <sub>1</sub> R <sub>1</sub> V <sub>1</sub> Q <sub>1</sub> S <sub>1</sub> E <sub>1</sub> L <sub>1</sub> Q <sub>1</sub> L <sub>1</sub> N <sub>1</sub> G <sub>1</sub> V <sub>1</sub> K <sub>1</sub> G <sub>1</sub> V <sub>1</sub> D <sub>1</sub> D <sub>1</sub> Y <sub>1</sub> E <sub>1</sub> S <sub>1</sub> L <sub>1</sub> V <sub>1</sub>                                                                                                                                         |      |      |      |      |      |      |      |
| 1325                                                                                                                                                                                                                                                                                                                                                                                                                                                                                                                                                                                                                                                                                                                                                                                                                                                                                                                                                                                                                                                                                                                                                                                                                                                                                                                                                                                                                                                                                                                                                                                                                                                                                                                                                                                                                                                                                                                           | 1330 | 1335 | 1340 | 1345 | 1350 | 1355 | 1360 |
| L <sub>2</sub> V <sub>2</sub> S <sub>2</sub> F <sub>2</sub> S <sub>2</sub> E <sub>2</sub> N <sub>2</sub> P <sub>2</sub> H <sub>2</sub> S <sub>2</sub> A <sub>2</sub> E <sub>2</sub> Y <sub>2</sub> L <sub>2</sub> E <sub>2</sub> A <sub>2</sub> Q <sub>2</sub> C <sub>2</sub> A <sub>2</sub> S <sub>2</sub> D <sub>2</sub> Y <sub>2</sub> I <sub>2</sub> E <sub>2</sub> E <sub>2</sub> K <sub>2</sub> V <sub>2</sub> M <sub>2</sub> N <sub>1</sub> V <sub>2</sub> K <sub>2</sub> K <sub>13</sub> N <sub>2</sub> Y <sub>2</sub> D <sub>2</sub> K <sub>2</sub> P <sub>2</sub> I <sub>2</sub> I <sub>2</sub><br>F <sub>4</sub> S <sub>4</sub> E <sub>4</sub> N <sub>4</sub> P <sub>4</sub> H <sub>4</sub> S <sub>4</sub> A <sub>4</sub> E <sub>4</sub> Y <sub>4</sub> L <sub>4</sub> E <sub>4</sub> A <sub>4</sub> Q <sub>4</sub> C <sub>4</sub> A <sub>4</sub> S <sub>4</sub> D <sub>4</sub> Y <sub>4</sub> I <sub>4</sub> E <sub>4</sub> E <sub>4</sub> K <sub>4</sub> V <sub>4</sub> M <sub>4</sub> N <sub>2</sub> V <sub>4</sub> K <sub>4</sub> R <sub>4</sub> K <sub>4</sub> Y <sub>4</sub> D <sub>4</sub> Y <sub>4</sub> P <sub>4</sub> M <sub>4</sub> I <sub>4</sub> I <sub>4</sub> G <sub>4</sub> L <sub>4</sub> V <sub>4</sub><br>S <sub>1</sub> F <sub>1</sub> F <sub>1</sub> S <sub>1</sub> E <sub>1</sub> N <sub>1</sub> P <sub>1</sub> H <sub>1</sub> S <sub>1</sub> A <sub>1</sub> E <sub>1</sub> Y <sub>1</sub> L <sub>1</sub> E <sub>1</sub> A <sub>1</sub> Q <sub>1</sub> C <sub>1</sub> A <sub>1</sub> S <sub>1</sub> D <sub>1</sub> Y <sub>1</sub> I <sub>1</sub> E <sub>1</sub> E <sub>1</sub> K <sub>1</sub> S <sub>1</sub> M <sub>1</sub> N <sub>1</sub> S <sub>1</sub> K <sub>1</sub> N <sub>1</sub> D <sub>1</sub> K <sub>1</sub> P <sub>1</sub> V <sub>1</sub> I <sub>1</sub> G <sub>1</sub><br>V <sub>1</sub> V <sub>1</sub> S <sub>1</sub>                                                             |      |      |      |      |      |      |      |
| 1365                                                                                                                                                                                                                                                                                                                                                                                                                                                                                                                                                                                                                                                                                                                                                                                                                                                                                                                                                                                                                                                                                                                                                                                                                                                                                                                                                                                                                                                                                                                                                                                                                                                                                                                                                                                                                                                                                                                           | 1370 | 1375 | 1380 | 1385 | 1390 | 1395 | 1400 |
| I <sub>2</sub> G <sub>2</sub> L <sub>2</sub> V <sub>2</sub> G <sub>2</sub> L <sub>2</sub> A <sub>2</sub> V <sub>2</sub> A <sub>2</sub> T <sub>2</sub> I <sub>2</sub> G <sub>2</sub> T <sub>2</sub> F <sub>2</sub> A <sub>2</sub> Y <sub>2</sub> W <sub>2</sub> Y <sub>2</sub> M <sub>2</sub> S <sub>2</sub> S <sub>11</sub> N <sub>2</sub> A <sub>2</sub> A <sub>2</sub> S <sub>2</sub> E <sub>2</sub> V <sub>2</sub> V <sub>2</sub> E <sub>2</sub> S <sub>2</sub> Q <sub>2</sub> A <sub>2</sub> K <sub>16</sub> H <sub>2</sub> K <sub>2</sub> Y <sub>2</sub> N <sub>2</sub> R <sub>2</sub> D <sub>2</sub> K <sub>2</sub> R <sub>2</sub><br>G <sub>4</sub> L <sub>4</sub> A <sub>4</sub> L <sub>4</sub> A <sub>4</sub> T <sub>4</sub> G <sub>4</sub> T <sub>4</sub> F <sub>4</sub> A <sub>4</sub> Y <sub>4</sub> W <sub>4</sub> Y <sub>4</sub> M <sub>4</sub> R <sub>4</sub> S <sub>4</sub> E <sub>4</sub> A <sub>4</sub> A <sub>4</sub> A <sub>4</sub> E <sub>4</sub> V <sub>4</sub> V <sub>4</sub> E <sub>4</sub> K <sub>4</sub> Q <sub>4</sub> A <sub>4</sub> K <sub>4</sub> H <sub>4</sub> K <sub>4</sub> Y <sub>4</sub> N <sub>4</sub> R <sub>4</sub> D <sub>4</sub> K <sub>4</sub> S <sub>4</sub> T <sub>4</sub> G <sub>4</sub> S <sub>4</sub> L <sub>4</sub><br>L <sub>1</sub> V <sub>1</sub> G <sub>1</sub> V <sub>1</sub> S <sub>1</sub> T <sub>1</sub> F <sub>1</sub> A <sub>1</sub> L <sub>1</sub> M <sub>1</sub> S <sub>1</sub> L <sub>3</sub> N <sub>1</sub> A <sub>1</sub> S <sub>1</sub> E <sub>1</sub> V <sub>1</sub> V <sub>1</sub> E <sub>1</sub> I <sub>1</sub> G <sub>1</sub> A <sub>1</sub> H <sub>1</sub> Y <sub>1</sub> N <sub>1</sub> F <sub>1</sub> D <sub>1</sub> K <sub>1</sub> R <sub>1</sub> T <sub>1</sub> G <sub>1</sub><br>T <sub>1</sub> G <sub>1</sub> W <sub>1</sub> S <sub>1</sub> Q <sub>1</sub> R <sub>1</sub>                                                                           |      |      |      |      |      |      |      |
| 1405                                                                                                                                                                                                                                                                                                                                                                                                                                                                                                                                                                                                                                                                                                                                                                                                                                                                                                                                                                                                                                                                                                                                                                                                                                                                                                                                                                                                                                                                                                                                                                                                                                                                                                                                                                                                                                                                                                                           | 1410 | 1415 | 1420 | 1425 | 1430 | 1435 | 1440 |
| T <sub>2</sub> G <sub>2</sub> S <sub>2</sub> L <sub>2</sub> M <sub>2</sub> Y <sub>2</sub> D <sub>10</sub> L <sub>2</sub> D <sub>2</sub> D <sub>10</sub> Q <sub>2</sub> G <sub>2</sub> T <sub>2</sub> V <sub>2</sub> E <sub>2</sub> T <sub>2</sub> F <sub>2</sub> G <sub>2</sub> V <sub>2</sub> E <sub>2</sub> Y <sub>2</sub> S <sub>2</sub> D <sub>2</sub> A <sub>2</sub> V <sub>2</sub> M <sub>12</sub> T <sub>2</sub> G <sub>2</sub> K <sub>2</sub> M <sub>2</sub> S <sub>2</sub> K <sub>2</sub> A <sub>2</sub> Q <sub>2</sub> K <sub>2</sub> E <sub>10</sub> R <sub>2</sub> E <sub>2</sub> S <sub>2</sub> R <sub>2</sub><br>M <sub>4</sub> F <sub>4</sub> D <sub>4</sub> Y <sub>4</sub> S <sub>4</sub> D <sub>4</sub> Q <sub>4</sub> D <sub>4</sub> T <sub>4</sub> V <sub>4</sub> E <sub>4</sub> T <sub>4</sub> F <sub>4</sub> G <sub>4</sub> V <sub>4</sub> E <sub>4</sub> Y <sub>4</sub> S <sub>4</sub> D <sub>4</sub> A <sub>4</sub> V <sub>4</sub> I <sub>4</sub> T <sub>4</sub> G <sub>4</sub> K <sub>4</sub> G <sub>4</sub> S <sub>4</sub> K <sub>4</sub> A <sub>4</sub> Q <sub>4</sub> K <sub>4</sub> E <sub>4</sub> R <sub>4</sub> E <sub>4</sub> S <sub>4</sub> R <sub>4</sub> K <sub>4</sub> K <sub>4</sub> G <sub>4</sub> W <sub>4</sub><br>S <sub>1</sub> L <sub>1</sub> M <sub>1</sub> D <sub>1</sub> L <sub>1</sub> Q <sub>1</sub> T <sub>1</sub> S <sub>1</sub> E <sub>1</sub> T <sub>1</sub> F <sub>1</sub> G <sub>1</sub> V <sub>1</sub> E <sub>1</sub> Y <sub>1</sub> S <sub>1</sub> D <sub>1</sub> A <sub>1</sub> V <sub>1</sub> M <sub>1</sub> T <sub>1</sub> I <sub>1</sub> K <sub>1</sub> M <sub>1</sub> S <sub>1</sub> K <sub>1</sub> A <sub>1</sub> Q <sub>1</sub> K <sub>1</sub> R <sub>1</sub> S <sub>1</sub> R <sub>1</sub> K <sub>1</sub> K <sub>1</sub><br>Y <sub>1</sub> N <sub>1</sub> V <sub>1</sub>                                                                                        |      |      |      |      |      |      |      |
| 1445                                                                                                                                                                                                                                                                                                                                                                                                                                                                                                                                                                                                                                                                                                                                                                                                                                                                                                                                                                                                                                                                                                                                                                                                                                                                                                                                                                                                                                                                                                                                                                                                                                                                                                                                                                                                                                                                                                                           | 1450 | 1455 | 1460 | 1465 | 1470 | 1475 | 1480 |
| K <sub>13</sub> K <sub>2</sub> G <sub>13</sub> W <sub>2</sub> K <sub>2</sub> V <sub>2</sub> G <sub>2</sub> K <sub>2</sub> V <sub>2</sub> N <sub>2</sub> R <sub>2</sub> P <sub>2</sub> M <sub>2</sub> R <sub>2</sub> V <sub>2</sub> F <sub>2</sub> R <sub>2</sub> Q <sub>2</sub> L <sub>2</sub> Y <sub>2</sub> G <sub>2</sub> V <sub>2</sub> N <sub>2</sub> P <sub>2</sub> L <sub>2</sub> E <sub>2</sub> F <sub>2</sub> D <sub>2</sub> E <sub>2</sub> V <sub>13</sub> V <sub>2</sub> M <sub>2</sub> R <sub>2</sub> V <sub>2</sub> G <sub>2</sub> E <sub>2</sub> L <sub>2</sub> T <sub>2</sub> S <sub>11</sub> E <sub>2</sub><br>G <sub>1</sub> I <sub>1</sub> K <sub>1</sub> K <sub>1</sub> V <sub>4</sub> N <sub>4</sub> R <sub>4</sub> P <sub>4</sub> M <sub>4</sub> R <sub>4</sub> V <sub>4</sub> F <sub>4</sub> H <sub>4</sub> Q <sub>4</sub> L <sub>4</sub> Y <sub>4</sub> G <sub>4</sub> V <sub>4</sub> N <sub>4</sub> P <sub>4</sub> L <sub>4</sub> E <sub>4</sub> F <sub>4</sub> D <sub>4</sub> E <sub>4</sub> V <sub>4</sub> V <sub>4</sub> M <sub>4</sub> R <sub>4</sub> M <sub>1</sub> G <sub>4</sub> D <sub>4</sub> W <sub>4</sub> A <sub>4</sub> T <sub>4</sub> D <sub>4</sub> P <sub>4</sub> W <sub>4</sub> T <sub>4</sub> A <sub>4</sub><br>W <sub>1</sub> V <sub>1</sub> G <sub>1</sub> K <sub>1</sub> V <sub>1</sub> D <sub>1</sub> R <sub>1</sub> P <sub>1</sub> M <sub>1</sub> R <sub>1</sub> V <sub>1</sub> F <sub>1</sub> R <sub>1</sub> Q <sub>1</sub> L <sub>1</sub> Y <sub>1</sub> G <sub>1</sub> V <sub>1</sub> N <sub>1</sub> P <sub>1</sub> L <sub>1</sub> E <sub>1</sub> F <sub>1</sub> D <sub>1</sub> I <sub>1</sub> V <sub>1</sub> V <sub>1</sub> R <sub>1</sub> V <sub>1</sub> G <sub>1</sub> E <sub>1</sub> L <sub>1</sub> T <sub>1</sub> S <sub>1</sub> E <sub>1</sub> P <sub>1</sub> W <sub>1</sub><br>E <sub>1</sub>                                                                         |      |      |      |      |      |      |      |
| 1485                                                                                                                                                                                                                                                                                                                                                                                                                                                                                                                                                                                                                                                                                                                                                                                                                                                                                                                                                                                                                                                                                                                                                                                                                                                                                                                                                                                                                                                                                                                                                                                                                                                                                                                                                                                                                                                                                                                           | 1490 | 1495 | 1500 | 1505 | 1510 | 1515 | 1520 |
| P <sub>2</sub> W <sub>2</sub> S <sub>2</sub> A <sub>2</sub> K <sub>2</sub> D <sub>14</sub> V <sub>2</sub> D <sub>10</sub> I <sub>2</sub> D <sub>2</sub> N <sub>2</sub> M <sub>2</sub> L <sub>2</sub> V <sub>2</sub> E <sub>2</sub> L <sub>2</sub> D <sub>10</sub> D <sub>2</sub> D <sub>2</sub> F <sub>7</sub> H <sub>2</sub> I <sub>2</sub> L <sub>2</sub> S <sub>2</sub> G <sub>2</sub> D <sub>2</sub> S <sub>2</sub> M <sub>2</sub> L <sub>2</sub> G <sub>2</sub> K <sub>2</sub> K <sub>2</sub> V <sub>2</sub> E <sub>2</sub> L <sub>2</sub> A <sub>2</sub> F <sub>2</sub> T <sub>2</sub> K <sub>2</sub> D <sub>12</sub><br>K <sub>4</sub> D <sub>3</sub> V <sub>4</sub> N <sub>4</sub> V <sub>4</sub> G <sub>4</sub> M <sub>4</sub> L <sub>4</sub> I <sub>4</sub> E <sub>4</sub> L <sub>4</sub> D <sub>4</sub> D <sub>4</sub> D <sub>4</sub> Y <sub>4</sub> H <sub>4</sub> I <sub>4</sub> L <sub>4</sub> K <sub>4</sub> D <sub>4</sub> D <sub>4</sub> R <sub>4</sub> M <sub>4</sub> L <sub>4</sub> G <sub>4</sub> K <sub>4</sub> K <sub>4</sub> V <sub>4</sub> E <sub>4</sub> L <sub>4</sub> A <sub>4</sub> F <sub>4</sub> T <sub>4</sub> K <sub>4</sub> S <sub>4</sub> G <sub>4</sub> S <sub>4</sub> G <sub>2</sub> S <sub>1</sub><br>S <sub>1</sub> A <sub>1</sub> K <sub>1</sub> D <sub>1</sub> I <sub>1</sub> N <sub>1</sub> M <sub>1</sub> L <sub>1</sub> V <sub>1</sub> E <sub>1</sub> I <sub>2</sub> D <sub>1</sub> Y <sub>1</sub> H <sub>1</sub> Y <sub>2</sub> L <sub>1</sub> S <sub>1</sub> G <sub>1</sub> K <sub>1</sub> F <sub>1</sub> M <sub>1</sub> L <sub>1</sub> G <sub>1</sub> K <sub>1</sub> K <sub>1</sub> V <sub>1</sub> E <sub>1</sub> L <sub>1</sub> A <sub>1</sub> F <sub>1</sub> T <sub>1</sub> K <sub>1</sub> D <sub>1</sub> S <sub>2</sub> N <sub>1</sub><br>L <sub>1</sub> I <sub>1</sub> D <sub>1</sub> S <sub>1</sub> E <sub>1</sub> N <sub>1</sub>                                           |      |      |      |      |      |      |      |
| 1525                                                                                                                                                                                                                                                                                                                                                                                                                                                                                                                                                                                                                                                                                                                                                                                                                                                                                                                                                                                                                                                                                                                                                                                                                                                                                                                                                                                                                                                                                                                                                                                                                                                                                                                                                                                                                                                                                                                           | 1530 | 1535 | 1540 | 1545 | 1550 | 1555 | 1560 |
| G <sub>2</sub> S <sub>2</sub> N <sub>2</sub> E <sub>2</sub> E <sub>2</sub> T <sub>2</sub> V <sub>2</sub> V <sub>2</sub> K <sub>2</sub> L <sub>2</sub> T <sub>2</sub> P <sub>2</sub> H <sub>2</sub> R <sub>2</sub> S <sub>12</sub> K <sub>2</sub> M <sub>13</sub> A <sub>2</sub> S <sub>2</sub> S <sub>1</sub> M <sub>2</sub> S <sub>10</sub> L <sub>2</sub> N <sub>2</sub> P <sub>13</sub> M <sub>2</sub> G <sub>2</sub> F <sub>2</sub> P <sub>2</sub> E <sub>10</sub> E <sub>2</sub> E <sub>2</sub> G <sub>2</sub> R <sub>2</sub> W <sub>2</sub> S <sub>12</sub> Q <sub>2</sub> T <sub>2</sub> G <sub>2</sub> S <sub>2</sub><br>E <sub>4</sub> T <sub>4</sub> V <sub>4</sub> V <sub>4</sub> K <sub>4</sub> L <sub>4</sub> T <sub>4</sub> P <sub>4</sub> H <sub>4</sub> R <sub>4</sub> S <sub>4</sub> S <sub>4</sub> M <sub>4</sub> A <sub>4</sub> M <sub>4</sub> S <sub>4</sub> S <sub>1</sub> S <sub>5</sub> L <sub>4</sub> P <sub>4</sub> M <sub>4</sub> G <sub>4</sub> F <sub>4</sub> G <sub>4</sub> E <sub>4</sub> E <sub>4</sub> E <sub>4</sub> G <sub>4</sub> R <sub>4</sub> W <sub>4</sub> S <sub>4</sub> Q <sub>4</sub> T <sub>4</sub> G <sub>4</sub> N <sub>1</sub> P <sub>4</sub> V <sub>4</sub> V <sub>4</sub> Q <sub>2</sub><br>S <sub>1</sub> E <sub>1</sub> E <sub>1</sub> T <sub>1</sub> Q <sub>1</sub> V <sub>1</sub> K <sub>1</sub> L <sub>1</sub> T <sub>1</sub> P <sub>1</sub> H <sub>1</sub> R <sub>1</sub> S <sub>1</sub> K <sub>1</sub> A <sub>1</sub> M <sub>1</sub> L <sub>1</sub> P <sub>1</sub> S <sub>4</sub> F <sub>1</sub> P <sub>1</sub> E <sub>1</sub> G <sub>1</sub> R <sub>1</sub> W <sub>1</sub> S <sub>1</sub> Q <sub>1</sub> T <sub>1</sub> G <sub>1</sub> S <sub>1</sub> P <sub>1</sub> R <sub>1</sub><br>V <sub>1</sub> M <sub>1</sub> V <sub>1</sub>                                                                                                                                   |      |      |      |      |      |      |      |



| 1565                                                                                                                                                                                                                                                                                                                                                                                                                                                                                                                                                                                                                                                                                                                                                                                                                                                                                                                                                                                                                                                                                                                                                                                                                                                                                                                                                                                                                                                                                                                                                                                                                                                                                                                                                                                                                                                                                                                                                                                                                                                                          | 1570 | 1575 | 1580 | 1585 | 1590 | 1595 | 1600 |
|-------------------------------------------------------------------------------------------------------------------------------------------------------------------------------------------------------------------------------------------------------------------------------------------------------------------------------------------------------------------------------------------------------------------------------------------------------------------------------------------------------------------------------------------------------------------------------------------------------------------------------------------------------------------------------------------------------------------------------------------------------------------------------------------------------------------------------------------------------------------------------------------------------------------------------------------------------------------------------------------------------------------------------------------------------------------------------------------------------------------------------------------------------------------------------------------------------------------------------------------------------------------------------------------------------------------------------------------------------------------------------------------------------------------------------------------------------------------------------------------------------------------------------------------------------------------------------------------------------------------------------------------------------------------------------------------------------------------------------------------------------------------------------------------------------------------------------------------------------------------------------------------------------------------------------------------------------------------------------------------------------------------------------------------------------------------------------|------|------|------|------|------|------|------|
| P <sub>9</sub> V <sub>6</sub> V <sub>9</sub> Q <sub>2</sub> K <sub>7</sub> S <sub>8</sub> S <sub>8</sub> E <sub>8</sub> E <sub>9</sub> N <sub>7</sub> Q <sub>9</sub> S <sub>9</sub> V <sub>10</sub> E <sub>9</sub> K <sub>13</sub> Q <sub>9</sub> V <sub>9</sub> A <sub>9</sub> K <sub>9</sub> P <sub>9</sub> E <sub>9</sub> T <sub>9</sub> T <sub>9</sub> N <sub>9</sub> P <sub>9</sub> Y <sub>9</sub> E <sub>9</sub> H <sub>9</sub> V <sub>10</sub> L <sub>9</sub> V <sub>9</sub> R <sub>9</sub> L <sub>9</sub> G <sub>9</sub> S <sub>9</sub> A <sub>9</sub> H <sub>9</sub> L <sub>9</sub> G <sub>9</sub> T <sub>9</sub><br>K <sub>4</sub> S <sub>4</sub> F <sub>2</sub> E <sub>4</sub> D <sub>3</sub> G <sub>3</sub> Q <sub>3</sub> T <sub>4</sub> V <sub>4</sub> E <sub>4</sub> M <sub>3</sub> Q <sub>3</sub> I <sub>1</sub> A <sub>1</sub> V <sub>1</sub> P <sub>1</sub> E <sub>4</sub> T <sub>2</sub> T <sub>4</sub> N <sub>4</sub> P <sub>4</sub> Y <sub>4</sub> E <sub>4</sub> H <sub>4</sub> V <sub>4</sub> L <sub>4</sub> V <sub>5</sub> R <sub>4</sub> L <sub>4</sub> G <sub>4</sub> S <sub>4</sub> A <sub>4</sub> H <sub>4</sub> L <sub>4</sub> G <sub>4</sub> T <sub>4</sub> S <sub>4</sub> V <sub>4</sub> L <sub>4</sub> N <sub>4</sub><br>V <sub>1</sub> M <sub>3</sub> K <sub>1</sub> S <sub>1</sub> S <sub>2</sub> K <sub>1</sub> E <sub>1</sub> K <sub>1</sub> Q <sub>1</sub> S <sub>2</sub> T <sub>1</sub> E <sub>1</sub> K <sub>1</sub> Q <sub>1</sub> A <sub>1</sub> K <sub>1</sub> V <sub>2</sub> E <sub>1</sub> T <sub>1</sub> T <sub>1</sub> N <sub>1</sub> P <sub>1</sub> Y <sub>1</sub> E <sub>1</sub> H <sub>1</sub> L <sub>1</sub> R <sub>1</sub> L <sub>1</sub> G <sub>1</sub> S <sub>1</sub> A <sub>1</sub> H <sub>1</sub> L <sub>1</sub> G <sub>1</sub> T <sub>1</sub> S <sub>1</sub> S <sub>1</sub><br>K <sub>1</sub> T <sub>1</sub> E <sub>2</sub> D <sub>1</sub> H <sub>1</sub> N <sub>1</sub> D <sub>1</sub> V <sub>1</sub> P <sub>1</sub> V <sub>1</sub><br>L <sub>1</sub> S <sub>1</sub> E <sub>1</sub> L <sub>1</sub><br>Q <sub>1</sub> |      |      |      |      |      |      |      |
|                                                                                                                                                                                                                                                                                                                                                                                                                                                                                                                                                                                                                                                                                                                                                                                                                                                                                                                                                                                                                                                                                                                                                                                                                                                                                                                                                                                                                                                                                                                                                                                                                                                                                                                                                                                                                                                                                                                                                                                                                                                                               |      |      |      |      |      |      |      |
| 1605                                                                                                                                                                                                                                                                                                                                                                                                                                                                                                                                                                                                                                                                                                                                                                                                                                                                                                                                                                                                                                                                                                                                                                                                                                                                                                                                                                                                                                                                                                                                                                                                                                                                                                                                                                                                                                                                                                                                                                                                                                                                          | 1610 | 1615 | 1620 | 1625 | 1630 | 1635 | 1640 |
| S <sub>9</sub> V <sub>9</sub> L <sub>9</sub> N <sub>9</sub> C <sub>9</sub> F <sub>9</sub> F <sub>9</sub> H <sub>9</sub> G <sub>9</sub> S <sub>9</sub> K <sub>9</sub> C <sub>9</sub> V <sub>9</sub> M <sub>9</sub> P <sub>9</sub> Y <sub>9</sub> H <sub>9</sub> L <sub>9</sub> A <sub>9</sub> E <sub>9</sub> N <sub>10</sub> G <sub>9</sub> D <sub>9</sub> A <sub>9</sub> N <sub>9</sub> E <sub>9</sub> S <sub>13</sub> L <sub>9</sub> V <sub>9</sub> M <sub>9</sub> S <sub>9</sub> T <sub>9</sub> T <sub>9</sub> R <sub>9</sub> G <sub>9</sub> Q <sub>9</sub> F <sub>10</sub> D <sub>9</sub> F <sub>9</sub> G <sub>9</sub><br>C <sub>4</sub> F <sub>4</sub> F <sub>4</sub> H <sub>4</sub> G <sub>4</sub> S <sub>4</sub> K <sub>4</sub> C <sub>4</sub> V <sub>4</sub> I <sub>4</sub> P <sub>4</sub> Y <sub>4</sub> H <sub>4</sub> L <sub>4</sub> A <sub>4</sub> E <sub>4</sub> N <sub>4</sub> G <sub>4</sub> D <sub>4</sub> L <sub>4</sub> D <sub>4</sub> K <sub>4</sub> S <sub>4</sub> L <sub>4</sub> I <sub>4</sub> I <sub>4</sub> V <sub>1</sub> T <sub>4</sub> T <sub>4</sub> R <sub>4</sub> G <sub>4</sub> Q <sub>4</sub> F <sub>4</sub> D <sub>4</sub> F <sub>4</sub> G <sub>4</sub> P <sub>4</sub> L <sub>4</sub> K <sub>4</sub> N <sub>4</sub><br>L <sub>1</sub> N <sub>1</sub> C <sub>1</sub> F <sub>1</sub> F <sub>1</sub> H <sub>1</sub> G <sub>1</sub> S <sub>1</sub> K <sub>1</sub> C <sub>1</sub> V <sub>1</sub> M <sub>1</sub> P <sub>1</sub> Y <sub>1</sub> H <sub>1</sub> L <sub>1</sub> A <sub>1</sub> E <sub>1</sub> N <sub>1</sub> G <sub>1</sub> S <sub>1</sub> E <sub>1</sub> N <sub>1</sub> E <sub>1</sub> S <sub>1</sub> L <sub>1</sub> M <sub>1</sub> S <sub>1</sub> T <sub>1</sub> T <sub>1</sub> R <sub>1</sub> G <sub>1</sub> Q <sub>1</sub> D <sub>1</sub> G <sub>1</sub> P <sub>1</sub> L <sub>1</sub><br>A <sub>1</sub> P <sub>1</sub> V <sub>1</sub>                                                                                                                                                                                           |      |      |      |      |      |      |      |
|                                                                                                                                                                                                                                                                                                                                                                                                                                                                                                                                                                                                                                                                                                                                                                                                                                                                                                                                                                                                                                                                                                                                                                                                                                                                                                                                                                                                                                                                                                                                                                                                                                                                                                                                                                                                                                                                                                                                                                                                                                                                               |      |      |      |      |      |      |      |
| 1645                                                                                                                                                                                                                                                                                                                                                                                                                                                                                                                                                                                                                                                                                                                                                                                                                                                                                                                                                                                                                                                                                                                                                                                                                                                                                                                                                                                                                                                                                                                                                                                                                                                                                                                                                                                                                                                                                                                                                                                                                                                                          | 1650 | 1655 | 1660 | 1665 | 1670 | 1675 | 1680 |
| P <sub>9</sub> L <sub>9</sub> K <sub>9</sub> N <sub>9</sub> I <sub>9</sub> K <sub>10</sub> C <sub>9</sub> K <sub>9</sub> K <sub>10</sub> M <sub>9</sub> K <sub>9</sub> D <sub>10</sub> Y <sub>9</sub> D <sub>9</sub> M <sub>9</sub> T <sub>9</sub> V <sub>9</sub> C <sub>9</sub> P <sub>10</sub> L <sub>9</sub> P <sub>9</sub> R <sub>9</sub> D <sub>9</sub> V <sub>9</sub> Q <sub>9</sub> P <sub>9</sub> F <sub>9</sub> R <sub>9</sub> A <sub>9</sub> K <sub>9</sub> I <sub>9</sub> V <sub>9</sub> F <sub>9</sub> R <sub>9</sub> E <sub>9</sub> P <sub>9</sub> K <sub>9</sub> L <sub>9</sub> G <sub>9</sub> E <sub>9</sub><br>I <sub>4</sub> K <sub>4</sub> C <sub>4</sub> K <sub>4</sub> K <sub>4</sub> I <sub>4</sub> K <sub>4</sub> D <sub>4</sub> Y <sub>4</sub> D <sub>4</sub> I <sub>4</sub> T <sub>4</sub> V <sub>3</sub> C <sub>4</sub> P <sub>4</sub> L <sub>4</sub> P <sub>4</sub> S <sub>4</sub> D <sub>4</sub> V <sub>4</sub> Q <sub>4</sub> P <sub>4</sub> F <sub>4</sub> S <sub>4</sub> A <sub>4</sub> K <sub>4</sub> M <sub>4</sub> V <sub>4</sub> F <sub>4</sub> S <sub>4</sub> E <sub>4</sub> P <sub>4</sub> K <sub>4</sub> L <sub>4</sub> G <sub>4</sub> E <sub>4</sub> E <sub>4</sub> V <sub>4</sub> V <sub>4</sub> V <sub>4</sub><br>K <sub>1</sub> N <sub>1</sub> I <sub>1</sub> C <sub>1</sub> M <sub>1</sub> Y <sub>1</sub> I <sub>1</sub> T <sub>1</sub> V <sub>1</sub> C <sub>1</sub> L <sub>1</sub> R <sub>1</sub> D <sub>1</sub> V <sub>1</sub> Q <sub>1</sub> P <sub>1</sub> F <sub>1</sub> R <sub>1</sub> A <sub>1</sub> K <sub>1</sub> I <sub>1</sub> V <sub>1</sub> F <sub>1</sub> R <sub>1</sub> E <sub>1</sub> P <sub>1</sub> K <sub>1</sub> L <sub>1</sub> G <sub>1</sub> E <sub>1</sub> E <sub>1</sub><br>M <sub>1</sub> V <sub>1</sub>                                                                                                                                                                                                                                                                                                   |      |      |      |      |      |      |      |
|                                                                                                                                                                                                                                                                                                                                                                                                                                                                                                                                                                                                                                                                                                                                                                                                                                                                                                                                                                                                                                                                                                                                                                                                                                                                                                                                                                                                                                                                                                                                                                                                                                                                                                                                                                                                                                                                                                                                                                                                                                                                               |      |      |      |      |      |      |      |
| 1685                                                                                                                                                                                                                                                                                                                                                                                                                                                                                                                                                                                                                                                                                                                                                                                                                                                                                                                                                                                                                                                                                                                                                                                                                                                                                                                                                                                                                                                                                                                                                                                                                                                                                                                                                                                                                                                                                                                                                                                                                                                                          | 1690 | 1695 | 1700 | 1705 | 1710 | 1715 | 1720 |
| E <sub>9</sub> V <sub>10</sub> V <sub>10</sub> V <sub>9</sub> Y <sub>9</sub> F <sub>9</sub> A <sub>9</sub> S <sub>12</sub> I <sub>13</sub> D <sub>9</sub> G <sub>9</sub> S <sub>7</sub> I <sub>7</sub> V <sub>8</sub> M <sub>9</sub> K <sub>12</sub> V <sub>7</sub> S <sub>9</sub> E <sub>9</sub> K <sub>9</sub> S <sub>13</sub> N <sub>9</sub> T <sub>9</sub> Y <sub>9</sub> Q <sub>9</sub> A <sub>9</sub> G <sub>9</sub> G <sub>9</sub> S <sub>9</sub> F <sub>9</sub> T <sub>12</sub> H <sub>9</sub> L <sub>9</sub> W <sub>9</sub> T <sub>9</sub> Y <sub>9</sub> Q <sub>9</sub> H <sub>9</sub> D <sub>9</sub><br>V <sub>5</sub> C <sub>4</sub> F <sub>4</sub> A <sub>4</sub> S <sub>4</sub> I <sub>4</sub> D <sub>4</sub> G <sub>4</sub> R <sub>4</sub> G <sub>4</sub> V <sub>4</sub> M <sub>4</sub> K <sub>4</sub> V <sub>3</sub> S <sub>4</sub> E <sub>4</sub> S <sub>2</sub> S <sub>4</sub> N <sub>4</sub> T <sub>4</sub> Y <sub>4</sub> T <sub>1</sub> A <sub>4</sub> G <sub>4</sub> G <sub>4</sub> L <sub>4</sub> F <sub>4</sub> T <sub>4</sub> H <sub>4</sub> L <sub>4</sub> W <sub>4</sub> A <sub>4</sub> Y <sub>4</sub> Q <sub>4</sub> Y <sub>4</sub> D <sub>4</sub> G <sub>4</sub> N <sub>4</sub> P <sub>4</sub> G <sub>4</sub><br>F <sub>1</sub> I <sub>2</sub> F <sub>1</sub> A <sub>1</sub> S <sub>1</sub> I <sub>1</sub> N <sub>1</sub> N <sub>3</sub> I <sub>1</sub> V <sub>1</sub> M <sub>1</sub> I <sub>1</sub> A <sub>1</sub> A <sub>2</sub> K <sub>1</sub> S <sub>1</sub> N <sub>1</sub> Y <sub>1</sub> Q <sub>1</sub> A <sub>1</sub> G <sub>1</sub> G <sub>1</sub> S <sub>1</sub> F <sub>1</sub> K <sub>1</sub> H <sub>1</sub> L <sub>1</sub> W <sub>1</sub> T <sub>1</sub> H <sub>1</sub> Q <sub>1</sub> H <sub>1</sub> D <sub>1</sub> F <sub>2</sub> N <sub>1</sub><br>Y <sub>1</sub> Y <sub>1</sub> S <sub>1</sub> A <sub>1</sub> K <sub>1</sub> E <sub>1</sub> S <sub>1</sub> G <sub>1</sub>                                                                                                                                                         |      |      |      |      |      |      |      |
|                                                                                                                                                                                                                                                                                                                                                                                                                                                                                                                                                                                                                                                                                                                                                                                                                                                                                                                                                                                                                                                                                                                                                                                                                                                                                                                                                                                                                                                                                                                                                                                                                                                                                                                                                                                                                                                                                                                                                                                                                                                                               |      |      |      |      |      |      |      |
| 1725                                                                                                                                                                                                                                                                                                                                                                                                                                                                                                                                                                                                                                                                                                                                                                                                                                                                                                                                                                                                                                                                                                                                                                                                                                                                                                                                                                                                                                                                                                                                                                                                                                                                                                                                                                                                                                                                                                                                                                                                                                                                          | 1730 | 1735 | 1740 | 1745 | 1750 | 1755 | 1760 |
| G <sub>9</sub> N <sub>9</sub> P <sub>9</sub> G <sub>13</sub> D <sub>9</sub> C <sub>9</sub> G <sub>9</sub> G <sub>9</sub> P <sub>9</sub> I <sub>9</sub> V <sub>9</sub> A <sub>9</sub> T <sub>9</sub> S <sub>9</sub> D <sub>9</sub> M <sub>9</sub> K <sub>9</sub> V <sub>9</sub> V <sub>9</sub> G <sub>13</sub> F <sub>9</sub> H <sub>9</sub> S <sub>13</sub> G <sub>9</sub> V <sub>9</sub> V <sub>9</sub> S <sub>9</sub> N <sub>9</sub> G <sub>10</sub> A <sub>9</sub> G <sub>9</sub> E <sub>9</sub> K <sub>9</sub> L <sub>9</sub> R <sub>9</sub> A <sub>9</sub> V <sub>13</sub> Y <sub>9</sub> T <sub>9</sub> P <sub>9</sub><br>D <sub>4</sub> C <sub>4</sub> G <sub>4</sub> C <sub>4</sub> P <sub>4</sub> I <sub>4</sub> V <sub>4</sub> A <sub>4</sub> T <sub>4</sub> S <sub>4</sub> D <sub>4</sub> L <sub>4</sub> K <sub>4</sub> V <sub>4</sub> V <sub>3</sub> G <sub>4</sub> F <sub>4</sub> H <sub>4</sub> S <sub>4</sub> H <sub>1</sub> V <sub>4</sub> V <sub>3</sub> V <sub>1</sub> N <sub>4</sub> G <sub>4</sub> A <sub>4</sub> G <sub>5</sub> E <sub>4</sub> K <sub>4</sub> L <sub>4</sub> R <sub>4</sub> A <sub>4</sub> V <sub>4</sub> Y <sub>4</sub> T <sub>4</sub> P <sub>4</sub> T <sub>1</sub> N <sub>4</sub> Q <sub>4</sub> E <sub>4</sub><br>P <sub>1</sub> G <sub>1</sub> D <sub>1</sub> G <sub>1</sub> G <sub>1</sub> P <sub>1</sub> I <sub>1</sub> V <sub>1</sub> A <sub>1</sub> T <sub>1</sub> S <sub>1</sub> D <sub>1</sub> M <sub>1</sub> I <sub>1</sub> V <sub>1</sub> V <sub>1</sub> G <sub>1</sub> F <sub>1</sub> S <sub>1</sub> G <sub>1</sub> V <sub>1</sub> S <sub>1</sub> E <sub>1</sub> A <sub>1</sub> E <sub>1</sub> K <sub>1</sub> L <sub>1</sub> R <sub>1</sub> A <sub>1</sub> V <sub>1</sub> Y <sub>1</sub> P <sub>1</sub> V <sub>1</sub> N <sub>1</sub><br>K <sub>1</sub> A <sub>1</sub> N <sub>1</sub>                                                                                                                                                                                                                                      |      |      |      |      |      |      |      |
|                                                                                                                                                                                                                                                                                                                                                                                                                                                                                                                                                                                                                                                                                                                                                                                                                                                                                                                                                                                                                                                                                                                                                                                                                                                                                                                                                                                                                                                                                                                                                                                                                                                                                                                                                                                                                                                                                                                                                                                                                                                                               |      |      |      |      |      |      |      |
| 1765                                                                                                                                                                                                                                                                                                                                                                                                                                                                                                                                                                                                                                                                                                                                                                                                                                                                                                                                                                                                                                                                                                                                                                                                                                                                                                                                                                                                                                                                                                                                                                                                                                                                                                                                                                                                                                                                                                                                                                                                                                                                          | 1770 | 1775 | 1780 | 1785 | 1790 | 1795 | 1800 |
| V <sub>9</sub> N <sub>9</sub> H <sub>9</sub> E <sub>9</sub> L <sub>13</sub> I <sub>13</sub> A <sub>9</sub> S <sub>10</sub> L <sub>9</sub> S <sub>9</sub> T <sub>9</sub> E <sub>9</sub> I <sub>9</sub> Q <sub>9</sub> M <sub>9</sub> T <sub>13</sub> D <sub>9</sub> F <sub>9</sub> W <sub>9</sub> T <sub>9</sub> F <sub>9</sub> N <sub>9</sub> P <sub>9</sub> D <sub>9</sub> L <sub>9</sub> V <sub>9</sub> E <sub>9</sub> W <sub>9</sub> N <sub>9</sub> S <sub>9</sub> V <sub>9</sub> A <sub>9</sub> R <sub>9</sub> V <sub>9</sub> S <sub>9</sub> T <sub>9</sub> F <sub>9</sub> F <sub>9</sub> P <sub>9</sub> M <sub>10</sub><br>L <sub>4</sub> I <sub>4</sub> S <sub>4</sub> S <sub>4</sub> V <sub>4</sub> S <sub>4</sub> S <sub>4</sub> E <sub>4</sub> V <sub>4</sub> Q <sub>4</sub> M <sub>4</sub> N <sub>4</sub> D <sub>4</sub> F <sub>4</sub> W <sub>4</sub> F <sub>4</sub> F <sub>4</sub> N <sub>4</sub> P <sub>4</sub> D <sub>2</sub> L <sub>4</sub> V <sub>4</sub> E <sub>4</sub> W <sub>4</sub> N <sub>4</sub> S <sub>4</sub> V <sub>4</sub> A <sub>4</sub> R <sub>4</sub> V <sub>4</sub> S <sub>4</sub> T <sub>4</sub> F <sub>4</sub> F <sub>4</sub> P <sub>4</sub> M <sub>4</sub> Y <sub>4</sub> K <sub>4</sub> A <sub>4</sub> I <sub>4</sub><br>H <sub>1</sub> E <sub>1</sub> L <sub>1</sub> I <sub>1</sub> V <sub>2</sub> T <sub>1</sub> D <sub>1</sub> V <sub>1</sub> T <sub>1</sub> M <sub>1</sub> T <sub>1</sub> D <sub>1</sub> W <sub>1</sub> T <sub>1</sub> F <sub>1</sub> K <sub>1</sub> P <sub>1</sub> D <sub>1</sub> L <sub>1</sub> N <sub>1</sub> E <sub>1</sub> W <sub>1</sub> N <sub>1</sub> S <sub>1</sub> V <sub>1</sub> A <sub>1</sub> R <sub>1</sub> V <sub>1</sub> S <sub>1</sub> T <sub>1</sub> F <sub>1</sub> F <sub>1</sub> S <sub>1</sub> M <sub>1</sub> T <sub>1</sub> K <sub>1</sub><br>K <sub>1</sub> L <sub>1</sub> Q <sub>1</sub> N <sub>1</sub> V <sub>1</sub> P <sub>1</sub> S <sub>1</sub>                                                                                                                                            |      |      |      |      |      |      |      |
|                                                                                                                                                                                                                                                                                                                                                                                                                                                                                                                                                                                                                                                                                                                                                                                                                                                                                                                                                                                                                                                                                                                                                                                                                                                                                                                                                                                                                                                                                                                                                                                                                                                                                                                                                                                                                                                                                                                                                                                                                                                                               |      |      |      |      |      |      |      |
| 1805                                                                                                                                                                                                                                                                                                                                                                                                                                                                                                                                                                                                                                                                                                                                                                                                                                                                                                                                                                                                                                                                                                                                                                                                                                                                                                                                                                                                                                                                                                                                                                                                                                                                                                                                                                                                                                                                                                                                                                                                                                                                          | 1810 | 1815 | 1820 | 1825 | 1830 | 1835 | 1840 |
| S <sub>9</sub> K <sub>9</sub> A <sub>9</sub> M <sub>9</sub> N <sub>9</sub> A <sub>9</sub> I <sub>9</sub> T <sub>9</sub> V <sub>10</sub> Q <sub>9</sub> V <sub>9</sub> N <sub>9</sub> D <sub>9</sub> G <sub>9</sub> E <sub>9</sub> E <sub>9</sub> S <sub>9</sub> I <sub>9</sub> D <sub>9</sub> G <sub>9</sub> N <sub>9</sub> L <sub>9</sub> M <sub>9</sub> M <sub>9</sub> V <sub>9</sub> G <sub>9</sub> S <sub>9</sub> V <sub>13</sub> N <sub>10</sub> S <sub>9</sub> N <sub>13</sub> V <sub>9</sub> Y <sub>9</sub> H <sub>10</sub> N <sub>9</sub> H <sub>9</sub> V <sub>9</sub> M <sub>9</sub> K <sub>11</sub> G <sub>9</sub><br>N <sub>4</sub> T <sub>4</sub> M <sub>4</sub> T <sub>4</sub> V <sub>4</sub> Q <sub>4</sub> V <sub>4</sub> D <sub>4</sub> D <sub>4</sub> G <sub>4</sub> E <sub>4</sub> E <sub>4</sub> M <sub>4</sub> I <sub>4</sub> D <sub>4</sub> G <sub>4</sub> N <sub>4</sub> L <sub>4</sub> M <sub>4</sub> M <sub>4</sub> V <sub>4</sub> G <sub>4</sub> S <sub>4</sub> V <sub>4</sub> N <sub>4</sub> S <sub>4</sub> T <sub>5</sub> S <sub>1</sub> Y <sub>4</sub> H <sub>4</sub> Y <sub>4</sub> H <sub>4</sub> V <sub>4</sub> M <sub>4</sub> K <sub>4</sub> G <sub>4</sub> K <sub>4</sub> S <sub>4</sub> E <sub>3</sub> S <sub>3</sub><br>A <sub>1</sub> M <sub>1</sub> N <sub>1</sub> A <sub>1</sub> I <sub>1</sub> S <sub>2</sub> Q <sub>1</sub> N <sub>1</sub> D <sub>1</sub> G <sub>1</sub> E <sub>1</sub> E <sub>1</sub> L <sub>1</sub> I <sub>1</sub> L <sub>2</sub> G <sub>1</sub> N <sub>1</sub> L <sub>1</sub> M <sub>1</sub> M <sub>1</sub> V <sub>1</sub> G <sub>1</sub> S <sub>1</sub> V <sub>1</sub> N <sub>1</sub> V <sub>1</sub> N <sub>1</sub> V <sub>1</sub> M <sub>1</sub> V <sub>1</sub> M <sub>1</sub> G <sub>1</sub>                                                                                                                                                                                                                                                                                                                   |      |      |      |      |      |      |      |
|                                                                                                                                                                                                                                                                                                                                                                                                                                                                                                                                                                                                                                                                                                                                                                                                                                                                                                                                                                                                                                                                                                                                                                                                                                                                                                                                                                                                                                                                                                                                                                                                                                                                                                                                                                                                                                                                                                                                                                                                                                                                               |      |      |      |      |      |      |      |
| 1845                                                                                                                                                                                                                                                                                                                                                                                                                                                                                                                                                                                                                                                                                                                                                                                                                                                                                                                                                                                                                                                                                                                                                                                                                                                                                                                                                                                                                                                                                                                                                                                                                                                                                                                                                                                                                                                                                                                                                                                                                                                                          | 1850 | 1855 | 1860 | 1865 | 1870 | 1875 | 1880 |
| K <sub>9</sub> S <sub>10</sub> E <sub>9</sub> S <sub>9</sub> F <sub>9</sub> V <sub>9</sub> R <sub>9</sub> Y <sub>9</sub> C <sub>9</sub> E <sub>9</sub> Q <sub>9</sub> F <sub>9</sub> P <sub>9</sub> K <sub>9</sub> S <sub>9</sub> A <sub>9</sub> F <sub>9</sub> T <sub>9</sub> P <sub>9</sub> E <sub>9</sub> L <sub>9</sub> S <sub>9</sub> D <sub>9</sub> Q <sub>9</sub> Y <sub>9</sub> L <sub>13</sub> P <sub>9</sub> S <sub>9</sub> I <sub>9</sub> L <sub>9</sub> S <sub>9</sub> K <sub>9</sub> P <sub>9</sub> A <sub>9</sub> F <sub>9</sub> S <sub>9</sub> K <sub>11</sub> G <sub>9</sub> L <sub>9</sub> L <sub>9</sub><br>F <sub>4</sub> V <sub>4</sub> R <sub>4</sub> Y <sub>4</sub> C <sub>4</sub> E <sub>3</sub> Q <sub>3</sub> F <sub>4</sub> P <sub>4</sub> H <sub>3</sub> S <sub>4</sub> A <sub>4</sub> F <sub>4</sub> V <sub>4</sub> P <sub>4</sub> E <sub>4</sub> L <sub>4</sub> S <sub>4</sub> D <sub>2</sub> K <sub>3</sub> Y <sub>4</sub> L <sub>4</sub> P <sub>4</sub> S <sub>4</sub> I <sub>3</sub> S <sub>4</sub> K <sub>4</sub> P <sub>4</sub> A <sub>4</sub> F <sub>4</sub> R <sub>4</sub> K <sub>4</sub> G <sub>4</sub> L <sub>4</sub> L <sub>4</sub> L <sub>4</sub> Y <sub>4</sub> N <sub>4</sub> E <sub>4</sub><br>E <sub>1</sub> F <sub>1</sub> V <sub>1</sub> R <sub>1</sub> Y <sub>1</sub> C <sub>1</sub> E <sub>1</sub> Q <sub>1</sub> F <sub>1</sub> P <sub>1</sub> K <sub>1</sub> S <sub>1</sub> A <sub>1</sub> F <sub>1</sub> M <sub>1</sub> P <sub>1</sub> E <sub>1</sub> N <sub>2</sub> S <sub>2</sub> D <sub>2</sub> Q <sub>2</sub> G <sub>1</sub> L <sub>1</sub> P <sub>1</sub> I <sub>1</sub> L <sub>1</sub> S <sub>1</sub> K <sub>1</sub> P <sub>1</sub> A <sub>1</sub> F <sub>1</sub> S <sub>1</sub> K <sub>1</sub> G <sub>1</sub> L <sub>1</sub> K <sub>1</sub> Y <sub>1</sub><br>Q <sub>1</sub> N <sub>1</sub> N <sub>1</sub> L <sub>1</sub> Y <sub>1</sub> V <sub>1</sub>                                                                                                                                                             |      |      |      |      |      |      |      |
|                                                                                                                                                                                                                                                                                                                                                                                                                                                                                                                                                                                                                                                                                                                                                                                                                                                                                                                                                                                                                                                                                                                                                                                                                                                                                                                                                                                                                                                                                                                                                                                                                                                                                                                                                                                                                                                                                                                                                                                                                                                                               |      |      |      |      |      |      |      |
| 1885                                                                                                                                                                                                                                                                                                                                                                                                                                                                                                                                                                                                                                                                                                                                                                                                                                                                                                                                                                                                                                                                                                                                                                                                                                                                                                                                                                                                                                                                                                                                                                                                                                                                                                                                                                                                                                                                                                                                                                                                                                                                          | 1890 | 1895 | 1900 | 1905 | 1910 | 1915 | 1920 |
| K <sub>9</sub> Y <sub>9</sub> N <sub>9</sub> E <sub>9</sub> P <sub>9</sub> V <sub>10</sub> R <sub>9</sub> V <sub>9</sub> G <sub>9</sub> L <sub>7</sub> V <sub>9</sub> N <sub>9</sub> F <sub>9</sub> E <sub>9</sub> C <sub>9</sub> L <sub>7</sub> V <sub>9</sub> K <sub>9</sub> A <sub>9</sub> Y <sub>9</sub> L <sub>7</sub> V <sub>9</sub> E <sub>13</sub> K <sub>9</sub> K <sub>9</sub> L <sub>9</sub> E <sub>9</sub> E <sub>9</sub> L <sub>9</sub> G <sub>9</sub> F <sub>9</sub> M <sub>9</sub> G <sub>9</sub> N <sub>9</sub> S <sub>9</sub> G <sub>9</sub> P <sub>13</sub> Q <sub>9</sub> W <sub>9</sub><br>P <sub>4</sub> V <sub>4</sub> K <sub>4</sub> V <sub>4</sub> G <sub>4</sub> F <sub>4</sub> V <sub>4</sub> N <sub>4</sub> Y <sub>4</sub> E <sub>4</sub> C <sub>4</sub> L <sub>4</sub> I <sub>4</sub> K <sub>4</sub> A <sub>4</sub> Y <sub>4</sub> L <sub>4</sub> V <sub>4</sub> I <sub>4</sub> E <sub>4</sub> K <sub>4</sub> K <sub>4</sub> L <sub>4</sub> K <sub>4</sub> E <sub>3</sub> L <sub>4</sub> E <sub>4</sub> F <sub>4</sub> R <sub>2</sub> G <sub>4</sub> N <sub>4</sub> S <sub>4</sub> G <sub>4</sub> P <sub>4</sub> E <sub>4</sub> W <sub>4</sub> D <sub>4</sub> W <sub>4</sub> M <sub>4</sub> E <sub>4</sub><br>N <sub>1</sub> E <sub>1</sub> P <sub>1</sub> R <sub>1</sub> G <sub>1</sub> L <sub>1</sub> V <sub>1</sub> S <sub>2</sub> F <sub>1</sub> E <sub>1</sub> C <sub>1</sub> S <sub>2</sub> V <sub>1</sub> K <sub>1</sub> M <sub>2</sub> S <sub>4</sub> L <sub>1</sub> V <sub>1</sub> S <sub>1</sub> E <sub>1</sub> K <sub>1</sub> D <sub>1</sub> E <sub>1</sub> G <sub>1</sub> L <sub>1</sub> H <sub>1</sub> F <sub>1</sub> E <sub>1</sub> G <sub>1</sub> N <sub>1</sub> S <sub>1</sub> G <sub>1</sub> P <sub>1</sub> Q <sub>1</sub> D <sub>1</sub> P <sub>1</sub><br>N <sub>1</sub> L <sub>1</sub> A <sub>1</sub> Y <sub>1</sub> V <sub>1</sub> L <sub>1</sub> G <sub>1</sub> V <sub>1</sub> C <sub>1</sub>                                                                                                                               |      |      |      |      |      |      |      |

|                                                                                                                                                                                                                                                                                                                                                                                                                                                                                                                                                                                                                                                                                                                                                                                                                                                                                                                                                                                                                                                                                                                                                                                                                                                                                                                                                                                                                                                                                                                                                                                                                                                                                                                                                                                                                                                                                                                                                  |      |      |      |      |      |      |      |
|--------------------------------------------------------------------------------------------------------------------------------------------------------------------------------------------------------------------------------------------------------------------------------------------------------------------------------------------------------------------------------------------------------------------------------------------------------------------------------------------------------------------------------------------------------------------------------------------------------------------------------------------------------------------------------------------------------------------------------------------------------------------------------------------------------------------------------------------------------------------------------------------------------------------------------------------------------------------------------------------------------------------------------------------------------------------------------------------------------------------------------------------------------------------------------------------------------------------------------------------------------------------------------------------------------------------------------------------------------------------------------------------------------------------------------------------------------------------------------------------------------------------------------------------------------------------------------------------------------------------------------------------------------------------------------------------------------------------------------------------------------------------------------------------------------------------------------------------------------------------------------------------------------------------------------------------------|------|------|------|------|------|------|------|
| 1925                                                                                                                                                                                                                                                                                                                                                                                                                                                                                                                                                                                                                                                                                                                                                                                                                                                                                                                                                                                                                                                                                                                                                                                                                                                                                                                                                                                                                                                                                                                                                                                                                                                                                                                                                                                                                                                                                                                                             | 1930 | 1935 | 1940 | 1945 | 1950 | 1955 | 1960 |
| D <sub>9</sub> P <sub>9</sub> M <sub>9</sub> E <sub>9</sub> I <sub>9</sub> L <sub>9</sub> S <sub>9</sub> D <sub>9</sub> L <sub>9</sub> N <sub>9</sub> K <sub>9</sub> K <sub>9</sub> A <sub>13</sub> A <sub>9</sub> M <sub>9</sub> G <sub>9</sub> A <sub>9</sub> L <sub>9</sub> Y <sub>9</sub> Q <sub>9</sub> G <sub>9</sub> S <sub>9</sub> K <sub>9</sub> Q <sub>9</sub> D <sub>9</sub> W <sub>9</sub> L <sub>9</sub> K <sub>9</sub> S <sub>9</sub> M <sub>9</sub> T <sub>9</sub> P <sub>9</sub> E <sub>9</sub> E <sub>9</sub> F <sub>9</sub> I <sub>9</sub> M <sub>9</sub> S <sub>13</sub> V <sub>9</sub> R <sub>9</sub><br>I <sub>9</sub> L <sub>9</sub> S <sub>9</sub> D <sub>9</sub> L <sub>9</sub> N <sub>9</sub> K <sub>9</sub> K <sub>9</sub> A <sub>9</sub> A <sub>9</sub> M <sub>9</sub> G <sub>9</sub> M <sub>9</sub> L <sub>9</sub> Y <sub>9</sub> Q <sub>9</sub> G <sub>9</sub> S <sub>9</sub> K <sub>9</sub> S <sub>9</sub> D <sub>9</sub> W <sub>9</sub> L <sub>9</sub> K <sub>9</sub> S <sub>9</sub> M <sub>9</sub> S <sub>9</sub> P <sub>9</sub> E <sub>9</sub> D <sub>9</sub> F <sub>9</sub> V <sub>9</sub> V <sub>9</sub> S <sub>9</sub> V <sub>9</sub> R <sub>9</sub> V <sub>9</sub> R <sub>9</sub> F <sub>9</sub> K <sub>9</sub><br>M <sub>9</sub> E <sub>9</sub> I <sub>9</sub> L <sub>9</sub> N <sub>9</sub> D <sub>9</sub> N <sub>9</sub> N <sub>9</sub> K <sub>9</sub> K <sub>9</sub> A <sub>9</sub> A <sub>9</sub> G <sub>9</sub> A <sub>9</sub> L <sub>9</sub> Y <sub>9</sub> Q <sub>9</sub> G <sub>9</sub> K <sub>9</sub> Q <sub>9</sub> D <sub>9</sub> W <sub>9</sub> L <sub>9</sub> K <sub>9</sub> M <sub>9</sub> T <sub>9</sub> P <sub>9</sub> E <sub>9</sub> I <sub>9</sub> F <sub>9</sub> I <sub>9</sub> S <sub>9</sub> E <sub>9</sub> E <sub>9</sub> S <sub>9</sub><br>N <sub>9</sub> D <sub>9</sub> L <sub>9</sub>                                                                                             |      |      |      |      |      |      |      |
| 1965                                                                                                                                                                                                                                                                                                                                                                                                                                                                                                                                                                                                                                                                                                                                                                                                                                                                                                                                                                                                                                                                                                                                                                                                                                                                                                                                                                                                                                                                                                                                                                                                                                                                                                                                                                                                                                                                                                                                             | 1970 | 1975 | 1980 | 1985 | 1990 | 1995 | 2000 |
| E <sub>9</sub> S <sub>9</sub> F <sub>9</sub> K <sub>9</sub> H <sub>9</sub> L <sub>9</sub> A <sub>9</sub> G <sub>13</sub> G <sub>9</sub> D <sub>9</sub> V <sub>9</sub> G <sub>13</sub> I <sub>9</sub> W <sub>9</sub> S <sub>10</sub> G <sub>9</sub> S <sub>9</sub> L <sub>13</sub> K <sub>9</sub> A <sub>9</sub> E <sub>9</sub> L <sub>9</sub> R <sub>9</sub> P <sub>9</sub> V <sub>9</sub> E <sub>13</sub> K <sub>9</sub> V <sub>9</sub> S <sub>9</sub> E <sub>9</sub> M <sub>9</sub> K <sub>9</sub> T <sub>13</sub> R <sub>9</sub> V <sub>9</sub> F <sub>9</sub> T <sub>9</sub> G <sub>9</sub> A <sub>9</sub> P <sub>9</sub><br>H <sub>9</sub> L <sub>9</sub> A <sub>9</sub> G <sub>9</sub> D <sub>9</sub> V <sub>9</sub> D <sub>9</sub> I <sub>9</sub> W <sub>9</sub> S <sub>9</sub> W <sub>9</sub> S <sub>9</sub> L <sub>9</sub> K <sub>9</sub> A <sub>9</sub> E <sub>9</sub> A <sub>9</sub> S <sub>9</sub> P <sub>9</sub> C <sub>9</sub> E <sub>9</sub> K <sub>9</sub> V <sub>9</sub> K <sub>9</sub> V <sub>9</sub> M <sub>9</sub> K <sub>9</sub> T <sub>9</sub> S <sub>9</sub> V <sub>9</sub> F <sub>9</sub> V <sub>9</sub> G <sub>9</sub> A <sub>9</sub> P <sub>9</sub> V <sub>9</sub> D <sub>9</sub> V <sub>9</sub> L <sub>9</sub><br>F <sub>9</sub> K <sub>9</sub> H <sub>9</sub> L <sub>9</sub> A <sub>9</sub> G <sub>9</sub> G <sub>9</sub> V <sub>9</sub> G <sub>9</sub> I <sub>9</sub> G <sub>9</sub> L <sub>9</sub> K <sub>9</sub> E <sub>9</sub> L <sub>9</sub> R <sub>9</sub> P <sub>9</sub> V <sub>9</sub> E <sub>9</sub> S <sub>9</sub> D <sub>9</sub> M <sub>9</sub> K <sub>9</sub> T <sub>9</sub> R <sub>9</sub> F <sub>9</sub> T <sub>9</sub> G <sub>9</sub> A <sub>9</sub> P <sub>9</sub> D <sub>9</sub><br>I <sub>9</sub> T <sub>9</sub> Y <sub>9</sub>                                                                                                                                                                    |      |      |      |      |      |      |      |
| 2005                                                                                                                                                                                                                                                                                                                                                                                                                                                                                                                                                                                                                                                                                                                                                                                                                                                                                                                                                                                                                                                                                                                                                                                                                                                                                                                                                                                                                                                                                                                                                                                                                                                                                                                                                                                                                                                                                                                                             | 2010 | 2015 | 2020 | 2025 | 2030 | 2035 | 2040 |
| V <sub>10</sub> D <sub>9</sub> V <sub>9</sub> L <sub>9</sub> L <sub>9</sub> G <sub>9</sub> G <sub>9</sub> K <sub>9</sub> V <sub>10</sub> L <sub>9</sub> V <sub>9</sub> D <sub>9</sub> N <sub>10</sub> F <sub>13</sub> N <sub>9</sub> H <sub>9</sub> H <sub>9</sub> F <sub>9</sub> Y <sub>9</sub> E <sub>9</sub> N <sub>9</sub> H <sub>9</sub> L <sub>9</sub> K <sub>9</sub> G <sub>9</sub> P <sub>9</sub> W <sub>9</sub> T <sub>9</sub> V <sub>9</sub> G <sub>9</sub> M <sub>9</sub> N <sub>9</sub> K <sub>9</sub> F <sub>9</sub> N <sub>10</sub> S <sub>10</sub> G <sub>9</sub> W <sub>9</sub> D <sub>9</sub> S <sub>9</sub><br>L <sub>9</sub> G <sub>9</sub> G <sub>9</sub> K <sub>9</sub> I <sub>9</sub> L <sub>9</sub> V <sub>9</sub> D <sub>9</sub> N <sub>9</sub> F <sub>9</sub> N <sub>9</sub> H <sub>9</sub> H <sub>9</sub> H <sub>9</sub> Y <sub>9</sub> E <sub>9</sub> N <sub>9</sub> H <sub>9</sub> L <sub>9</sub> K <sub>9</sub> G <sub>9</sub> P <sub>9</sub> W <sub>9</sub> T <sub>9</sub> V <sub>9</sub> G <sub>9</sub> I <sub>9</sub> N <sub>9</sub> K <sub>9</sub> F <sub>9</sub> N <sub>9</sub> R <sub>9</sub> G <sub>9</sub> W <sub>9</sub> D <sub>9</sub> K <sub>9</sub> L <sub>9</sub> A <sub>9</sub> S <sub>9</sub> Y <sub>9</sub><br>L <sub>9</sub> L <sub>9</sub> G <sub>9</sub> G <sub>9</sub> K <sub>9</sub> L <sub>9</sub> D <sub>9</sub> F <sub>9</sub> Y <sub>9</sub> H <sub>9</sub> F <sub>9</sub> Y <sub>9</sub> E <sub>9</sub> N <sub>9</sub> H <sub>9</sub> L <sub>9</sub> K <sub>9</sub> G <sub>9</sub> P <sub>9</sub> W <sub>9</sub> T <sub>9</sub> V <sub>9</sub> G <sub>9</sub> M <sub>9</sub> N <sub>9</sub> K <sub>9</sub> F <sub>9</sub> N <sub>9</sub> S <sub>9</sub> G <sub>9</sub> W <sub>9</sub> D <sub>9</sub> S <sub>9</sub> E <sub>9</sub> A <sub>9</sub><br>L <sub>9</sub>                                                                                                                       |      |      |      |      |      |      |      |
| 2045                                                                                                                                                                                                                                                                                                                                                                                                                                                                                                                                                                                                                                                                                                                                                                                                                                                                                                                                                                                                                                                                                                                                                                                                                                                                                                                                                                                                                                                                                                                                                                                                                                                                                                                                                                                                                                                                                                                                             | 2050 | 2055 | 2060 | 2065 | 2070 | 2075 | 2080 |
| L <sub>9</sub> A <sub>9</sub> S <sub>9</sub> Y <sub>9</sub> F <sub>9</sub> N <sub>13</sub> H <sub>9</sub> G <sub>9</sub> W <sub>9</sub> N <sub>9</sub> F <sub>9</sub> I <sub>9</sub> D <sub>10</sub> C <sub>9</sub> D <sub>9</sub> G <sub>9</sub> S <sub>9</sub> R <sub>9</sub> F <sub>9</sub> D <sub>9</sub> T <sub>9</sub> S <sub>9</sub> L <sub>13</sub> A <sub>9</sub> P <sub>9</sub> M <sub>9</sub> L <sub>9</sub> F <sub>9</sub> Q <sub>9</sub> L <sub>9</sub> I <sub>9</sub> C <sub>9</sub> H <sub>9</sub> M <sub>9</sub> S <sub>10</sub> E <sub>9</sub> S <sub>9</sub> F <sub>9</sub> G <sub>9</sub> E <sub>9</sub><br>F <sub>9</sub> D <sub>9</sub> H <sub>9</sub> S <sub>9</sub> W <sub>9</sub> D <sub>9</sub> F <sub>9</sub> I <sub>9</sub> D <sub>9</sub> C <sub>9</sub> D <sub>9</sub> G <sub>9</sub> S <sub>9</sub> R <sub>9</sub> F <sub>9</sub> D <sub>9</sub> T <sub>9</sub> S <sub>9</sub> L <sub>9</sub> A <sub>9</sub> P <sub>9</sub> M <sub>9</sub> P <sub>9</sub> F <sub>9</sub> Q <sub>9</sub> L <sub>9</sub> V <sub>9</sub> C <sub>9</sub> H <sub>9</sub> M <sub>9</sub> S <sub>9</sub> E <sub>9</sub> S <sub>9</sub> F <sub>9</sub> G <sub>9</sub> G <sub>9</sub> F <sub>9</sub> D <sub>9</sub> A <sub>9</sub> M <sub>9</sub><br>S <sub>9</sub> N <sub>9</sub> F <sub>9</sub> N <sub>9</sub> H <sub>9</sub> W <sub>9</sub> N <sub>9</sub> F <sub>9</sub> I <sub>9</sub> C <sub>9</sub> G <sub>9</sub> S <sub>9</sub> R <sub>9</sub> F <sub>9</sub> D <sub>9</sub> T <sub>9</sub> S <sub>9</sub> L <sub>9</sub> A <sub>9</sub> M <sub>9</sub> L <sub>9</sub> F <sub>9</sub> Q <sub>9</sub> L <sub>9</sub> I <sub>9</sub> C <sub>9</sub> V <sub>9</sub> M <sub>9</sub> E <sub>9</sub> F <sub>9</sub> G <sub>9</sub> E <sub>9</sub> F <sub>9</sub> G <sub>9</sub><br>Y <sub>9</sub> M <sub>9</sub> D <sub>9</sub>                                                                                                          |      |      |      |      |      |      |      |
| 2085                                                                                                                                                                                                                                                                                                                                                                                                                                                                                                                                                                                                                                                                                                                                                                                                                                                                                                                                                                                                                                                                                                                                                                                                                                                                                                                                                                                                                                                                                                                                                                                                                                                                                                                                                                                                                                                                                                                                             | 2090 | 2095 | 2100 | 2105 | 2110 | 2115 | 2120 |
| F <sub>9</sub> D <sub>9</sub> N <sub>9</sub> I <sub>9</sub> E <sub>9</sub> T <sub>9</sub> I <sub>9</sub> A <sub>9</sub> L <sub>9</sub> S <sub>9</sub> N <sub>9</sub> L <sub>9</sub> Y <sub>9</sub> T <sub>9</sub> Q <sub>9</sub> I <sub>9</sub> V <sub>9</sub> Y <sub>9</sub> T <sub>13</sub> P <sub>9</sub> I <sub>9</sub> L <sub>9</sub> T <sub>9</sub> I <sub>9</sub> D <sub>9</sub> G <sub>9</sub> Y <sub>9</sub> M <sub>9</sub> T <sub>9</sub> K <sub>9</sub> H <sub>9</sub> S <sub>13</sub> G <sub>13</sub> N <sub>9</sub> N <sub>9</sub> S <sub>13</sub> G <sub>9</sub> Q <sub>9</sub> P <sub>9</sub><br>E <sub>9</sub> T <sub>9</sub> S <sub>9</sub> A <sub>9</sub> L <sub>9</sub> S <sub>9</sub> N <sub>9</sub> L <sub>9</sub> Y <sub>9</sub> T <sub>9</sub> Q <sub>9</sub> I <sub>9</sub> V <sub>9</sub> Y <sub>9</sub> T <sub>9</sub> P <sub>9</sub> I <sub>9</sub> L <sub>9</sub> T <sub>9</sub> I <sub>9</sub> D <sub>9</sub> G <sub>9</sub> Y <sub>9</sub> G <sub>9</sub> T <sub>9</sub> K <sub>9</sub> K <sub>9</sub> H <sub>9</sub> S <sub>9</sub> G <sub>9</sub> N <sub>9</sub> N <sub>9</sub> N <sub>9</sub> N <sub>9</sub> Q <sub>9</sub> P <sub>9</sub> Q <sub>9</sub> T <sub>9</sub> V <sub>9</sub> V <sub>9</sub><br>N <sub>9</sub> I <sub>9</sub> A <sub>9</sub> V <sub>9</sub> I <sub>9</sub> A <sub>9</sub> V <sub>9</sub> S <sub>9</sub> M <sub>9</sub> L <sub>9</sub> Y <sub>9</sub> T <sub>9</sub> Q <sub>9</sub> I <sub>9</sub> V <sub>9</sub> Y <sub>9</sub> T <sub>9</sub> P <sub>9</sub> L <sub>9</sub> T <sub>9</sub> I <sub>9</sub> D <sub>9</sub> F <sub>9</sub> M <sub>9</sub> T <sub>9</sub> K <sub>9</sub> K <sub>9</sub> H <sub>9</sub> S <sub>9</sub> G <sub>9</sub> S <sub>9</sub> G <sub>9</sub> I <sub>9</sub> S <sub>9</sub> G <sub>9</sub> S <sub>9</sub> G <sub>9</sub> I <sub>9</sub> S <sub>9</sub> T <sub>9</sub><br>E <sub>9</sub> T <sub>9</sub> A <sub>9</sub> N <sub>9</sub> L <sub>9</sub> |      |      |      |      |      |      |      |
| 2125                                                                                                                                                                                                                                                                                                                                                                                                                                                                                                                                                                                                                                                                                                                                                                                                                                                                                                                                                                                                                                                                                                                                                                                                                                                                                                                                                                                                                                                                                                                                                                                                                                                                                                                                                                                                                                                                                                                                             | 2130 | 2135 | 2140 | 2145 | 2150 | 2155 | 2160 |
| S <sub>9</sub> T <sub>9</sub> V <sub>9</sub> D <sub>9</sub> N <sub>9</sub> T <sub>9</sub> M <sub>9</sub> I <sub>9</sub> L <sub>9</sub> M <sub>9</sub> I <sub>9</sub> V <sub>9</sub> V <sub>9</sub> E <sub>13</sub> Y <sub>9</sub> C <sub>9</sub> S <sub>9</sub> E <sub>9</sub> V <sub>9</sub> L <sub>9</sub> S <sub>9</sub> Q <sub>9</sub> E <sub>9</sub> G <sub>9</sub> V <sub>9</sub> S <sub>9</sub> M <sub>9</sub> K <sub>10</sub> Y <sub>10</sub> K <sub>9</sub> Y <sub>9</sub> M <sub>9</sub> C <sub>9</sub> N <sub>9</sub> G <sub>9</sub> D <sub>9</sub> D <sub>9</sub> L <sub>10</sub> I <sub>9</sub><br>D <sub>9</sub> N <sub>9</sub> T <sub>9</sub> M <sub>9</sub> I <sub>9</sub> L <sub>9</sub> M <sub>9</sub> I <sub>9</sub> V <sub>9</sub> V <sub>9</sub> E <sub>9</sub> Y <sub>9</sub> C <sub>9</sub> S <sub>9</sub> C <sub>9</sub> V <sub>9</sub> M <sub>9</sub> A <sub>9</sub> H <sub>9</sub> E <sub>9</sub> G <sub>9</sub> I <sub>9</sub> E <sub>9</sub> M <sub>9</sub> K <sub>9</sub> Y <sub>9</sub> K <sub>9</sub> Y <sub>9</sub> M <sub>9</sub> C <sub>9</sub> N <sub>9</sub> G <sub>9</sub> D <sub>9</sub> D <sub>9</sub> L <sub>9</sub> L <sub>9</sub> N <sub>9</sub> A <sub>9</sub> P <sub>9</sub><br>V <sub>9</sub> V <sub>9</sub> D <sub>9</sub> N <sub>9</sub> T <sub>9</sub> M <sub>9</sub> I <sub>9</sub> L <sub>9</sub> M <sub>9</sub> I <sub>9</sub> V <sub>9</sub> V <sub>9</sub> E <sub>9</sub> Y <sub>9</sub> S <sub>9</sub> E <sub>9</sub> V <sub>9</sub> L <sub>9</sub> S <sub>9</sub> Q <sub>9</sub> L <sub>9</sub> G <sub>9</sub> V <sub>9</sub> S <sub>9</sub> F <sub>9</sub> S <sub>9</sub> C <sub>9</sub> N <sub>9</sub> G <sub>9</sub> D <sub>9</sub> D <sub>9</sub> I <sub>9</sub> V <sub>9</sub> N <sub>9</sub><br>E <sub>9</sub> I <sub>9</sub> M <sub>9</sub><br>V <sub>9</sub> M <sub>9</sub>                                                                                                       |      |      |      |      |      |      |      |
| 2165                                                                                                                                                                                                                                                                                                                                                                                                                                                                                                                                                                                                                                                                                                                                                                                                                                                                                                                                                                                                                                                                                                                                                                                                                                                                                                                                                                                                                                                                                                                                                                                                                                                                                                                                                                                                                                                                                                                                             | 2170 | 2175 | 2180 | 2185 | 2190 | 2195 | 2200 |
| L <sub>9</sub> N <sub>9</sub> A <sub>9</sub> P <sub>9</sub> D <sub>9</sub> D <sub>9</sub> E <sub>9</sub> I <sub>9</sub> P <sub>9</sub> I <sub>9</sub> I <sub>9</sub> Q <sub>9</sub> S <sub>10</sub> R <sub>9</sub> F <sub>13</sub> K <sub>9</sub> D <sub>9</sub> L <sub>9</sub> F <sub>9</sub> A <sub>9</sub> E <sub>9</sub> C <sub>9</sub> G <sub>9</sub> L <sub>9</sub> N <sub>9</sub> Y <sub>9</sub> D <sub>10</sub> F <sub>9</sub> D <sub>9</sub> D <sub>9</sub> V <sub>9</sub> H <sub>9</sub> K <sub>9</sub> S <sub>9</sub> I <sub>9</sub> E <sub>9</sub> T <sub>9</sub> I <sub>9</sub> E <sub>9</sub> Y <sub>9</sub><br>D <sub>9</sub> E <sub>9</sub> E <sub>9</sub> I <sub>9</sub> P <sub>9</sub> M <sub>9</sub> I <sub>9</sub> Q <sub>9</sub> S <sub>9</sub> R <sub>9</sub> F <sub>9</sub> K <sub>9</sub> N <sub>9</sub> L <sub>9</sub> D <sub>9</sub> A <sub>9</sub> E <sub>9</sub> C <sub>9</sub> G <sub>9</sub> L <sub>9</sub> N <sub>9</sub> Y <sub>9</sub> D <sub>9</sub> F <sub>9</sub> D <sub>9</sub> D <sub>9</sub> V <sub>9</sub> H <sub>9</sub> K <sub>9</sub> E <sub>9</sub> M <sub>9</sub> D <sub>9</sub> T <sub>9</sub> M <sub>9</sub> E <sub>9</sub> Y <sub>9</sub> M <sub>9</sub> S <sub>9</sub> H <sub>9</sub> S <sub>9</sub><br>A <sub>9</sub> P <sub>9</sub> D <sub>9</sub> V <sub>9</sub> E <sub>9</sub> I <sub>9</sub> P <sub>9</sub> I <sub>9</sub> Q <sub>9</sub> S <sub>9</sub> R <sub>9</sub> F <sub>9</sub> K <sub>9</sub> L <sub>9</sub> S <sub>9</sub> A <sub>9</sub> E <sub>9</sub> C <sub>9</sub> G <sub>9</sub> L <sub>9</sub> N <sub>9</sub> Y <sub>9</sub> F <sub>9</sub> D <sub>9</sub> V <sub>9</sub> H <sub>9</sub> K <sub>9</sub> S <sub>9</sub> I <sub>9</sub> E <sub>9</sub> T <sub>9</sub> M <sub>9</sub> E <sub>9</sub> Y <sub>9</sub> M <sub>9</sub><br>D <sub>9</sub> F <sub>9</sub> K <sub>9</sub> S <sub>9</sub>                                                                             |      |      |      |      |      |      |      |
| 2205                                                                                                                                                                                                                                                                                                                                                                                                                                                                                                                                                                                                                                                                                                                                                                                                                                                                                                                                                                                                                                                                                                                                                                                                                                                                                                                                                                                                                                                                                                                                                                                                                                                                                                                                                                                                                                                                                                                                             | 2210 | 2215 | 2220 | 2225 | 2230 | 2235 | 2240 |
| M <sub>9</sub> S <sub>10</sub> H <sub>9</sub> S <sub>13</sub> F <sub>9</sub> A <sub>9</sub> Q <sub>9</sub> R <sub>9</sub> D <sub>9</sub> G <sub>9</sub> F <sub>9</sub> F <sub>9</sub> I <sub>9</sub> P <sub>9</sub> K <sub>10</sub> L <sub>9</sub> K <sub>9</sub> K <sub>9</sub> E <sub>9</sub> S <sub>9</sub> I <sub>9</sub> M <sub>9</sub> A <sub>9</sub> I <sub>9</sub> L <sub>9</sub> E <sub>10</sub> W <sub>9</sub> E <sub>13</sub> R <sub>9</sub> G <sub>9</sub> D <sub>9</sub> E <sub>9</sub> V <sub>9</sub> M <sub>9</sub> S <sub>10</sub> T <sub>9</sub> R <sub>9</sub> S <sub>9</sub> A <sub>13</sub> L <sub>9</sub><br>F <sub>9</sub> A <sub>9</sub> R <sub>9</sub> K <sub>9</sub> D <sub>9</sub> G <sub>9</sub> F <sub>9</sub> F <sub>9</sub> I <sub>9</sub> P <sub>9</sub> K <sub>9</sub> L <sub>9</sub> K <sub>9</sub> K <sub>9</sub> E <sub>9</sub> S <sub>9</sub> M <sub>9</sub> V <sub>9</sub> A <sub>9</sub> M <sub>9</sub> L <sub>9</sub> E <sub>9</sub> W <sub>9</sub> E <sub>9</sub> S <sub>9</sub> G <sub>9</sub> D <sub>9</sub> G <sub>9</sub> I <sub>9</sub> M <sub>9</sub> S <sub>9</sub> T <sub>9</sub> S <sub>9</sub> S <sub>9</sub> A <sub>9</sub> L <sub>9</sub> S <sub>9</sub> A <sub>9</sub> N <sub>9</sub> Y <sub>9</sub><br>H <sub>9</sub> F <sub>9</sub> A <sub>9</sub> Q <sub>9</sub> R <sub>9</sub> D <sub>9</sub> G <sub>9</sub> G <sub>9</sub> Y <sub>9</sub> I <sub>9</sub> Y <sub>9</sub> L <sub>9</sub> K <sub>9</sub> E <sub>9</sub> S <sub>9</sub> I <sub>9</sub> I <sub>9</sub> M <sub>9</sub> V <sub>9</sub> L <sub>9</sub> M <sub>9</sub> W <sub>9</sub> S <sub>9</sub> V <sub>9</sub> E <sub>9</sub> V <sub>9</sub> M <sub>9</sub> I <sub>9</sub> T <sub>9</sub> S <sub>9</sub> N <sub>9</sub> L <sub>9</sub> A <sub>9</sub><br>Q <sub>9</sub> F <sub>9</sub> P <sub>9</sub> D <sub>9</sub> V <sub>9</sub> A <sub>9</sub><br>S <sub>9</sub> D <sub>9</sub>                                        |      |      |      |      |      |      |      |
| 2245                                                                                                                                                                                                                                                                                                                                                                                                                                                                                                                                                                                                                                                                                                                                                                                                                                                                                                                                                                                                                                                                                                                                                                                                                                                                                                                                                                                                                                                                                                                                                                                                                                                                                                                                                                                                                                                                                                                                             | 2250 | 2255 | 2260 | 2265 | 2270 | 2275 | 2280 |
| N <sub>9</sub> A <sub>9</sub> A <sub>9</sub> Y <sub>9</sub> I <sub>9</sub> E <sub>9</sub> S <sub>9</sub> F <sub>9</sub> G <sub>9</sub> Y <sub>9</sub> D <sub>9</sub> D <sub>9</sub> L <sub>9</sub> M <sub>9</sub> M <sub>9</sub> E <sub>10</sub> I <sub>9</sub> E <sub>9</sub> R <sub>9</sub> F <sub>9</sub> A <sub>13</sub> V <sub>9</sub> F <sub>9</sub> W <sub>9</sub> A <sub>9</sub> S <sub>9</sub> E <sub>11</sub> K <sub>9</sub> G <sub>9</sub> C <sub>9</sub> E <sub>9</sub> Y <sub>9</sub> P <sub>9</sub> L <sub>9</sub> L <sub>9</sub> D <sub>9</sub> S <sub>9</sub> K <sub>9</sub> R <sub>9</sub> V <sub>9</sub><br>I <sub>9</sub> E <sub>9</sub> S <sub>9</sub> F <sub>9</sub> G <sub>9</sub> Y <sub>9</sub> D <sub>9</sub> D <sub>9</sub> L <sub>9</sub> M <sub>9</sub> T <sub>9</sub> E <sub>9</sub> I <sub>9</sub> E <sub>9</sub> S <sub>9</sub> F <sub>9</sub> A <sub>9</sub> V <sub>9</sub> F <sub>9</sub> W <sub>9</sub> F <sub>9</sub> S <sub>9</sub> E <sub>9</sub> K <sub>9</sub> G <sub>9</sub> C <sub>9</sub> G <sub>9</sub> Y <sub>9</sub> P <sub>9</sub> L <sub>9</sub> L <sub>9</sub> D <sub>9</sub> S <sub>9</sub> K <sub>9</sub> R <sub>9</sub> V <sub>9</sub> E <sub>9</sub> G <sub>9</sub> L <sub>9</sub> Y <sub>9</sub><br>A <sub>9</sub> Y <sub>9</sub> I <sub>9</sub> E <sub>9</sub> S <sub>9</sub> F <sub>9</sub> G <sub>9</sub> Y <sub>9</sub> D <sub>9</sub> D <sub>9</sub> A <sub>9</sub> M <sub>9</sub> T <sub>9</sub> I <sub>9</sub> Y <sub>9</sub> S <sub>9</sub> Y <sub>9</sub> S <sub>9</sub> Y <sub>9</sub> W <sub>9</sub> A <sub>9</sub> S <sub>9</sub> E <sub>9</sub> K <sub>9</sub> S <sub>9</sub> C <sub>9</sub> E <sub>9</sub> Y <sub>9</sub> P <sub>9</sub> L <sub>9</sub> L <sub>9</sub> D <sub>9</sub> M <sub>9</sub> K <sub>9</sub> R <sub>9</sub> V <sub>9</sub> E <sub>9</sub> G <sub>9</sub><br>L <sub>9</sub> V <sub>9</sub> S <sub>9</sub>                                               |      |      |      |      |      |      |      |

|                                                                                                                                                                                                                                                                                                                                                                                                                                                                                                                                                                                                                                                                                                                                                                                                                                                                                                                                                                                                                                                                                                                                                                                                                                                                                                                                                                                                                                                                                                                                                                                                                                                                                                                                                                                                                                                                                                                                                                                                                                                                                                                                                                                                                                          |      |      |      |      |      |      |      |
|------------------------------------------------------------------------------------------------------------------------------------------------------------------------------------------------------------------------------------------------------------------------------------------------------------------------------------------------------------------------------------------------------------------------------------------------------------------------------------------------------------------------------------------------------------------------------------------------------------------------------------------------------------------------------------------------------------------------------------------------------------------------------------------------------------------------------------------------------------------------------------------------------------------------------------------------------------------------------------------------------------------------------------------------------------------------------------------------------------------------------------------------------------------------------------------------------------------------------------------------------------------------------------------------------------------------------------------------------------------------------------------------------------------------------------------------------------------------------------------------------------------------------------------------------------------------------------------------------------------------------------------------------------------------------------------------------------------------------------------------------------------------------------------------------------------------------------------------------------------------------------------------------------------------------------------------------------------------------------------------------------------------------------------------------------------------------------------------------------------------------------------------------------------------------------------------------------------------------------------|------|------|------|------|------|------|------|
| 2285                                                                                                                                                                                                                                                                                                                                                                                                                                                                                                                                                                                                                                                                                                                                                                                                                                                                                                                                                                                                                                                                                                                                                                                                                                                                                                                                                                                                                                                                                                                                                                                                                                                                                                                                                                                                                                                                                                                                                                                                                                                                                                                                                                                                                                     | 2290 | 2295 | 2300 | 2305 | 2310 | 2315 | 2320 |
| E <sub>9</sub> G <sub>9</sub> L <sub>9</sub> Y <sub>11</sub> L <sub>9</sub> D <sub>13</sub> E <sub>9</sub> F <sub>6</sub> T <sub>5</sub> E <sub>11</sub> I <sub>7</sub> N <sub>9</sub> E <sub>9</sub> E <sub>9</sub> W <sub>9</sub> L <sub>13</sub> S <sub>9</sub> G <sub>9</sub> I <sub>7</sub> L <sub>9</sub> P <sub>9</sub> P <sub>9</sub> S <sub>9</sub> F <sub>9</sub> E <sub>9</sub> D <sub>7</sub> C <sub>9</sub> Y <sub>9</sub> I <sub>7</sub> D <sub>9</sub> L <sub>9</sub> Q <sub>9</sub> V <sub>9</sub> V <sub>9</sub> D <sub>9</sub> S <sub>12</sub> P <sub>9</sub> Q <sub>9</sub> S <sub>7</sub> L <sub>7</sub><br>L <sub>9</sub> D <sub>4</sub> E <sub>4</sub> H <sub>2</sub> T <sub>4</sub> Y <sub>1</sub> I <sub>7</sub> N <sub>9</sub> E <sub>4</sub> D <sub>2</sub> W <sub>4</sub> L <sub>4</sub> S <sub>4</sub> G <sub>4</sub> I <sub>4</sub> G <sub>4</sub> P <sub>4</sub> P <sub>4</sub> S <sub>4</sub> F <sub>4</sub> E <sub>4</sub> N <sub>4</sub> C <sub>4</sub> Y <sub>4</sub> I <sub>7</sub> N <sub>4</sub> L <sub>4</sub> Q <sub>4</sub> V <sub>4</sub> V <sub>4</sub> D <sub>4</sub> S <sub>4</sub> P <sub>4</sub> Q <sub>4</sub> S <sub>4</sub> N <sub>4</sub> S <sub>4</sub> V <sub>3</sub> A <sub>3</sub> K <sub>4</sub><br>Y <sub>1</sub> F <sub>1</sub> D <sub>1</sub> E <sub>1</sub> T <sub>1</sub> Y <sub>2</sub> I <sub>1</sub> N <sub>1</sub> V <sub>2</sub> E <sub>1</sub> W <sub>1</sub> L <sub>1</sub> S <sub>1</sub> I <sub>1</sub> L <sub>1</sub> P <sub>1</sub> P <sub>1</sub> S <sub>1</sub> F <sub>1</sub> E <sub>1</sub> N <sub>1</sub> C <sub>1</sub> Y <sub>1</sub> I <sub>1</sub> D <sub>1</sub> L <sub>1</sub> M <sub>1</sub> V <sub>1</sub> K <sub>1</sub> D <sub>1</sub> S <sub>1</sub> P <sub>1</sub> Q <sub>1</sub> K <sub>1</sub> S <sub>1</sub> T <sub>2</sub> S <sub>2</sub><br>D <sub>1</sub> E <sub>1</sub> M <sub>1</sub> Q <sub>1</sub> V <sub>1</sub> R <sub>1</sub> N <sub>1</sub> M <sub>1</sub> L <sub>1</sub> V <sub>1</sub><br>V <sub>1</sub> N <sub>1</sub>                                                                                                                                                                                                          |      |      |      |      |      |      |      |
| 2325                                                                                                                                                                                                                                                                                                                                                                                                                                                                                                                                                                                                                                                                                                                                                                                                                                                                                                                                                                                                                                                                                                                                                                                                                                                                                                                                                                                                                                                                                                                                                                                                                                                                                                                                                                                                                                                                                                                                                                                                                                                                                                                                                                                                                                     | 2330 | 2335 | 2340 | 2345 | 2350 | 2355 | 2360 |
| N <sub>9</sub> V <sub>4</sub> A <sub>7</sub> K <sub>9</sub> S <sub>9</sub> E <sub>9</sub> E <sub>7</sub> E <sub>9</sub> V <sub>9</sub> T <sub>9</sub> S <sub>9</sub> K <sub>9</sub> F <sub>9</sub> R <sub>9</sub> M <sub>9</sub> G <sub>9</sub> I <sub>13</sub> E <sub>9</sub> A <sub>9</sub> P <sub>9</sub> M <sub>9</sub> T <sub>9</sub> F <sub>9</sub> V <sub>9</sub> T <sub>9</sub> G <sub>9</sub> N <sub>9</sub> A <sub>9</sub> Q <sub>9</sub> K <sub>10</sub> L <sub>9</sub> K <sub>9</sub> E <sub>9</sub> V <sub>9</sub> K <sub>9</sub> Q <sub>9</sub> I <sub>9</sub> F <sub>9</sub> G <sub>9</sub> P <sub>9</sub><br>S <sub>4</sub> E <sub>4</sub> E <sub>4</sub> E <sub>4</sub> V <sub>4</sub> T <sub>4</sub> S <sub>4</sub> K <sub>4</sub> I <sub>4</sub> R <sub>4</sub> M <sub>4</sub> G <sub>4</sub> I <sub>4</sub> E <sub>4</sub> A <sub>4</sub> P <sub>4</sub> A <sub>4</sub> T <sub>4</sub> F <sub>4</sub> V <sub>4</sub> T <sub>4</sub> G <sub>4</sub> N <sub>4</sub> A <sub>4</sub> Q <sub>4</sub> K <sub>4</sub> L <sub>4</sub> K <sub>4</sub> E <sub>4</sub> V <sub>4</sub> K <sub>4</sub> Q <sub>4</sub> I <sub>4</sub> F <sub>4</sub> G <sub>4</sub> P <sub>4</sub> T <sub>4</sub> I <sub>4</sub> P <sub>4</sub> I <sub>4</sub><br>A <sub>1</sub> K <sub>1</sub> V <sub>2</sub> S <sub>1</sub> E <sub>1</sub> G <sub>1</sub> K <sub>2</sub> T <sub>1</sub> S <sub>1</sub> K <sub>1</sub> I <sub>1</sub> E <sub>1</sub> V <sub>1</sub> G <sub>1</sub> I <sub>1</sub> E <sub>1</sub> P <sub>1</sub> I <sub>1</sub> T <sub>1</sub> I <sub>2</sub> V <sub>1</sub> T <sub>1</sub> G <sub>1</sub> N <sub>1</sub> A <sub>1</sub> Q <sub>1</sub> H <sub>1</sub> E <sub>1</sub> V <sub>1</sub> M <sub>2</sub> Q <sub>1</sub> I <sub>1</sub> F <sub>1</sub> G <sub>1</sub> P <sub>1</sub> T <sub>1</sub><br>A <sub>1</sub> S <sub>1</sub> V <sub>1</sub> S <sub>1</sub> V <sub>1</sub> R <sub>1</sub> M <sub>1</sub> A <sub>1</sub> T <sub>1</sub> F <sub>1</sub> L <sub>1</sub> K <sub>1</sub>                                                                                                                                                                                                                               |      |      |      |      |      |      |      |
| 2365                                                                                                                                                                                                                                                                                                                                                                                                                                                                                                                                                                                                                                                                                                                                                                                                                                                                                                                                                                                                                                                                                                                                                                                                                                                                                                                                                                                                                                                                                                                                                                                                                                                                                                                                                                                                                                                                                                                                                                                                                                                                                                                                                                                                                                     | 2370 | 2375 | 2380 | 2385 | 2390 | 2395 | 2400 |
| T <sub>9</sub> I <sub>13</sub> P <sub>9</sub> I <sub>9</sub> V <sub>10</sub> S <sub>9</sub> R <sub>9</sub> K <sub>9</sub> V <sub>9</sub> D <sub>9</sub> L <sub>9</sub> P <sub>10</sub> E <sub>9</sub> S <sub>9</sub> Q <sub>9</sub> G <sub>9</sub> T <sub>9</sub> I <sub>9</sub> E <sub>9</sub> E <sub>13</sub> L <sub>9</sub> I <sub>9</sub> K <sub>10</sub> E <sub>9</sub> K <sub>9</sub> A <sub>11</sub> R <sub>9</sub> V <sub>9</sub> A <sub>9</sub> A <sub>9</sub> E <sub>9</sub> L <sub>7</sub> V <sub>13</sub> G <sub>9</sub> G <sub>9</sub> P <sub>9</sub> V <sub>10</sub> L <sub>9</sub> V <sub>9</sub> E <sub>9</sub><br>V <sub>3</sub> S <sub>4</sub> R <sub>4</sub> K <sub>4</sub> I <sub>4</sub> D <sub>4</sub> L <sub>4</sub> P <sub>4</sub> E <sub>4</sub> P <sub>4</sub> Q <sub>4</sub> G <sub>4</sub> T <sub>4</sub> V <sub>4</sub> E <sub>4</sub> E <sub>4</sub> I <sub>4</sub> V <sub>4</sub> K <sub>4</sub> I <sub>4</sub> K <sub>4</sub> A <sub>3</sub> R <sub>4</sub> V <sub>4</sub> A <sub>4</sub> S <sub>2</sub> E <sub>4</sub> L <sub>3</sub> V <sub>3</sub> G <sub>4</sub> G <sub>4</sub> P <sub>4</sub> G <sub>1</sub> L <sub>4</sub> V <sub>5</sub> E <sub>4</sub> D <sub>4</sub> T <sub>4</sub> S <sub>4</sub> L <sub>4</sub><br>I <sub>1</sub> Q <sub>1</sub> S <sub>1</sub> R <sub>1</sub> K <sub>1</sub> V <sub>1</sub> D <sub>1</sub> I <sub>1</sub> E <sub>1</sub> Q <sub>1</sub> P <sub>2</sub> T <sub>1</sub> D <sub>1</sub> E <sub>1</sub> E <sub>1</sub> I <sub>1</sub> E <sub>1</sub> A <sub>1</sub> R <sub>1</sub> V <sub>1</sub> A <sub>1</sub> F <sub>1</sub> I <sub>1</sub> L <sub>1</sub> K <sub>1</sub> I <sub>1</sub> P <sub>1</sub> L <sub>1</sub> E <sub>1</sub> D <sub>1</sub> T <sub>1</sub><br>P <sub>1</sub> V <sub>1</sub> Q <sub>1</sub> F <sub>1</sub> G <sub>1</sub> A <sub>1</sub> V <sub>1</sub> A <sub>1</sub> E <sub>1</sub> V <sub>1</sub> G <sub>1</sub>                                                                                                                                                                                                                                                                                                                   |      |      |      |      |      |      |      |
| 2405                                                                                                                                                                                                                                                                                                                                                                                                                                                                                                                                                                                                                                                                                                                                                                                                                                                                                                                                                                                                                                                                                                                                                                                                                                                                                                                                                                                                                                                                                                                                                                                                                                                                                                                                                                                                                                                                                                                                                                                                                                                                                                                                                                                                                                     | 2410 | 2415 | 2420 | 2425 | 2430 | 2435 | 2440 |
| D <sub>9</sub> T <sub>9</sub> S <sub>9</sub> L <sub>9</sub> C <sub>9</sub> F <sub>9</sub> D <sub>9</sub> A <sub>9</sub> L <sub>9</sub> N <sub>9</sub> G <sub>9</sub> L <sub>9</sub> P <sub>10</sub> G <sub>9</sub> P <sub>9</sub> Y <sub>9</sub> I <sub>9</sub> K <sub>9</sub> W <sub>9</sub> F <sub>9</sub> L <sub>7</sub> E <sub>9</sub> G <sub>10</sub> I <sub>9</sub> G <sub>9</sub> L <sub>9</sub> E <sub>9</sub> G <sub>9</sub> L <sub>8</sub> Y <sub>9</sub> K <sub>9</sub> L <sub>9</sub> V <sub>9</sub> E <sub>9</sub> P <sub>9</sub> Y <sub>9</sub> Q <sub>9</sub> N <sub>9</sub> S <sub>7</sub> M <sub>9</sub><br>C <sub>4</sub> F <sub>4</sub> D <sub>4</sub> A <sub>4</sub> L <sub>4</sub> N <sub>4</sub> G <sub>4</sub> L <sub>4</sub> P <sub>4</sub> G <sub>4</sub> P <sub>4</sub> Y <sub>4</sub> I <sub>4</sub> K <sub>4</sub> W <sub>4</sub> F <sub>4</sub> M <sub>4</sub> E <sub>4</sub> G <sub>4</sub> I <sub>4</sub> G <sub>4</sub> L <sub>4</sub> E <sub>4</sub> G <sub>4</sub> L <sub>4</sub> Y <sub>4</sub> K <sub>4</sub> L <sub>4</sub> V <sub>4</sub> E <sub>4</sub> P <sub>4</sub> Y <sub>4</sub> Q <sub>4</sub> N <sub>4</sub> K <sub>4</sub> M <sub>4</sub> A <sub>4</sub> S <sub>4</sub> A <sub>4</sub> L <sub>4</sub><br>S <sub>1</sub> L <sub>1</sub> C <sub>1</sub> F <sub>1</sub> D <sub>1</sub> A <sub>1</sub> L <sub>1</sub> N <sub>1</sub> G <sub>1</sub> L <sub>1</sub> G <sub>1</sub> Y <sub>1</sub> I <sub>1</sub> K <sub>1</sub> W <sub>1</sub> F <sub>1</sub> L <sub>1</sub> E <sub>1</sub> M <sub>2</sub> I <sub>1</sub> L <sub>1</sub> E <sub>1</sub> G <sub>1</sub> L <sub>1</sub> Y <sub>1</sub> K <sub>1</sub> L <sub>1</sub> V <sub>1</sub> E <sub>1</sub> P <sub>1</sub> Y <sub>1</sub> Q <sub>1</sub> N <sub>1</sub> K <sub>1</sub> M <sub>1</sub> K <sub>2</sub> S <sub>1</sub><br>V <sub>1</sub>                                                                                                                                                                                                                                                                                                                                                                                     |      |      |      |      |      |      |      |
| 2445                                                                                                                                                                                                                                                                                                                                                                                                                                                                                                                                                                                                                                                                                                                                                                                                                                                                                                                                                                                                                                                                                                                                                                                                                                                                                                                                                                                                                                                                                                                                                                                                                                                                                                                                                                                                                                                                                                                                                                                                                                                                                                                                                                                                                                     | 2450 | 2455 | 2460 | 2465 | 2470 | 2475 | 2480 |
| A <sub>10</sub> S <sub>9</sub> A <sub>9</sub> L <sub>9</sub> C <sub>9</sub> V <sub>13</sub> F <sub>10</sub> A <sub>9</sub> F <sub>9</sub> V <sub>9</sub> N <sub>9</sub> K <sub>9</sub> V <sub>9</sub> G <sub>9</sub> D <sub>9</sub> P <sub>9</sub> M <sub>9</sub> I <sub>9</sub> F <sub>9</sub> K <sub>9</sub> G <sub>13</sub> V <sub>9</sub> L <sub>9</sub> S <sub>9</sub> G <sub>9</sub> E <sub>9</sub> I <sub>7</sub> V <sub>9</sub> M <sub>9</sub> P <sub>9</sub> R <sub>9</sub> G <sub>9</sub> P <sub>9</sub> N <sub>9</sub> S <sub>9</sub> F <sub>9</sub> G <sub>9</sub> W <sub>9</sub> D <sub>9</sub><br>C <sub>4</sub> V <sub>4</sub> F <sub>4</sub> A <sub>4</sub> F <sub>4</sub> A <sub>4</sub> N <sub>4</sub> K <sub>4</sub> V <sub>4</sub> G <sub>4</sub> D <sub>4</sub> D <sub>4</sub> P <sub>4</sub> M <sub>4</sub> I <sub>4</sub> F <sub>4</sub> K <sub>4</sub> G <sub>4</sub> V <sub>4</sub> L <sub>4</sub> S <sub>4</sub> L <sub>4</sub> E <sub>4</sub> I <sub>4</sub> V <sub>4</sub> M <sub>4</sub> P <sub>4</sub> R <sub>4</sub> G <sub>4</sub> P <sub>4</sub> K <sub>4</sub> S <sub>4</sub> F <sub>4</sub> G <sub>4</sub> W <sub>4</sub> D <sub>4</sub> P <sub>4</sub> I <sub>4</sub> F <sub>4</sub> Q <sub>4</sub><br>L <sub>1</sub> C <sub>1</sub> V <sub>1</sub> V <sub>1</sub> N <sub>1</sub> K <sub>1</sub> V <sub>1</sub> G <sub>1</sub> D <sub>1</sub> D <sub>1</sub> P <sub>1</sub> M <sub>1</sub> I <sub>1</sub> F <sub>1</sub> K <sub>1</sub> G <sub>1</sub> V <sub>1</sub> S <sub>1</sub> G <sub>1</sub> K <sub>1</sub> L <sub>1</sub> V <sub>1</sub> M <sub>1</sub> P <sub>1</sub> R <sub>1</sub> G <sub>1</sub> L <sub>1</sub> N <sub>1</sub> S <sub>4</sub> S <sub>4</sub> G <sub>1</sub> W <sub>1</sub> D <sub>1</sub> P <sub>1</sub> I <sub>1</sub><br>L <sub>1</sub> S <sub>1</sub> E <sub>1</sub> S <sub>1</sub> P <sub>1</sub> F <sub>1</sub> L <sub>1</sub><br>N <sub>1</sub>                                                                                                                                                                                                                                                                                                                    |      |      |      |      |      |      |      |
| 2485                                                                                                                                                                                                                                                                                                                                                                                                                                                                                                                                                                                                                                                                                                                                                                                                                                                                                                                                                                                                                                                                                                                                                                                                                                                                                                                                                                                                                                                                                                                                                                                                                                                                                                                                                                                                                                                                                                                                                                                                                                                                                                                                                                                                                                     | 2490 | 2495 | 2500 | 2505 | 2510 | 2515 | 2520 |
| P <sub>12</sub> I <sub>9</sub> F <sub>9</sub> Q <sub>9</sub> P <sub>9</sub> L <sub>9</sub> N <sub>9</sub> W <sub>9</sub> K <sub>9</sub> S <sub>6</sub> T <sub>9</sub> F <sub>9</sub> A <sub>12</sub> E <sub>13</sub> M <sub>9</sub> M <sub>9</sub> T <sub>9</sub> E <sub>9</sub> E <sub>9</sub> K <sub>9</sub> N <sub>9</sub> M <sub>9</sub> M <sub>9</sub> S <sub>9</sub> H <sub>9</sub> R <sub>10</sub> F <sub>9</sub> R <sub>9</sub> A <sub>9</sub> L <sub>10</sub> S <sub>9</sub> L <sub>9</sub> V <sub>9</sub> S <sub>9</sub> D <sub>12</sub> F <sub>9</sub> L <sub>9</sub> K <sub>9</sub> S <sub>9</sub> S <sub>11</sub><br>F <sub>1</sub> L <sub>4</sub> N <sub>4</sub> W <sub>4</sub> S <sub>4</sub> S <sub>4</sub> D <sub>4</sub> F <sub>4</sub> A <sub>4</sub> E <sub>4</sub> M <sub>4</sub> M <sub>4</sub> M <sub>4</sub> M <sub>4</sub> E <sub>4</sub> K <sub>4</sub> N <sub>4</sub> M <sub>4</sub> M <sub>4</sub> S <sub>4</sub> H <sub>4</sub> R <sub>4</sub> F <sub>4</sub> R <sub>4</sub> A <sub>4</sub> L <sub>4</sub> S <sub>4</sub> L <sub>5</sub> V <sub>4</sub> S <sub>4</sub> D <sub>4</sub> F <sub>4</sub> L <sub>4</sub> K <sub>4</sub> L <sub>4</sub> S <sub>4</sub> S <sub>4</sub> Y <sub>4</sub> F <sub>4</sub> H <sub>4</sub><br>S <sub>1</sub> Q <sub>1</sub> P <sub>1</sub> L <sub>1</sub> G <sub>1</sub> K <sub>1</sub> T <sub>4</sub> S <sub>1</sub> S <sub>2</sub> K <sub>1</sub> A <sub>1</sub> E <sub>1</sub> T <sub>1</sub> A <sub>1</sub> E <sub>1</sub> A <sub>2</sub> K <sub>1</sub> N <sub>1</sub> M <sub>1</sub> M <sub>1</sub> T <sub>1</sub> H <sub>1</sub> F <sub>1</sub> A <sub>1</sub> S <sub>1</sub> V <sub>1</sub> S <sub>1</sub> D <sub>1</sub> F <sub>1</sub> S <sub>1</sub> N <sub>1</sub> S <sub>1</sub> D <sub>2</sub> T <sub>1</sub><br>M <sub>1</sub> N <sub>1</sub> W <sub>1</sub> K <sub>1</sub> T <sub>1</sub> F <sub>1</sub> E <sub>1</sub> S <sub>1</sub> Y <sub>1</sub>                                                                                                                                                                                                                                                                                                     |      |      |      |      |      |      |      |
| 2525                                                                                                                                                                                                                                                                                                                                                                                                                                                                                                                                                                                                                                                                                                                                                                                                                                                                                                                                                                                                                                                                                                                                                                                                                                                                                                                                                                                                                                                                                                                                                                                                                                                                                                                                                                                                                                                                                                                                                                                                                                                                                                                                                                                                                                     | 2530 | 2535 | 2540 | 2545 | 2550 | 2555 | 2560 |
| S <sub>9</sub> Y <sub>9</sub> F <sub>10</sub> S <sub>9</sub> F <sub>9</sub> A <sub>9</sub> K <sub>9</sub> G <sub>9</sub> L <sub>10</sub> D <sub>10</sub> R <sub>9</sub> D <sub>11</sub> I <sub>9</sub> F <sub>9</sub> I <sub>9</sub> D <sub>9</sub> V <sub>9</sub> Q <sub>9</sub> A <sub>9</sub> I <sub>9</sub> D <sub>9</sub> K <sub>9</sub> D <sub>9</sub> E <sub>14</sub> I <sub>9</sub> E <sub>10</sub> A <sub>9</sub> E <sub>9</sub> M <sub>9</sub> T <sub>9</sub> K <sub>9</sub> L <sub>9</sub> K <sub>10</sub> E <sub>9</sub> L <sub>9</sub> W <sub>9</sub> S <sub>9</sub> S <sub>9</sub> N <sub>9</sub> K <sub>9</sub><br>F <sub>5</sub> A <sub>4</sub> K <sub>4</sub> G <sub>4</sub> V <sub>4</sub> D <sub>4</sub> R <sub>4</sub> D <sub>4</sub> V <sub>2</sub> F <sub>4</sub> I <sub>4</sub> F <sub>1</sub> V <sub>4</sub> Q <sub>4</sub> A <sub>4</sub> I <sub>4</sub> D <sub>4</sub> K <sub>4</sub> D <sub>4</sub> E <sub>4</sub> I <sub>4</sub> E <sub>5</sub> A <sub>4</sub> M <sub>4</sub> T <sub>4</sub> K <sub>4</sub> L <sub>4</sub> K <sub>5</sub> E <sub>4</sub> L <sub>4</sub> W <sub>4</sub> S <sub>4</sub> N <sub>4</sub> N <sub>4</sub> K <sub>4</sub> P <sub>4</sub> T <sub>4</sub> K <sub>2</sub> T <sub>5</sub><br>S <sub>1</sub> A <sub>1</sub> K <sub>1</sub> G <sub>1</sub> E <sub>1</sub> I <sub>1</sub> F <sub>1</sub> N <sub>1</sub> L <sub>1</sub> D <sub>1</sub> V <sub>1</sub> V <sub>2</sub> A <sub>1</sub> I <sub>1</sub> G <sub>2</sub> K <sub>1</sub> I <sub>1</sub> A <sub>1</sub> M <sub>1</sub> T <sub>1</sub> A <sub>2</sub> E <sub>1</sub> E <sub>1</sub> M <sub>1</sub> W <sub>1</sub> S <sub>1</sub> N <sub>1</sub> K <sub>2</sub> N <sub>2</sub> S <sub>2</sub><br>L <sub>1</sub> V <sub>1</sub> R <sub>1</sub> Q <sub>1</sub> L <sub>1</sub> Q <sub>1</sub> N <sub>1</sub> K <sub>1</sub> P <sub>1</sub>                                                                                                                                                                                                                                                                                                                                                                                |      |      |      |      |      |      |      |
| 2565                                                                                                                                                                                                                                                                                                                                                                                                                                                                                                                                                                                                                                                                                                                                                                                                                                                                                                                                                                                                                                                                                                                                                                                                                                                                                                                                                                                                                                                                                                                                                                                                                                                                                                                                                                                                                                                                                                                                                                                                                                                                                                                                                                                                                                     | 2570 | 2575 | 2580 | 2585 | 2590 | 2595 | 2600 |
| P <sub>9</sub> T <sub>10</sub> K <sub>9</sub> T <sub>9</sub> R <sub>9</sub> S <sub>13</sub> P <sub>9</sub> F <sub>9</sub> E <sub>9</sub> S <sub>10</sub> S <sub>9</sub> S <sub>9</sub> L <sub>9</sub> R <sub>9</sub> A <sub>13</sub> P <sub>9</sub> Q <sub>9</sub> V <sub>9</sub> A <sub>9</sub> R <sub>9</sub> V <sub>9</sub> N <sub>9</sub> E <sub>9</sub> L <sub>13</sub> L <sub>9</sub> S <sub>9</sub> Q <sub>9</sub> L <sub>9</sub> K <sub>9</sub> D <sub>9</sub> A <sub>9</sub> G <sub>9</sub> M <sub>9</sub> Q <sub>9</sub> T <sub>9</sub> S <sub>10</sub> K <sub>9</sub> S <sub>9</sub> P <sub>13</sub> C <sub>9</sub><br>R <sub>4</sub> S <sub>4</sub> P <sub>4</sub> F <sub>4</sub> E <sub>4</sub> F <sub>1</sub> S <sub>4</sub> S <sub>4</sub> L <sub>4</sub> R <sub>4</sub> A <sub>4</sub> P <sub>4</sub> Q <sub>4</sub> V <sub>4</sub> Q <sub>1</sub> R <sub>4</sub> V <sub>4</sub> N <sub>4</sub> E <sub>4</sub> L <sub>4</sub> L <sub>4</sub> K <sub>2</sub> Q <sub>4</sub> K <sub>1</sub> K <sub>4</sub> D <sub>4</sub> A <sub>4</sub> G <sub>4</sub> M <sub>2</sub> Q <sub>4</sub> T <sub>4</sub> S <sub>4</sub> K <sub>4</sub> S <sub>4</sub> P <sub>4</sub> C <sub>4</sub> G <sub>4</sub> E <sub>4</sub> G <sub>1</sub> D <sub>4</sub><br>S <sub>1</sub> S <sub>1</sub> S <sub>1</sub> P <sub>1</sub> E <sub>1</sub> K <sub>1</sub> L <sub>1</sub> R <sub>1</sub> A <sub>1</sub> P <sub>1</sub> V <sub>1</sub> A <sub>1</sub> R <sub>1</sub> V <sub>1</sub> N <sub>1</sub> E <sub>1</sub> Q <sub>2</sub> L <sub>1</sub> Q <sub>1</sub> L <sub>1</sub> K <sub>1</sub> D <sub>1</sub> I <sub>1</sub> G <sub>1</sub> M <sub>1</sub> Q <sub>1</sub> T <sub>1</sub> K <sub>1</sub> P <sub>1</sub> C <sub>1</sub> E <sub>1</sub><br>R <sub>1</sub> L <sub>1</sub> V <sub>1</sub> A <sub>1</sub>                                                                                                                                                                                                                                                                                                                                                                                                                             |      |      |      |      |      |      |      |
| 2605                                                                                                                                                                                                                                                                                                                                                                                                                                                                                                                                                                                                                                                                                                                                                                                                                                                                                                                                                                                                                                                                                                                                                                                                                                                                                                                                                                                                                                                                                                                                                                                                                                                                                                                                                                                                                                                                                                                                                                                                                                                                                                                                                                                                                                     | 2610 | 2615 | 2620 | 2625 | 2630 | 2635 | 2640 |
| G <sub>9</sub> E <sub>9</sub> P <sub>9</sub> D <sub>9</sub> E <sub>10</sub> G <sub>9</sub> E <sub>9</sub> V <sub>9</sub> A <sub>9</sub> S <sub>13</sub> P <sub>9</sub> E <sub>9</sub> S <sub>9</sub> S <sub>9</sub> E <sub>10</sub> D <sub>8</sub> E <sub>9</sub> E <sub>9</sub> Q <sub>9</sub> R <sub>5</sub> K <sub>5</sub> D <sub>7</sub> K <sub>10</sub> G <sub>9</sub> K <sub>9</sub> A <sub>8</sub> P <sub>7</sub> M <sub>5</sub> E <sub>13</sub> P <sub>7</sub> P <sub>8</sub> A <sub>8</sub> E <sub>8</sub> R <sub>8</sub> S <sub>7</sub> Q <sub>9</sub> S <sub>9</sub> E <sub>8</sub> K <sub>8</sub> S <sub>9</sub><br>E <sub>4</sub> G <sub>4</sub> E <sub>5</sub> V <sub>4</sub> A <sub>4</sub> S <sub>4</sub> P <sub>4</sub> E <sub>4</sub> S <sub>4</sub> E <sub>1</sub> E <sub>4</sub> D <sub>4</sub> E <sub>5</sub> E <sub>4</sub> Q <sub>4</sub> Q <sub>4</sub> T <sub>2</sub> D <sub>3</sub> K <sub>4</sub> G <sub>4</sub> T <sub>5</sub> A <sub>3</sub> P <sub>4</sub> M <sub>4</sub> E <sub>4</sub> P <sub>2</sub> S <sub>2</sub> V <sub>4</sub> P <sub>1</sub> K <sub>1</sub> S <sub>3</sub> Q <sub>4</sub> S <sub>2</sub> E <sub>3</sub> K <sub>3</sub> S <sub>4</sub> V <sub>2</sub> G <sub>3</sub> E <sub>3</sub> G <sub>2</sub><br>P <sub>1</sub> D <sub>1</sub> G <sub>1</sub> V <sub>1</sub> V <sub>1</sub> A <sub>1</sub> S <sub>1</sub> P <sub>1</sub> S <sub>1</sub> S <sub>1</sub> D <sub>1</sub> G <sub>1</sub> Q <sub>1</sub> N <sub>1</sub> T <sub>1</sub> N <sub>1</sub> M <sub>1</sub> G <sub>1</sub> A <sub>1</sub> P <sub>1</sub> S <sub>2</sub> E <sub>1</sub> T <sub>3</sub> H <sub>1</sub> E <sub>1</sub> K <sub>1</sub> T <sub>1</sub> K <sub>1</sub> F <sub>1</sub> E <sub>1</sub> K <sub>1</sub> S <sub>2</sub> M <sub>1</sub> F <sub>1</sub><br>E <sub>1</sub> V <sub>1</sub> R <sub>1</sub> W <sub>1</sub> T <sub>1</sub> M <sub>1</sub> T <sub>1</sub> P <sub>1</sub> L <sub>1</sub> N <sub>1</sub> P <sub>1</sub> Q <sub>1</sub> G <sub>1</sub> M <sub>1</sub> A <sub>1</sub> D <sub>1</sub><br>R <sub>1</sub> Q <sub>1</sub> N <sub>1</sub> A <sub>1</sub> Q <sub>1</sub> Q <sub>1</sub> N <sub>1</sub> L <sub>1</sub> T <sub>1</sub> N <sub>1</sub><br>T <sub>1</sub><br>S <sub>1</sub> |      |      |      |      |      |      |      |

Supplemental Figure 2. UCBSV AA variability determined using datamonkey.org.

| 5                                                                                                                                                                                                                                                                                                                                                                                                                                                                                                                                                                                                                       | 10                                           | 15                                           | 20                                                                         | 25                                           | 30                                                          | 35                                                                   | 40                                                                               |
|-------------------------------------------------------------------------------------------------------------------------------------------------------------------------------------------------------------------------------------------------------------------------------------------------------------------------------------------------------------------------------------------------------------------------------------------------------------------------------------------------------------------------------------------------------------------------------------------------------------------------|----------------------------------------------|----------------------------------------------|----------------------------------------------------------------------------|----------------------------------------------|-------------------------------------------------------------|----------------------------------------------------------------------|----------------------------------------------------------------------------------|
| M <sub>1</sub> S <sub>1</sub> T <sub>1</sub> L <sub>1</sub> Q <sub>1</sub> L <sub>1</sub> F <sub>1</sub> K <sub>1</sub> T <sub>1</sub> L <sub>1</sub> S <sub>1</sub> F <sub>1</sub> G <sub>1</sub> S <sub>1</sub> F <sub>1</sub> E <sub>1</sub> P <sub>1</sub> V <sub>1</sub> K <sub>1</sub> L <sub>1</sub> D <sub>1</sub> E <sub>1</sub> G <sub>1</sub> N <sub>1</sub> N <sub>1</sub> V <sub>1</sub> M <sub>1</sub> E <sub>1</sub> K <sub>1</sub> I <sub>1</sub> P <sub>1</sub> V <sub>1</sub> D <sub>1</sub> L <sub>1</sub> L <sub>1</sub> A <sub>1</sub> G <sub>1</sub> N <sub>1</sub> D <sub>1</sub> G <sub>1</sub> |                                              |                                              |                                                                            |                                              |                                                             |                                                                      |                                                                                  |
|                                                                                                                                                                                                                                                                                                                                                                                                                                                                                                                                                                                                                         | T <sub>5</sub><br>K <sub>1</sub>             |                                              | I <sub>1</sub>                                                             | G <sub>1</sub> E <sub>2</sub> G <sub>1</sub> | I <sub>1</sub> V <sub>5</sub>                               | V <sub>7</sub><br>T <sub>3</sub><br>L <sub>2</sub><br>A <sub>2</sub> | Q <sub>1</sub> T <sub>4</sub><br>D <sub>1</sub> S <sub>3</sub><br>M <sub>1</sub> |
| 45                                                                                                                                                                                                                                                                                                                                                                                                                                                                                                                                                                                                                      | 50                                           | 55                                           | 60                                                                         | 65                                           | 70                                                          | 75                                                                   | 80                                                                               |
| S <sub>1</sub> G <sub>1</sub> P <sub>1</sub> E <sub>1</sub> E <sub>1</sub> Q <sub>1</sub> S <sub>1</sub> E <sub>1</sub> Q <sub>1</sub> K <sub>1</sub> Y <sub>1</sub> H <sub>1</sub> S <sub>1</sub> K <sub>1</sub> E <sub>1</sub> S <sub>1</sub> G <sub>1</sub> E <sub>1</sub> S <sub>1</sub> W <sub>1</sub> R <sub>1</sub> K <sub>1</sub> V <sub>1</sub> T <sub>1</sub> D <sub>1</sub> L <sub>1</sub> Y <sub>1</sub> S <sub>1</sub> V <sub>1</sub> I <sub>1</sub> G <sub>1</sub> N <sub>1</sub> S <sub>1</sub> V <sub>1</sub> Y <sub>1</sub> C <sub>1</sub> R <sub>1</sub> S <sub>1</sub> Y <sub>1</sub> V <sub>1</sub> |                                              |                                              |                                                                            |                                              |                                                             |                                                                      |                                                                                  |
| F <sub>3</sub>                                                                                                                                                                                                                                                                                                                                                                                                                                                                                                                                                                                                          | G <sub>1</sub> T <sub>1</sub> K <sub>1</sub> | H <sub>3</sub> G <sub>1</sub> G <sub>1</sub> | K <sub>1</sub>                                                             |                                              | M <sub>1</sub>                                              |                                                                      |                                                                                  |
|                                                                                                                                                                                                                                                                                                                                                                                                                                                                                                                                                                                                                         | Q <sub>2</sub>                               |                                              |                                                                            |                                              |                                                             |                                                                      |                                                                                  |
| 85                                                                                                                                                                                                                                                                                                                                                                                                                                                                                                                                                                                                                      | 90                                           | 95                                           | 100                                                                        | 105                                          | 110                                                         | 115                                                                  | 120                                                                              |
| A <sub>1</sub> M <sub>1</sub> K <sub>1</sub> N <sub>1</sub> F <sub>1</sub> L <sub>1</sub> N <sub>1</sub> D <sub>1</sub> T <sub>1</sub> K <sub>1</sub> W <sub>1</sub> G <sub>1</sub> G <sub>1</sub> L <sub>1</sub> F <sub>1</sub> K <sub>1</sub> N <sub>1</sub> K <sub>1</sub> K <sub>1</sub> G <sub>1</sub> Q <sub>1</sub> E <sub>1</sub> L <sub>1</sub> K <sub>1</sub> A <sub>1</sub> A <sub>1</sub> A <sub>1</sub> S <sub>1</sub> L <sub>1</sub> S <sub>1</sub> S <sub>1</sub> A <sub>1</sub> T <sub>1</sub> S <sub>1</sub> Y <sub>1</sub> G <sub>1</sub> F <sub>1</sub> M <sub>1</sub> Y <sub>1</sub> D <sub>1</sub> |                                              |                                              |                                                                            |                                              |                                                             |                                                                      |                                                                                  |
|                                                                                                                                                                                                                                                                                                                                                                                                                                                                                                                                                                                                                         | A <sub>1</sub>                               |                                              | S <sub>3</sub>                                                             |                                              |                                                             |                                                                      |                                                                                  |
| 125                                                                                                                                                                                                                                                                                                                                                                                                                                                                                                                                                                                                                     | 130                                          | 135                                          | 140                                                                        | 145                                          | 150                                                         | 155                                                                  | 160                                                                              |
| P <sub>1</sub> V <sub>1</sub> A <sub>1</sub> C <sub>1</sub> A <sub>1</sub> F <sub>1</sub> E <sub>1</sub> C <sub>1</sub> P <sub>1</sub> V <sub>1</sub> C <sub>1</sub> S <sub>1</sub> T <sub>1</sub> K <sub>1</sub> A <sub>1</sub> T <sub>1</sub> A <sub>1</sub> L <sub>1</sub> E <sub>1</sub> A <sub>1</sub> F <sub>1</sub> T <sub>1</sub> S <sub>1</sub> D <sub>1</sub> C <sub>1</sub> D <sub>1</sub> H <sub>1</sub> C <sub>1</sub> F <sub>1</sub> E <sub>1</sub> L <sub>1</sub> K <sub>1</sub> H <sub>1</sub> I <sub>1</sub> D <sub>1</sub> D <sub>1</sub> D <sub>1</sub> S <sub>1</sub> I <sub>1</sub> V <sub>1</sub> |                                              |                                              |                                                                            |                                              |                                                             |                                                                      |                                                                                  |
|                                                                                                                                                                                                                                                                                                                                                                                                                                                                                                                                                                                                                         |                                              | M <sub>1</sub> S <sub>5</sub> S <sub>1</sub> |                                                                            |                                              | V <sub>3</sub>                                              | E <sub>5</sub> N <sub>3</sub><br>G <sub>1</sub> F <sub>1</sub>       | V <sub>3</sub>                                                                   |
| 165                                                                                                                                                                                                                                                                                                                                                                                                                                                                                                                                                                                                                     | 170                                          | 175                                          | 180                                                                        | 185                                          | 190                                                         | 195                                                                  | 200                                                                              |
| Q <sub>1</sub> T <sub>1</sub> E <sub>1</sub> T <sub>1</sub> K <sub>1</sub> F <sub>1</sub> Y <sub>1</sub> P <sub>1</sub> M <sub>1</sub> N <sub>1</sub> P <sub>1</sub> I <sub>1</sub> E <sub>1</sub> L <sub>1</sub> D <sub>1</sub> V <sub>1</sub> E <sub>1</sub> D <sub>1</sub> N <sub>1</sub> L <sub>1</sub> V <sub>1</sub> E <sub>1</sub> A <sub>1</sub> A <sub>1</sub> S <sub>1</sub> L <sub>1</sub> E <sub>1</sub> W <sub>1</sub> L <sub>1</sub> K <sub>1</sub> G <sub>1</sub> D <sub>1</sub> V <sub>1</sub> E <sub>1</sub> E <sub>1</sub> S <sub>1</sub> V <sub>1</sub> V <sub>1</sub> D <sub>1</sub> S <sub>1</sub> |                                              |                                              |                                                                            |                                              |                                                             |                                                                      |                                                                                  |
| D <sub>4</sub>                                                                                                                                                                                                                                                                                                                                                                                                                                                                                                                                                                                                          | V <sub>1</sub>                               | I <sub>1</sub> D <sub>7</sub>                | G <sub>4</sub> I <sub>2</sub>                                              |                                              | V <sub>3</sub> G <sub>1</sub> S <sub>4</sub> E <sub>2</sub> | K <sub>3</sub> I <sub>3</sub>                                        |                                                                                  |
|                                                                                                                                                                                                                                                                                                                                                                                                                                                                                                                                                                                                                         |                                              |                                              | M <sub>1</sub>                                                             |                                              | M <sub>1</sub> H <sub>1</sub>                               |                                                                      |                                                                                  |
| 205                                                                                                                                                                                                                                                                                                                                                                                                                                                                                                                                                                                                                     | 210                                          | 215                                          | 220                                                                        | 225                                          | 230                                                         | 235                                                                  | 240                                                                              |
| V <sub>1</sub> L <sub>1</sub> L <sub>1</sub> L <sub>1</sub> E <sub>1</sub> D <sub>1</sub> K <sub>1</sub> E <sub>1</sub> R <sub>1</sub> V <sub>1</sub> T <sub>1</sub> K <sub>1</sub> K <sub>1</sub> A <sub>1</sub> L <sub>1</sub> V <sub>1</sub> K <sub>1</sub> S <sub>1</sub> S <sub>1</sub> A <sub>1</sub> E <sub>1</sub> T <sub>1</sub> K <sub>1</sub> L <sub>1</sub> V <sub>1</sub> A <sub>1</sub> N <sub>1</sub> V <sub>1</sub> A <sub>1</sub> D <sub>1</sub> L <sub>1</sub> T <sub>1</sub> K <sub>1</sub> K <sub>1</sub> L <sub>1</sub> T <sub>1</sub> E <sub>1</sub> I <sub>1</sub> C <sub>1</sub>                |                                              |                                              |                                                                            |                                              |                                                             |                                                                      |                                                                                  |
| M <sub>2</sub>                                                                                                                                                                                                                                                                                                                                                                                                                                                                                                                                                                                                          | E <sub>2</sub> S <sub>1</sub>                | I <sub>1</sub>                               | I <sub>1</sub> K <sub>2</sub> G <sub>1</sub> S <sub>4</sub>                | M <sub>2</sub> S <sub>3</sub>                | A <sub>2</sub> S <sub>5</sub> N <sub>2</sub>                | S <sub>5</sub> S <sub>1</sub>                                        |                                                                                  |
|                                                                                                                                                                                                                                                                                                                                                                                                                                                                                                                                                                                                                         |                                              |                                              | M <sub>1</sub>                                                             | G <sub>1</sub>                               | I <sub>1</sub>                                              |                                                                      |                                                                                  |
| 245                                                                                                                                                                                                                                                                                                                                                                                                                                                                                                                                                                                                                     | 250                                          | 255                                          | 260                                                                        | 265                                          | 270                                                         | 275                                                                  | 280                                                                              |
| C <sub>1</sub> E <sub>1</sub> S <sub>1</sub> G <sub>1</sub> I <sub>1</sub> P <sub>1</sub> I <sub>1</sub> D <sub>1</sub> L <sub>1</sub> D <sub>1</sub> N <sub>1</sub> S <sub>1</sub> K <sub>1</sub> S <sub>1</sub> K <sub>1</sub> A <sub>1</sub> I <sub>1</sub> P <sub>1</sub> M <sub>1</sub> V <sub>1</sub> K <sub>1</sub> L <sub>1</sub> K <sub>1</sub> H <sub>1</sub> I <sub>1</sub> F <sub>1</sub> G <sub>1</sub> K <sub>1</sub> I <sub>1</sub> E <sub>1</sub> C <sub>1</sub> D <sub>1</sub> D <sub>1</sub> M <sub>1</sub> F <sub>1</sub> E <sub>1</sub> E <sub>1</sub> D <sub>1</sub> R <sub>1</sub>                |                                              |                                              |                                                                            |                                              |                                                             |                                                                      |                                                                                  |
|                                                                                                                                                                                                                                                                                                                                                                                                                                                                                                                                                                                                                         | M <sub>4</sub> C <sub>4</sub>                |                                              | M <sub>1</sub> I <sub>2</sub>                                              |                                              | S <sub>1</sub> V <sub>3</sub>                               | G <sub>2</sub> D <sub>4</sub>                                        |                                                                                  |
|                                                                                                                                                                                                                                                                                                                                                                                                                                                                                                                                                                                                                         |                                              |                                              | A <sub>1</sub>                                                             |                                              |                                                             |                                                                      |                                                                                  |
| 285                                                                                                                                                                                                                                                                                                                                                                                                                                                                                                                                                                                                                     | 290                                          | 295                                          | 300                                                                        | 305                                          | 310                                                         | 315                                                                  | 320                                                                              |
| Y <sub>1</sub> F <sub>1</sub> L <sub>1</sub> E <sub>1</sub> H <sub>1</sub> S <sub>1</sub> N <sub>1</sub> A <sub>1</sub> G <sub>1</sub> K <sub>1</sub> I <sub>1</sub> F <sub>1</sub> R <sub>1</sub> S <sub>1</sub> C <sub>1</sub> E <sub>1</sub> K <sub>1</sub> I <sub>1</sub> T <sub>1</sub> Y <sub>1</sub> S <sub>1</sub> M <sub>1</sub> I <sub>1</sub> R <sub>1</sub> P <sub>1</sub> G <sub>1</sub> W <sub>1</sub> S <sub>1</sub> G <sub>1</sub> A <sub>1</sub> I <sub>1</sub> I <sub>1</sub> L <sub>1</sub> K <sub>1</sub> D <sub>1</sub> N <sub>1</sub> V <sub>1</sub> Q <sub>1</sub> G <sub>1</sub> E <sub>1</sub> |                                              |                                              |                                                                            |                                              |                                                             |                                                                      |                                                                                  |
| H <sub>3</sub>                                                                                                                                                                                                                                                                                                                                                                                                                                                                                                                                                                                                          | E <sub>4</sub> S <sub>4</sub>                |                                              | S <sub>3</sub> V <sub>2</sub> F <sub>1</sub> K <sub>2</sub>                |                                              |                                                             | S <sub>5</sub>                                                       | S <sub>7</sub>                                                                   |
|                                                                                                                                                                                                                                                                                                                                                                                                                                                                                                                                                                                                                         | N <sub>2</sub> N <sub>2</sub>                |                                              | T <sub>2</sub> R <sub>1</sub>                                              |                                              |                                                             |                                                                      |                                                                                  |
|                                                                                                                                                                                                                                                                                                                                                                                                                                                                                                                                                                                                                         | R <sub>2</sub>                               |                                              |                                                                            |                                              |                                                             |                                                                      |                                                                                  |
|                                                                                                                                                                                                                                                                                                                                                                                                                                                                                                                                                                                                                         | K <sub>1</sub>                               |                                              |                                                                            |                                              |                                                             |                                                                      |                                                                                  |
| 325                                                                                                                                                                                                                                                                                                                                                                                                                                                                                                                                                                                                                     | 330                                          | 335                                          | 340                                                                        | 345                                          | 350                                                         | 355                                                                  | 360                                                                              |
| D <sub>1</sub> H <sub>1</sub> D <sub>1</sub> K <sub>1</sub> F <sub>1</sub> D <sub>1</sub> F <sub>1</sub> I <sub>1</sub> N <sub>1</sub> D <sub>1</sub> I <sub>1</sub> C <sub>1</sub> V <sub>1</sub> V <sub>1</sub> Q <sub>1</sub> G <sub>1</sub> K <sub>1</sub> N <sub>1</sub> L <sub>1</sub> L <sub>1</sub> S <sub>1</sub> N <sub>1</sub> K <sub>1</sub> I <sub>1</sub> E <sub>1</sub> N <sub>1</sub> A <sub>1</sub> M <sub>1</sub> R <sub>1</sub> V <sub>1</sub> K <sub>1</sub> T <sub>1</sub> E <sub>1</sub> T <sub>1</sub> E <sub>1</sub> M <sub>1</sub> D <sub>1</sub> L <sub>1</sub> I <sub>1</sub> D <sub>1</sub> |                                              |                                              |                                                                            |                                              |                                                             |                                                                      |                                                                                  |
| R <sub>1</sub> G <sub>1</sub>                                                                                                                                                                                                                                                                                                                                                                                                                                                                                                                                                                                           | D <sub>1</sub>                               |                                              | S <sub>2</sub> M <sub>2</sub> D <sub>1</sub> Y <sub>3</sub> S <sub>2</sub> |                                              | I <sub>1</sub> K <sub>1</sub> A <sub>1</sub>                | L <sub>1</sub>                                                       |                                                                                  |
| E <sub>1</sub>                                                                                                                                                                                                                                                                                                                                                                                                                                                                                                                                                                                                          |                                              |                                              | N <sub>1</sub> G <sub>1</sub>                                              |                                              | T <sub>1</sub>                                              | V <sub>1</sub>                                                       |                                                                                  |
|                                                                                                                                                                                                                                                                                                                                                                                                                                                                                                                                                                                                                         |                                              |                                              | K <sub>1</sub>                                                             |                                              |                                                             |                                                                      |                                                                                  |
| 365                                                                                                                                                                                                                                                                                                                                                                                                                                                                                                                                                                                                                     | 370                                          | 375                                          | 380                                                                        | 385                                          | 390                                                         | 395                                                                  | 400                                                                              |
| L <sub>1</sub> Y <sub>1</sub> S <sub>1</sub> F <sub>1</sub> N <sub>1</sub> L <sub>1</sub> S <sub>1</sub> W <sub>1</sub> A <sub>1</sub> K <sub>1</sub> S <sub>1</sub> K <sub>1</sub> D <sub>1</sub> K <sub>1</sub> F <sub>1</sub> I <sub>1</sub> K <sub>1</sub> H <sub>1</sub> F <sub>1</sub> E <sub>1</sub> S <sub>1</sub> D <sub>1</sub> T <sub>1</sub> T <sub>1</sub> Q <sub>1</sub> L <sub>1</sub> I <sub>1</sub> S <sub>1</sub> S <sub>1</sub> C <sub>1</sub> C <sub>1</sub> T <sub>1</sub> P <sub>1</sub> S <sub>1</sub> T <sub>1</sub> L <sub>1</sub> W <sub>1</sub> L <sub>1</sub> Y <sub>1</sub> A <sub>1</sub> |                                              |                                              |                                                                            |                                              |                                                             |                                                                      |                                                                                  |
| A <sub>2</sub> D <sub>2</sub> N <sub>4</sub>                                                                                                                                                                                                                                                                                                                                                                                                                                                                                                                                                                            |                                              | F <sub>1</sub>                               | G <sub>2</sub> M <sub>2</sub>                                              |                                              | V <sub>6</sub> K <sub>2</sub>                               |                                                                      |                                                                                  |
|                                                                                                                                                                                                                                                                                                                                                                                                                                                                                                                                                                                                                         |                                              |                                              | A <sub>1</sub>                                                             |                                              | M <sub>2</sub>                                              |                                                                      |                                                                                  |
| 405                                                                                                                                                                                                                                                                                                                                                                                                                                                                                                                                                                                                                     | 410                                          | 415                                          | 420                                                                        | 425                                          | 430                                                         | 435                                                                  | 440                                                                              |
| S <sub>1</sub> K <sub>1</sub> A <sub>1</sub> S <sub>1</sub> F <sub>1</sub> Y <sub>1</sub> K <sub>1</sub> F <sub>1</sub> V <sub>1</sub> D <sub>1</sub> H <sub>1</sub> M <sub>1</sub> I <sub>1</sub> L <sub>1</sub> K <sub>1</sub> G <sub>1</sub> S <sub>1</sub> P <sub>1</sub> M <sub>1</sub> I <sub>1</sub> D <sub>1</sub> I <sub>1</sub> L <sub>1</sub> V <sub>1</sub> K <sub>1</sub> M <sub>1</sub> E <sub>1</sub> Y <sub>1</sub> V <sub>1</sub> G <sub>1</sub> K <sub>1</sub> H <sub>1</sub> L <sub>1</sub> D <sub>1</sub> M <sub>1</sub> F <sub>1</sub> N <sub>1</sub> S <sub>1</sub> V <sub>1</sub> E <sub>1</sub> |                                              |                                              |                                                                            |                                              |                                                             |                                                                      |                                                                                  |
| R <sub>1</sub>                                                                                                                                                                                                                                                                                                                                                                                                                                                                                                                                                                                                          | Y <sub>2</sub>                               |                                              | L <sub>1</sub>                                                             |                                              |                                                             | E <sub>2</sub> L <sub>2</sub>                                        | I <sub>1</sub> D <sub>2</sub>                                                    |
| 445                                                                                                                                                                                                                                                                                                                                                                                                                                                                                                                                                                                                                     | 450                                          | 455                                          | 460                                                                        | 465                                          | 470                                                         | 475                                                                  | 480                                                                              |
| D <sub>1</sub> V <sub>1</sub> C <sub>1</sub> T <sub>1</sub> E <sub>1</sub> Y <sub>1</sub> S <sub>1</sub> H <sub>1</sub> F <sub>1</sub> M <sub>1</sub> K <sub>1</sub> E <sub>1</sub> L <sub>1</sub> S <sub>1</sub> E <sub>1</sub> T <sub>1</sub> V <sub>1</sub> N <sub>1</sub> D <sub>1</sub> K <sub>1</sub> S <sub>1</sub> D <sub>1</sub> P <sub>1</sub> D <sub>1</sub> V <sub>1</sub> L <sub>1</sub> R <sub>1</sub> V <sub>1</sub> S <sub>1</sub> N <sub>1</sub> L <sub>1</sub> I <sub>1</sub> S <sub>1</sub> A <sub>1</sub> H <sub>1</sub> F <sub>1</sub> E <sub>1</sub> S <sub>1</sub> V <sub>1</sub>                |                                              |                                              |                                                                            |                                              |                                                             |                                                                      |                                                                                  |
|                                                                                                                                                                                                                                                                                                                                                                                                                                                                                                                                                                                                                         | I <sub>2</sub> A <sub>2</sub>                | M <sub>1</sub>                               | M <sub>2</sub>                                                             | L <sub>1</sub> E <sub>1</sub>                |                                                             | M <sub>2</sub> M <sub>2</sub> R <sub>2</sub>                         |                                                                                  |
| 485                                                                                                                                                                                                                                                                                                                                                                                                                                                                                                                                                                                                                     | 490                                          | 495                                          | 500                                                                        | 505                                          | 510                                                         | 515                                                                  | 520                                                                              |
| L <sub>1</sub> E <sub>1</sub> Y <sub>1</sub> N <sub>1</sub> K <sub>1</sub> Y <sub>1</sub> E <sub>1</sub> L <sub>1</sub> M <sub>1</sub> D <sub>1</sub> S <sub>1</sub> M <sub>1</sub> I <sub>1</sub> E <sub>1</sub> K <sub>1</sub> K <sub>1</sub> T <sub>1</sub> Q <sub>1</sub> L <sub>1</sub> E <sub>1</sub> A <sub>1</sub> Q <sub>1</sub> E <sub>1</sub> I <sub>1</sub> M <sub>1</sub> S <sub>1</sub> R <sub>1</sub> E <sub>1</sub> L <sub>1</sub> L <sub>1</sub> K <sub>1</sub> H <sub>1</sub> Q <sub>1</sub> Y <sub>1</sub> G <sub>1</sub> E <sub>1</sub> L <sub>1</sub> F <sub>1</sub> S <sub>1</sub> W <sub>1</sub> |                                              |                                              |                                                                            |                                              |                                                             |                                                                      |                                                                                  |
|                                                                                                                                                                                                                                                                                                                                                                                                                                                                                                                                                                                                                         | I <sub>2</sub>                               | V <sub>2</sub> M <sub>5</sub>                |                                                                            | V <sub>1</sub>                               |                                                             | S <sub>4</sub>                                                       | S <sub>1</sub>                                                                   |
|                                                                                                                                                                                                                                                                                                                                                                                                                                                                                                                                                                                                                         | I <sub>1</sub>                               |                                              |                                                                            |                                              |                                                             |                                                                      |                                                                                  |

|                                                                                                                                                                                                                                                                                                                                                                                                                                                                                                                                                                                                                                                                 |                                              |                |                               |                                              |                                              |                                              |                                              |
|-----------------------------------------------------------------------------------------------------------------------------------------------------------------------------------------------------------------------------------------------------------------------------------------------------------------------------------------------------------------------------------------------------------------------------------------------------------------------------------------------------------------------------------------------------------------------------------------------------------------------------------------------------------------|----------------------------------------------|----------------|-------------------------------|----------------------------------------------|----------------------------------------------|----------------------------------------------|----------------------------------------------|
| 525                                                                                                                                                                                                                                                                                                                                                                                                                                                                                                                                                                                                                                                             | 530                                          | 535            | 540                           | 545                                          | 550                                          | 555                                          | 560                                          |
| R <sub>14</sub> E <sub>14</sub> R <sub>14</sub> L <sub>14</sub> C <sub>14</sub> L <sub>14</sub> K <sub>14</sub> L <sub>14</sub> G <sub>14</sub> M <sub>14</sub> G <sub>14</sub> S <sub>14</sub> S <sub>14</sub> N <sub>14</sub> L <sub>14</sub> Y <sub>14</sub> T <sub>14</sub> Y <sub>14</sub> W <sub>14</sub> V <sub>14</sub> E <sub>14</sub> R <sub>14</sub> E <sub>14</sub> E <sub>14</sub> K <sub>14</sub> Q <sub>14</sub> S <sub>14</sub> E <sub>14</sub> K <sub>14</sub> S <sub>14</sub> S <sub>14</sub> A <sub>14</sub> L <sub>14</sub> S <sub>14</sub> C <sub>14</sub> I <sub>14</sub> I <sub>14</sub> S <sub>14</sub> K <sub>14</sub> P <sub>14</sub> |                                              |                |                               |                                              |                                              |                                              |                                              |
| M <sub>1</sub> Y <sub>3</sub> M <sub>2</sub> S <sub>2</sub>                                                                                                                                                                                                                                                                                                                                                                                                                                                                                                                                                                                                     |                                              |                | E <sub>2</sub>                | S <sub>2</sub> H <sub>2</sub> L <sub>1</sub> | S <sub>1</sub> N <sub>4</sub> V <sub>3</sub> | F <sub>2</sub>                               |                                              |
|                                                                                                                                                                                                                                                                                                                                                                                                                                                                                                                                                                                                                                                                 |                                              |                |                               | Q <sub>2</sub>                               |                                              |                                              |                                              |
| 565                                                                                                                                                                                                                                                                                                                                                                                                                                                                                                                                                                                                                                                             | 570                                          | 575            | 580                           | 585                                          | 590                                          | 595                                          | 600                                          |
| G <sub>14</sub> M <sub>14</sub> E <sub>14</sub> M <sub>14</sub> L <sub>14</sub> I <sub>14</sub> N <sub>14</sub> W <sub>14</sub> V <sub>14</sub> S <sub>14</sub> E <sub>14</sub> V <sub>14</sub> C <sub>14</sub> K <sub>14</sub> S <sub>14</sub> K <sub>14</sub> Y <sub>14</sub> H <sub>14</sub> S <sub>14</sub> L <sub>14</sub> V <sub>14</sub> N <sub>14</sub> C <sub>14</sub> V <sub>14</sub> D <sub>14</sub> S <sub>14</sub> G <sub>14</sub> I <sub>14</sub> L <sub>14</sub> F <sub>14</sub> L <sub>14</sub> W <sub>14</sub> S <sub>14</sub> S <sub>14</sub> M <sub>14</sub> V <sub>14</sub> H <sub>14</sub> L <sub>14</sub> A <sub>14</sub> S <sub>14</sub> |                                              |                |                               |                                              |                                              |                                              |                                              |
| M <sub>4</sub> S <sub>2</sub> A <sub>2</sub>                                                                                                                                                                                                                                                                                                                                                                                                                                                                                                                                                                                                                    | A <sub>1</sub> S <sub>1</sub> N <sub>1</sub> |                |                               | N <sub>1</sub> V <sub>2</sub> M <sub>1</sub> |                                              | V <sub>2</sub> I <sub>1</sub>                | M <sub>2</sub> K <sub>4</sub>                |
|                                                                                                                                                                                                                                                                                                                                                                                                                                                                                                                                                                                                                                                                 | I <sub>1</sub>                               |                |                               |                                              |                                              | I <sub>1</sub>                               |                                              |
| 605                                                                                                                                                                                                                                                                                                                                                                                                                                                                                                                                                                                                                                                             | 610                                          | 615            | 620                           | 625                                          | 630                                          | 635                                          | 640                                          |
| V <sub>12</sub> S <sub>14</sub> V <sub>14</sub> Y <sub>14</sub> G <sub>14</sub> Y <sub>14</sub> W <sub>14</sub> N <sub>14</sub> L <sub>14</sub> W <sub>14</sub> F <sub>14</sub> S <sub>14</sub> Q <sub>14</sub> A <sub>14</sub> M <sub>14</sub> C <sub>14</sub> V <sub>14</sub> L <sub>14</sub> F <sub>14</sub> I <sub>14</sub> F <sub>14</sub> L <sub>14</sub> V <sub>12</sub> S <sub>14</sub> N <sub>14</sub> F <sub>14</sub> S <sub>14</sub> S <sub>7</sub> K <sub>14</sub> M <sub>12</sub> V <sub>14</sub> S <sub>11</sub> Y <sub>11</sub> L <sub>14</sub> K <sub>14</sub> K <sub>12</sub> L <sub>14</sub> I <sub>14</sub> V <sub>13</sub> S <sub>11</sub>  |                                              |                |                               |                                              |                                              |                                              |                                              |
| A <sub>2</sub> I <sub>1</sub>                                                                                                                                                                                                                                                                                                                                                                                                                                                                                                                                                                                                                                   |                                              | V <sub>2</sub> | V <sub>1</sub> I <sub>2</sub> |                                              | G <sub>5</sub> L <sub>2</sub>                | N <sub>2</sub> F <sub>3</sub>                | T <sub>2</sub> I <sub>1</sub> N <sub>3</sub> |
|                                                                                                                                                                                                                                                                                                                                                                                                                                                                                                                                                                                                                                                                 |                                              | L <sub>1</sub> |                               |                                              | C <sub>2</sub>                               | G <sub>1</sub>                               |                                              |
| 645                                                                                                                                                                                                                                                                                                                                                                                                                                                                                                                                                                                                                                                             | 650                                          | 655            | 660                           | 665                                          | 670                                          | 675                                          | 680                                          |
| E <sub>14</sub> K <sub>12</sub> K <sub>14</sub> L <sub>14</sub> A <sub>14</sub> M <sub>12</sub> K <sub>14</sub> N <sub>14</sub> E <sub>14</sub> E <sub>12</sub> G <sub>14</sub> F <sub>14</sub> V <sub>13</sub> E <sub>14</sub> V <sub>14</sub> Q <sub>14</sub> G <sub>14</sub> R <sub>14</sub> K <sub>14</sub> E <sub>14</sub> E <sub>14</sub> S <sub>13</sub> F <sub>14</sub> V <sub>14</sub> L <sub>14</sub> K <sub>14</sub> W <sub>14</sub> C <sub>14</sub> A <sub>14</sub> A <sub>11</sub> A <sub>14</sub> T <sub>14</sub> L <sub>14</sub> F <sub>14</sub> L <sub>14</sub> S <sub>14</sub> F <sub>14</sub> L <sub>14</sub> N <sub>14</sub> Y <sub>14</sub> |                                              |                |                               |                                              |                                              |                                              |                                              |
| S <sub>2</sub> I <sub>2</sub>                                                                                                                                                                                                                                                                                                                                                                                                                                                                                                                                                                                                                                   | A <sub>2</sub> I <sub>1</sub>                |                | P <sub>1</sub>                |                                              | V <sub>3</sub>                               |                                              |                                              |
| 685                                                                                                                                                                                                                                                                                                                                                                                                                                                                                                                                                                                                                                                             | 690                                          | 695            | 700                           | 705                                          | 710                                          | 715                                          | 720                                          |
| D <sub>14</sub> W <sub>14</sub> A <sub>14</sub> V <sub>14</sub> G <sub>14</sub> C <sub>14</sub> V <sub>13</sub> S <sub>14</sub> A <sub>14</sub> I <sub>14</sub> G <sub>14</sub> K <sub>14</sub> M <sub>14</sub> K <sub>14</sub> T <sub>14</sub> M <sub>12</sub> F <sub>14</sub> S <sub>12</sub> A <sub>14</sub> L <sub>14</sub> G <sub>14</sub> P <sub>14</sub> D <sub>14</sub> F <sub>14</sub> M <sub>12</sub> E <sub>14</sub> K <sub>10</sub> Q <sub>14</sub> D <sub>14</sub> G <sub>14</sub> D <sub>14</sub> D <sub>14</sub> L <sub>14</sub> K <sub>12</sub> F <sub>14</sub> T <sub>14</sub> T <sub>14</sub> F <sub>14</sub> E <sub>14</sub>                 |                                              |                |                               |                                              |                                              |                                              |                                              |
| M <sub>1</sub>                                                                                                                                                                                                                                                                                                                                                                                                                                                                                                                                                                                                                                                  | I <sub>2</sub> G <sub>2</sub>                |                | I <sub>2</sub> S <sub>4</sub> |                                              |                                              | S <sub>1</sub>                               |                                              |
| 725                                                                                                                                                                                                                                                                                                                                                                                                                                                                                                                                                                                                                                                             | 730                                          | 735            | 740                           | 745                                          | 750                                          | 755                                          | 760                                          |
| V <sub>14</sub> E <sub>14</sub> I <sub>14</sub> P <sub>14</sub> G <sub>14</sub> D <sub>14</sub> S <sub>14</sub> S <sub>14</sub> S <sub>14</sub> S <sub>14</sub> A <sub>14</sub> Q <sub>14</sub> T <sub>14</sub> F <sub>14</sub> G <sub>14</sub> E <sub>14</sub> W <sub>14</sub> I <sub>14</sub> E <sub>14</sub> H <sub>14</sub> C <sub>14</sub> I <sub>14</sub> K <sub>14</sub> F <sub>14</sub> N <sub>14</sub> L <sub>14</sub> V <sub>14</sub> S <sub>14</sub> I <sub>14</sub> E <sub>14</sub> P <sub>14</sub> T <sub>14</sub> T <sub>14</sub> S <sub>14</sub> G <sub>14</sub> P <sub>14</sub> M <sub>14</sub> L <sub>14</sub> T <sub>14</sub>                 |                                              |                |                               |                                              |                                              |                                              |                                              |
|                                                                                                                                                                                                                                                                                                                                                                                                                                                                                                                                                                                                                                                                 |                                              |                | M <sub>2</sub>                | Y <sub>1</sub>                               |                                              |                                              |                                              |
| 765                                                                                                                                                                                                                                                                                                                                                                                                                                                                                                                                                                                                                                                             | 770                                          | 775            | 780                           | 785                                          | 790                                          | 795                                          | 800                                          |
| L <sub>14</sub> E <sub>14</sub> R <sub>14</sub> G <sub>14</sub> K <sub>14</sub> A <sub>14</sub> N <sub>14</sub> E <sub>14</sub> L <sub>14</sub> A <sub>14</sub> D <sub>14</sub> Q <sub>14</sub> M <sub>12</sub> N <sub>14</sub> C <sub>14</sub> L <sub>14</sub> N <sub>14</sub> A <sub>14</sub> T <sub>14</sub> D <sub>14</sub> M <sub>13</sub> R <sub>14</sub> V <sub>14</sub> H <sub>14</sub> G <sub>14</sub> G <sub>14</sub> V <sub>14</sub> G <sub>14</sub> T <sub>14</sub> G <sub>14</sub> K <sub>14</sub> S <sub>14</sub> T <sub>14</sub> A <sub>14</sub> L <sub>14</sub> P <sub>14</sub> Y <sub>14</sub> E <sub>14</sub> L <sub>14</sub> M <sub>14</sub> |                                              |                |                               |                                              |                                              |                                              |                                              |
|                                                                                                                                                                                                                                                                                                                                                                                                                                                                                                                                                                                                                                                                 | I <sub>2</sub>                               |                | I <sub>1</sub>                |                                              |                                              | S <sub>2</sub>                               | T <sub>1</sub>                               |
| 805                                                                                                                                                                                                                                                                                                                                                                                                                                                                                                                                                                                                                                                             | 810                                          | 815            | 820                           | 825                                          | 830                                          | 835                                          | 840                                          |
| S <sub>14</sub> Y <sub>14</sub> G <sub>14</sub> A <sub>14</sub> V <sub>14</sub> L <sub>14</sub> V <sub>13</sub> C <sub>14</sub> V <sub>14</sub> P <sub>14</sub> T <sub>14</sub> S <sub>14</sub> V <sub>14</sub> L <sub>14</sub> A <sub>14</sub> N <sub>14</sub> A <sub>14</sub> L <sub>14</sub> H <sub>14</sub> E <sub>14</sub> S <sub>14</sub> F <sub>14</sub> M <sub>14</sub> S <sub>14</sub> L <sub>14</sub> F <sub>14</sub> G <sub>14</sub> F <sub>14</sub> D <sub>14</sub> V <sub>14</sub> S <sub>14</sub> L <sub>14</sub> A <sub>14</sub> Y <sub>14</sub> R <sub>12</sub> G <sub>13</sub> R <sub>14</sub> V <sub>14</sub> S <sub>14</sub> T <sub>14</sub> |                                              |                |                               |                                              |                                              |                                              |                                              |
| M <sub>1</sub>                                                                                                                                                                                                                                                                                                                                                                                                                                                                                                                                                                                                                                                  |                                              |                |                               |                                              |                                              | S <sub>2</sub> S <sub>1</sub>                |                                              |
| 845                                                                                                                                                                                                                                                                                                                                                                                                                                                                                                                                                                                                                                                             | 850                                          | 855            | 860                           | 865                                          | 870                                          | 875                                          | 880                                          |
| G <sub>14</sub> S <sub>14</sub> K <sub>14</sub> P <sub>14</sub> I <sub>14</sub> T <sub>14</sub> I <sub>14</sub> M <sub>14</sub> T <sub>14</sub> Y <sub>14</sub> G <sub>14</sub> Y <sub>14</sub> A <sub>14</sub> L <sub>14</sub> N <sub>14</sub> H <sub>14</sub> F <sub>14</sub> H <sub>14</sub> H <sub>14</sub> N <sub>14</sub> P <sub>14</sub> S <sub>10</sub> N <sub>14</sub> L <sub>14</sub> A <sub>14</sub> Q <sub>14</sub> F <sub>14</sub> Q <sub>14</sub> F <sub>14</sub> M <sub>13</sub> M <sub>12</sub> M <sub>14</sub> D <sub>14</sub> E <sub>14</sub> V <sub>14</sub> H <sub>14</sub> T <sub>14</sub> F <sub>14</sub> P <sub>14</sub> V <sub>14</sub> |                                              |                |                               |                                              |                                              |                                              |                                              |
|                                                                                                                                                                                                                                                                                                                                                                                                                                                                                                                                                                                                                                                                 |                                              |                | K <sub>4</sub>                |                                              |                                              | V <sub>2</sub> L <sub>2</sub>                |                                              |
|                                                                                                                                                                                                                                                                                                                                                                                                                                                                                                                                                                                                                                                                 |                                              |                |                               |                                              |                                              | I <sub>1</sub>                               |                                              |
| 885                                                                                                                                                                                                                                                                                                                                                                                                                                                                                                                                                                                                                                                             | 890                                          | 895            | 900                           | 905                                          | 910                                          | 915                                          | 920                                          |
| H <sub>14</sub> L <sub>14</sub> N <sub>14</sub> P <sub>14</sub> L <sub>14</sub> F <sub>14</sub> S <sub>14</sub> L <sub>14</sub> L <sub>14</sub> R <sub>14</sub> E <sub>14</sub> L <sub>14</sub> S <sub>14</sub> P <sub>14</sub> D <sub>14</sub> K <sub>14</sub> K <sub>14</sub> M <sub>12</sub> I <sub>14</sub> K <sub>14</sub> T <sub>14</sub> S <sub>14</sub> A <sub>14</sub> T <sub>14</sub> H <sub>14</sub> V <sub>14</sub> G <sub>14</sub> H <sub>14</sub> N <sub>13</sub> V <sub>14</sub> D <sub>14</sub> L <sub>14</sub> S <sub>14</sub> T <sub>14</sub> N <sub>14</sub> H <sub>14</sub> K <sub>14</sub> V <sub>14</sub> D <sub>14</sub> M <sub>12</sub> |                                              |                |                               |                                              |                                              |                                              |                                              |
|                                                                                                                                                                                                                                                                                                                                                                                                                                                                                                                                                                                                                                                                 |                                              | I <sub>2</sub> |                               |                                              | S <sub>1</sub>                               |                                              | I <sub>2</sub>                               |
| 925                                                                                                                                                                                                                                                                                                                                                                                                                                                                                                                                                                                                                                                             | 930                                          | 935            | 940                           | 945                                          | 950                                          | 955                                          | 960                                          |
| H <sub>14</sub> T <sub>14</sub> L <sub>14</sub> E <sub>14</sub> M <sub>9</sub> M <sub>14</sub> D <sub>14</sub> V <sub>14</sub> K <sub>14</sub> W <sub>14</sub> A <sub>14</sub> E <sub>14</sub> L <sub>14</sub> Q <sub>14</sub> G <sub>14</sub> T <sub>14</sub> S <sub>14</sub> V <sub>14</sub> F <sub>14</sub> G <sub>14</sub> D <sub>14</sub> V <sub>14</sub> T <sub>14</sub> K <sub>12</sub> E <sub>14</sub> P <sub>12</sub> G <sub>14</sub> N <sub>14</sub> V <sub>13</sub> L <sub>14</sub> V <sub>13</sub> F <sub>14</sub> V <sub>14</sub> A <sub>14</sub> S <sub>14</sub> Y <sub>14</sub> S <sub>14</sub> D <sub>13</sub> V <sub>14</sub>                  |                                              |                |                               |                                              |                                              |                                              |                                              |
| V <sub>3</sub>                                                                                                                                                                                                                                                                                                                                                                                                                                                                                                                                                                                                                                                  |                                              |                |                               | S <sub>2</sub> H <sub>1</sub>                | I <sub>1</sub> I <sub>1</sub>                |                                              | E <sub>1</sub>                               |
| L <sub>2</sub>                                                                                                                                                                                                                                                                                                                                                                                                                                                                                                                                                                                                                                                  |                                              |                |                               | S <sub>1</sub>                               |                                              |                                              |                                              |
| 965                                                                                                                                                                                                                                                                                                                                                                                                                                                                                                                                                                                                                                                             | 970                                          | 975            | 980                           | 985                                          | 990                                          | 995                                          | 1000                                         |
| D <sub>14</sub> V <sub>14</sub> C <sub>14</sub> A <sub>14</sub> E <sub>12</sub> K <sub>14</sub> L <sub>14</sub> K <sub>14</sub> D <sub>14</sub> K <sub>14</sub> G <sub>14</sub> F <sub>14</sub> P <sub>14</sub> V <sub>14</sub> I <sub>14</sub> K <sub>14</sub> V <sub>14</sub> D <sub>14</sub> G <sub>14</sub> S <sub>14</sub> N <sub>14</sub> F <sub>14</sub> S <sub>14</sub> K <sub>14</sub> N <sub>14</sub> T <sub>14</sub> E <sub>14</sub> V <sub>14</sub> Q <sub>14</sub> K <sub>14</sub> M <sub>14</sub> V <sub>14</sub> D <sub>14</sub> G <sub>14</sub> M <sub>13</sub> Q <sub>10</sub> G <sub>14</sub> E <sub>14</sub> V <sub>14</sub> K <sub>14</sub> |                                              |                |                               |                                              |                                              |                                              |                                              |
| S <sub>1</sub> D <sub>2</sub>                                                                                                                                                                                                                                                                                                                                                                                                                                                                                                                                                                                                                                   |                                              | M <sub>1</sub> | R <sub>3</sub>                |                                              |                                              | E <sub>4</sub> L <sub>1</sub> R <sub>3</sub> |                                              |
|                                                                                                                                                                                                                                                                                                                                                                                                                                                                                                                                                                                                                                                                 |                                              |                |                               |                                              |                                              | A <sub>2</sub> K <sub>1</sub>                |                                              |
|                                                                                                                                                                                                                                                                                                                                                                                                                                                                                                                                                                                                                                                                 |                                              |                |                               |                                              |                                              | M <sub>1</sub>                               |                                              |
| 1005                                                                                                                                                                                                                                                                                                                                                                                                                                                                                                                                                                                                                                                            | 1010                                         | 1015           | 1020                          | 1025                                         | 1030                                         | 1035                                         | 1040                                         |
| F <sub>14</sub> I <sub>12</sub> V <sub>14</sub> A <sub>14</sub> T <sub>14</sub> N <sub>14</sub> I <sub>14</sub> I <sub>14</sub> E <sub>14</sub> N <sub>14</sub> G <sub>14</sub> V <sub>14</sub> T <sub>14</sub> L <sub>14</sub> D <sub>14</sub> V <sub>14</sub> D <sub>14</sub> V <sub>14</sub> V <sub>13</sub> D <sub>14</sub> F <sub>14</sub> G <sub>14</sub> E <sub>14</sub> R <sub>14</sub> M <sub>14</sub> S <sub>14</sub> P <sub>14</sub> N <sub>14</sub> L <sub>14</sub> C <sub>14</sub> S <sub>14</sub> E <sub>14</sub> D <sub>13</sub> S <sub>14</sub> C <sub>14</sub> I <sub>14</sub> L <sub>14</sub> M <sub>14</sub> Q <sub>14</sub>                 |                                              |                |                               |                                              |                                              |                                              |                                              |
| M <sub>2</sub>                                                                                                                                                                                                                                                                                                                                                                                                                                                                                                                                                                                                                                                  |                                              |                | I <sub>1</sub>                |                                              |                                              | E <sub>1</sub>                               |                                              |
| 1045                                                                                                                                                                                                                                                                                                                                                                                                                                                                                                                                                                                                                                                            | 1050                                         | 1055           | 1060                          | 1065                                         | 1070                                         | 1075                                         | 1080                                         |
| S <sub>14</sub> Q <sub>14</sub> S <sub>14</sub> I <sub>14</sub> S <sub>14</sub> Q <sub>14</sub> A <sub>14</sub> E <sub>14</sub> S <sub>14</sub> K <sub>14</sub> Q <sub>14</sub> S <sub>14</sub> F <sub>14</sub> G <sub>14</sub> S <sub>14</sub> V <sub>14</sub> G <sub>14</sub> S <sub>14</sub> M <sub>14</sub> K <sub>14</sub> S <sub>14</sub> G <sub>14</sub> S <sub>14</sub> V <sub>14</sub> Y <sub>14</sub> K <sub>14</sub> F <sub>14</sub> G <sub>14</sub> S <sub>14</sub> E <sub>12</sub> T <sub>14</sub> L <sub>14</sub> P <sub>14</sub> D <sub>14</sub> S <sub>14</sub> M <sub>14</sub> S <sub>14</sub> S <sub>9</sub> S <sub>14</sub> V <sub>14</sub>  |                                              |                |                               |                                              |                                              |                                              |                                              |
|                                                                                                                                                                                                                                                                                                                                                                                                                                                                                                                                                                                                                                                                 |                                              |                | K <sub>1</sub>                |                                              | D <sub>2</sub>                               | N <sub>5</sub>                               |                                              |
| 1085                                                                                                                                                                                                                                                                                                                                                                                                                                                                                                                                                                                                                                                            | 1090                                         | 1095           | 1100                          | 1105                                         | 1110                                         | 1115                                         | 1120                                         |
| G <sub>14</sub> S <sub>14</sub> T <sub>14</sub> E <sub>14</sub> S <sub>14</sub> A <sub>14</sub> L <sub>14</sub> I <sub>14</sub> C <sub>14</sub> F <sub>14</sub> A <sub>14</sub> Y <sub>14</sub> G <sub>14</sub> L <sub>14</sub> K <sub>14</sub> P <sub>14</sub> V <sub>14</sub> V <sub>14</sub> D <sub>14</sub> D <sub>14</sub> V <sub>14</sub> D <sub>14</sub> M <sub>14</sub> G <sub>14</sub> S <sub>14</sub> V <sub>14</sub> S <sub>14</sub> S <sub>13</sub> V <sub>14</sub> T <sub>14</sub> Q <sub>14</sub> S <sub>14</sub> Q <sub>14</sub> A <sub>14</sub> L <sub>14</sub> T <sub>14</sub> A <sub>14</sub> S <sub>14</sub> M <sub>14</sub> F <sub>14</sub> |                                              |                |                               |                                              |                                              |                                              |                                              |
|                                                                                                                                                                                                                                                                                                                                                                                                                                                                                                                                                                                                                                                                 |                                              |                |                               |                                              | G <sub>1</sub>                               |                                              |                                              |

|                                                                                                                                                                                                                                                                                                                                                                                                                                                                                                                                                                                                                          |                                              |                               |                               |                               |                               |                                              |                |
|--------------------------------------------------------------------------------------------------------------------------------------------------------------------------------------------------------------------------------------------------------------------------------------------------------------------------------------------------------------------------------------------------------------------------------------------------------------------------------------------------------------------------------------------------------------------------------------------------------------------------|----------------------------------------------|-------------------------------|-------------------------------|-------------------------------|-------------------------------|----------------------------------------------|----------------|
| 1125                                                                                                                                                                                                                                                                                                                                                                                                                                                                                                                                                                                                                     | 1130                                         | 1135                          | 1140                          | 1145                          | 1150                          | 1155                                         | 1160           |
| E <sub>1</sub> A <sub>1</sub> N <sub>1</sub> Y <sub>1</sub> M <sub>1</sub> F <sub>1</sub> T <sub>1</sub> A <sub>1</sub> H <sub>1</sub> L <sub>1</sub> V <sub>1</sub> D <sub>1</sub> K <sub>1</sub> Q <sub>1</sub> G <sub>1</sub> F <sub>1</sub> M <sub>1</sub> P <sub>1</sub> S <sub>1</sub> P <sub>1</sub> V <sub>1</sub> F <sub>1</sub> E <sub>1</sub> L <sub>1</sub> M <sub>1</sub> K <sub>1</sub> N <sub>1</sub> L <sub>1</sub> L <sub>1</sub> L <sub>1</sub> H <sub>1</sub> T <sub>1</sub> D <sub>1</sub> A <sub>1</sub> V <sub>1</sub> G <sub>1</sub> V <sub>1</sub> S <sub>1</sub> S <sub>1</sub> T <sub>1</sub>  |                                              |                               |                               |                               |                               |                                              |                |
|                                                                                                                                                                                                                                                                                                                                                                                                                                                                                                                                                                                                                          | T <sub>1</sub>                               |                               |                               | S <sub>1</sub>                |                               | I <sub>1</sub>                               |                |
| 1165                                                                                                                                                                                                                                                                                                                                                                                                                                                                                                                                                                                                                     | 1170                                         | 1175                          | 1180                          | 1185                          | 1190                          | 1195                                         | 1200           |
| Y <sub>1</sub> L <sub>1</sub> A <sub>1</sub> T <sub>1</sub> N <sub>1</sub> M <sub>1</sub> S <sub>1</sub> G <sub>1</sub> W <sub>1</sub> S <sub>1</sub> S <sub>1</sub> L <sub>1</sub> K <sub>1</sub> E <sub>1</sub> Y <sub>1</sub> I <sub>1</sub> S <sub>1</sub> I <sub>1</sub> D <sub>1</sub> D <sub>1</sub> S <sub>1</sub> S <sub>1</sub> R <sub>1</sub> H <sub>1</sub> V <sub>1</sub> Q <sub>1</sub> E <sub>1</sub> V <sub>1</sub> Q <sub>1</sub> I <sub>1</sub> P <sub>1</sub> W <sub>1</sub> Y <sub>1</sub> C <sub>1</sub> S <sub>1</sub> D <sub>1</sub> M <sub>1</sub> S <sub>1</sub> D <sub>1</sub> D <sub>1</sub>  |                                              |                               |                               |                               |                               |                                              |                |
|                                                                                                                                                                                                                                                                                                                                                                                                                                                                                                                                                                                                                          | K <sub>1</sub>                               | V <sub>1</sub> K <sub>2</sub> | N <sub>1</sub>                | I <sub>1</sub>                |                               |                                              |                |
| 1205                                                                                                                                                                                                                                                                                                                                                                                                                                                                                                                                                                                                                     | 1210                                         | 1215                          | 1220                          | 1225                          | 1230                          | 1235                                         | 1240           |
| F <sub>1</sub> I <sub>1</sub> V <sub>1</sub> K <sub>1</sub> L <sub>1</sub> A <sub>1</sub> E <sub>1</sub> C <sub>1</sub> V <sub>1</sub> K <sub>1</sub> A <sub>1</sub> A <sub>1</sub> K <sub>1</sub> P <sub>1</sub> K <sub>1</sub> S <sub>1</sub> Q <sub>1</sub> C <sub>1</sub> G <sub>1</sub> Y <sub>1</sub> K <sub>1</sub> V <sub>1</sub> D <sub>1</sub> N <sub>1</sub> V <sub>1</sub> D <sub>1</sub> F <sub>1</sub> H <sub>1</sub> T <sub>1</sub> V <sub>1</sub> A <sub>1</sub> H <sub>1</sub> K <sub>1</sub> M <sub>1</sub> S <sub>1</sub> V <sub>1</sub> G <sub>1</sub> E <sub>1</sub> S <sub>1</sub> N <sub>1</sub>  |                                              |                               |                               |                               |                               |                                              |                |
| I <sub>2</sub>                                                                                                                                                                                                                                                                                                                                                                                                                                                                                                                                                                                                           |                                              |                               |                               | L <sub>2</sub>                |                               | M <sub>1</sub>                               |                |
| 1245                                                                                                                                                                                                                                                                                                                                                                                                                                                                                                                                                                                                                     | 1250                                         | 1255                          | 1260                          | 1265                          | 1270                          | 1275                                         | 1280           |
| M <sub>1</sub> D <sub>1</sub> E <sub>1</sub> S <sub>1</sub> S <sub>1</sub> A <sub>1</sub> L <sub>1</sub> V <sub>1</sub> A <sub>1</sub> T <sub>1</sub> I <sub>1</sub> L <sub>1</sub> D <sub>1</sub> E <sub>1</sub> V <sub>1</sub> K <sub>1</sub> Q <sub>1</sub> W <sub>1</sub> S <sub>1</sub> D <sub>1</sub> G <sub>1</sub> I <sub>1</sub> T <sub>1</sub> Y <sub>1</sub> H <sub>1</sub> S <sub>1</sub> S <sub>1</sub> T <sub>1</sub> P <sub>1</sub> S <sub>1</sub> N <sub>1</sub> K <sub>1</sub> S <sub>1</sub> L <sub>1</sub> M <sub>1</sub> S <sub>1</sub> L <sub>1</sub> M <sub>1</sub> V <sub>1</sub> G <sub>1</sub>  |                                              |                               |                               |                               |                               |                                              |                |
| R <sub>1</sub>                                                                                                                                                                                                                                                                                                                                                                                                                                                                                                                                                                                                           | S <sub>1</sub>                               |                               |                               |                               |                               |                                              |                |
| 1285                                                                                                                                                                                                                                                                                                                                                                                                                                                                                                                                                                                                                     | 1290                                         | 1295                          | 1300                          | 1305                          | 1310                          | 1315                                         | 1320           |
| W <sub>1</sub> I <sub>1</sub> P <sub>1</sub> S <sub>1</sub> K <sub>1</sub> A <sub>1</sub> E <sub>1</sub> K <sub>1</sub> T <sub>1</sub> K <sub>1</sub> E <sub>1</sub> I <sub>1</sub> L <sub>1</sub> D <sub>1</sub> N <sub>1</sub> R <sub>1</sub> I <sub>1</sub> Q <sub>1</sub> R <sub>1</sub> L <sub>1</sub> E <sub>1</sub> L <sub>1</sub> L <sub>1</sub> N <sub>1</sub> Q <sub>1</sub> L <sub>1</sub> N <sub>1</sub> G <sub>1</sub> V <sub>1</sub> S <sub>1</sub> G <sub>1</sub> I <sub>1</sub> D <sub>1</sub> D <sub>1</sub> Y <sub>1</sub> E <sub>1</sub> S <sub>1</sub> L <sub>1</sub> V <sub>1</sub>                 |                                              |                               |                               |                               |                               |                                              |                |
|                                                                                                                                                                                                                                                                                                                                                                                                                                                                                                                                                                                                                          | S <sub>2</sub> V <sub>2</sub>                |                               |                               |                               |                               | V <sub>1</sub>                               |                |
| 1325                                                                                                                                                                                                                                                                                                                                                                                                                                                                                                                                                                                                                     | 1330                                         | 1335                          | 1340                          | 1345                          | 1350                          | 1355                                         | 1360           |
| R <sub>1</sub> F <sub>1</sub> F <sub>1</sub> S <sub>1</sub> E <sub>1</sub> N <sub>1</sub> P <sub>1</sub> H <sub>1</sub> S <sub>1</sub> A <sub>1</sub> E <sub>1</sub> Y <sub>1</sub> L <sub>1</sub> E <sub>1</sub> S <sub>1</sub> Q <sub>1</sub> C <sub>1</sub> A <sub>1</sub> S <sub>1</sub> D <sub>1</sub> Y <sub>1</sub> I <sub>1</sub> E <sub>1</sub> E <sub>1</sub> K <sub>1</sub> V <sub>1</sub> M <sub>1</sub> S <sub>1</sub> V <sub>1</sub> K <sub>1</sub> S <sub>1</sub> N <sub>1</sub> Y <sub>1</sub> D <sub>1</sub> K <sub>1</sub> S <sub>1</sub> L <sub>1</sub> I <sub>1</sub> L <sub>1</sub> G <sub>1</sub>  |                                              |                               |                               |                               |                               |                                              |                |
|                                                                                                                                                                                                                                                                                                                                                                                                                                                                                                                                                                                                                          |                                              |                               |                               | N <sub>2</sub>                | S <sub>2</sub>                | P <sub>2</sub> M <sub>1</sub> M <sub>1</sub> |                |
| 1365                                                                                                                                                                                                                                                                                                                                                                                                                                                                                                                                                                                                                     | 1370                                         | 1375                          | 1380                          | 1385                          | 1390                          | 1395                                         | 1400           |
| M <sub>1</sub> V <sub>1</sub> G <sub>1</sub> L <sub>1</sub> A <sub>1</sub> V <sub>1</sub> A <sub>1</sub> T <sub>1</sub> G <sub>1</sub> T <sub>1</sub> F <sub>1</sub> A <sub>1</sub> Y <sub>1</sub> W <sub>1</sub> Y <sub>1</sub> M <sub>1</sub> S <sub>1</sub> S <sub>1</sub> S <sub>1</sub> A <sub>1</sub> A <sub>1</sub> V <sub>1</sub> E <sub>1</sub> L <sub>1</sub> V <sub>1</sub> E <sub>1</sub> K <sub>1</sub> Q <sub>1</sub> A <sub>1</sub> K <sub>1</sub> H <sub>1</sub> K <sub>1</sub> Y <sub>1</sub> N <sub>1</sub> S <sub>1</sub> D <sub>1</sub> K <sub>1</sub> R <sub>1</sub> T <sub>1</sub> G <sub>1</sub>  |                                              |                               |                               |                               |                               |                                              |                |
| V <sub>1</sub>                                                                                                                                                                                                                                                                                                                                                                                                                                                                                                                                                                                                           |                                              |                               | D <sub>1</sub> M <sub>1</sub> |                               |                               |                                              | S <sub>2</sub> |
| 1405                                                                                                                                                                                                                                                                                                                                                                                                                                                                                                                                                                                                                     | 1410                                         | 1415                          | 1420                          | 1425                          | 1430                          | 1435                                         | 1440           |
| S <sub>1</sub> L <sub>1</sub> M <sub>1</sub> F <sub>1</sub> D <sub>1</sub> M <sub>1</sub> D <sub>1</sub> Q <sub>1</sub> E <sub>1</sub> T <sub>1</sub> Y <sub>1</sub> E <sub>1</sub> N <sub>1</sub> F <sub>1</sub> G <sub>1</sub> P <sub>1</sub> E <sub>1</sub> Y <sub>1</sub> T <sub>1</sub> D <sub>1</sub> D <sub>1</sub> V <sub>1</sub> I <sub>1</sub> S <sub>1</sub> A <sub>1</sub> K <sub>1</sub> M <sub>1</sub> T <sub>1</sub> K <sub>1</sub> A <sub>1</sub> Q <sub>1</sub> K <sub>1</sub> E <sub>1</sub> S <sub>1</sub> D <sub>1</sub> S <sub>1</sub> K <sub>1</sub> K <sub>1</sub> K <sub>1</sub>                 |                                              |                               |                               |                               |                               |                                              |                |
| L <sub>2</sub> E <sub>2</sub>                                                                                                                                                                                                                                                                                                                                                                                                                                                                                                                                                                                            | S <sub>1</sub>                               | S <sub>2</sub>                | A <sub>2</sub>                | M <sub>3</sub> G <sub>1</sub> | A <sub>1</sub>                | E <sub>2</sub> S <sub>1</sub>                |                |
|                                                                                                                                                                                                                                                                                                                                                                                                                                                                                                                                                                                                                          |                                              |                               | S <sub>2</sub>                |                               |                               |                                              |                |
| 1445                                                                                                                                                                                                                                                                                                                                                                                                                                                                                                                                                                                                                     | 1450                                         | 1455                          | 1460                          | 1465                          | 1470                          | 1475                                         | 1480           |
| G <sub>1</sub> W <sub>1</sub> K <sub>1</sub> A <sub>1</sub> G <sub>1</sub> K <sub>1</sub> M <sub>1</sub> N <sub>1</sub> R <sub>1</sub> P <sub>1</sub> M <sub>1</sub> S <sub>1</sub> V <sub>1</sub> F <sub>1</sub> H <sub>1</sub> Q <sub>1</sub> L <sub>1</sub> Y <sub>1</sub> G <sub>1</sub> V <sub>1</sub> N <sub>1</sub> P <sub>1</sub> L <sub>1</sub> E <sub>1</sub> F <sub>1</sub> D <sub>1</sub> E <sub>1</sub> V <sub>1</sub> V <sub>1</sub> M <sub>1</sub> S <sub>1</sub> V <sub>1</sub> G <sub>1</sub> K <sub>1</sub> L <sub>1</sub> E <sub>1</sub> T <sub>1</sub> E <sub>1</sub> P <sub>1</sub> W <sub>1</sub>  |                                              |                               |                               |                               |                               |                                              |                |
|                                                                                                                                                                                                                                                                                                                                                                                                                                                                                                                                                                                                                          | V <sub>4</sub>                               | I <sub>1</sub>                |                               |                               | I <sub>2</sub> R <sub>2</sub> | A <sub>1</sub>                               |                |
| 1485                                                                                                                                                                                                                                                                                                                                                                                                                                                                                                                                                                                                                     | 1490                                         | 1495                          | 1500                          | 1505                          | 1510                          | 1515                                         | 1520           |
| D <sub>1</sub> V <sub>1</sub> K <sub>1</sub> E <sub>1</sub> L <sub>1</sub> N <sub>1</sub> V <sub>1</sub> D <sub>1</sub> A <sub>1</sub> M <sub>1</sub> M <sub>1</sub> I <sub>1</sub> E <sub>1</sub> L <sub>1</sub> D <sub>1</sub> D <sub>1</sub> Y <sub>1</sub> H <sub>1</sub> I <sub>1</sub> L <sub>1</sub> R <sub>1</sub> D <sub>1</sub> D <sub>1</sub> R <sub>1</sub> M <sub>1</sub> F <sub>1</sub> G <sub>1</sub> K <sub>1</sub> K <sub>1</sub> V <sub>1</sub> S <sub>1</sub> L <sub>1</sub> A <sub>1</sub> F <sub>1</sub> K <sub>1</sub> K <sub>1</sub> E <sub>1</sub> G <sub>1</sub> A <sub>1</sub>                 |                                              |                               |                               |                               |                               |                                              |                |
|                                                                                                                                                                                                                                                                                                                                                                                                                                                                                                                                                                                                                          | I <sub>1</sub> G <sub>1</sub> G <sub>2</sub> | L <sub>2</sub>                |                               | S <sub>2</sub> Y <sub>1</sub> | T <sub>2</sub>                | S <sub>3</sub>                               | S <sub>2</sub> |
| 1525                                                                                                                                                                                                                                                                                                                                                                                                                                                                                                                                                                                                                     | 1530                                         | 1535                          | 1540                          | 1545                          | 1550                          | 1555                                         | 1560           |
| D <sub>10</sub> E <sub>1</sub> E <sub>1</sub> T <sub>1</sub> I <sub>1</sub> V <sub>1</sub> N <sub>1</sub> L <sub>1</sub> T <sub>1</sub> P <sub>1</sub> H <sub>1</sub> R <sub>1</sub> S <sub>1</sub> K <sub>1</sub> M <sub>1</sub> A <sub>1</sub> S <sub>1</sub> S <sub>1</sub> M <sub>1</sub> S <sub>1</sub> L <sub>1</sub> A <sub>1</sub> P <sub>1</sub> M <sub>1</sub> G <sub>1</sub> F <sub>1</sub> P <sub>1</sub> E <sub>1</sub> E <sub>1</sub> E <sub>1</sub> G <sub>1</sub> S <sub>1</sub> W <sub>1</sub> S <sub>1</sub> Q <sub>1</sub> T <sub>1</sub> G <sub>1</sub> A <sub>1</sub> P <sub>1</sub> L <sub>1</sub> |                                              |                               |                               |                               |                               |                                              |                |
| H <sub>2</sub>                                                                                                                                                                                                                                                                                                                                                                                                                                                                                                                                                                                                           | S <sub>1</sub>                               | T <sub>5</sub>                |                               |                               |                               |                                              | V <sub>3</sub> |
| G <sub>1</sub>                                                                                                                                                                                                                                                                                                                                                                                                                                                                                                                                                                                                           |                                              |                               |                               |                               |                               |                                              | M <sub>1</sub> |
| N <sub>1</sub>                                                                                                                                                                                                                                                                                                                                                                                                                                                                                                                                                                                                           |                                              |                               |                               |                               |                               |                                              |                |
| 1565                                                                                                                                                                                                                                                                                                                                                                                                                                                                                                                                                                                                                     | 1570                                         | 1575                          | 1580                          | 1585                          | 1590                          | 1595                                         | 1600           |
| M <sub>1</sub> K <sub>1</sub> K <sub>1</sub> I <sub>1</sub> K <sub>1</sub> E <sub>1</sub> D <sub>1</sub> E <sub>1</sub> V <sub>1</sub> E <sub>1</sub> V <sub>1</sub> Q <sub>1</sub> V <sub>1</sub> A <sub>1</sub> K <sub>1</sub> P <sub>1</sub> E <sub>1</sub> P <sub>1</sub> T <sub>1</sub> N <sub>1</sub> P <sub>1</sub> Y <sub>1</sub> D <sub>1</sub> H <sub>1</sub> I <sub>1</sub> L <sub>1</sub> V <sub>1</sub> S <sub>1</sub> L <sub>1</sub> G <sub>1</sub> S <sub>1</sub> A <sub>1</sub> H <sub>1</sub> L <sub>1</sub> G <sub>1</sub> T <sub>1</sub> R <sub>1</sub> V <sub>1</sub> L <sub>1</sub>                 |                                              |                               |                               |                               |                               |                                              |                |
| V <sub>2</sub> S <sub>3</sub>                                                                                                                                                                                                                                                                                                                                                                                                                                                                                                                                                                                            | T <sub>1</sub> E <sub>4</sub> N <sub>2</sub> | E <sub>2</sub> I <sub>2</sub> | L <sub>1</sub>                | V <sub>2</sub>                |                               | R <sub>1</sub>                               |                |
| T <sub>1</sub> Q <sub>1</sub>                                                                                                                                                                                                                                                                                                                                                                                                                                                                                                                                                                                            | S <sub>2</sub> T <sub>2</sub>                |                               | S <sub>1</sub>                |                               |                               |                                              |                |
| 1605                                                                                                                                                                                                                                                                                                                                                                                                                                                                                                                                                                                                                     | 1610                                         | 1615                          | 1620                          | 1625                          | 1630                          | 1635                                         | 1640           |
| N <sub>1</sub> C <sub>1</sub> F <sub>1</sub> F <sub>1</sub> H <sub>1</sub> G <sub>1</sub> S <sub>1</sub> K <sub>1</sub> C <sub>1</sub> V <sub>1</sub> I <sub>1</sub> P <sub>1</sub> Y <sub>1</sub> H <sub>1</sub> L <sub>1</sub> A <sub>1</sub> E <sub>1</sub> K <sub>1</sub> G <sub>1</sub> D <sub>1</sub> S <sub>1</sub> E <sub>1</sub> E <sub>1</sub> S <sub>1</sub> L <sub>1</sub> V <sub>1</sub> I <sub>1</sub> A <sub>1</sub> T <sub>1</sub> T <sub>1</sub> S <sub>1</sub> G <sub>1</sub> Q <sub>1</sub> F <sub>1</sub> D <sub>1</sub> F <sub>1</sub> G <sub>1</sub> P <sub>1</sub> M <sub>1</sub> K <sub>1</sub>  |                                              |                               |                               |                               |                               |                                              |                |
|                                                                                                                                                                                                                                                                                                                                                                                                                                                                                                                                                                                                                          | A <sub>1</sub>                               | I <sub>1</sub>                |                               | P <sub>2</sub> I <sub>1</sub> |                               | L <sub>1</sub> E <sub>1</sub>                |                |
|                                                                                                                                                                                                                                                                                                                                                                                                                                                                                                                                                                                                                          | T <sub>1</sub>                               |                               |                               |                               |                               |                                              |                |
| 1645                                                                                                                                                                                                                                                                                                                                                                                                                                                                                                                                                                                                                     | 1650                                         | 1655                          | 1660                          | 1665                          | 1670                          | 1675                                         | 1680           |
| N <sub>1</sub> I <sub>1</sub> K <sub>1</sub> C <sub>1</sub> S <sub>1</sub> K <sub>1</sub> I <sub>1</sub> T <sub>1</sub> D <sub>1</sub> Y <sub>1</sub> D <sub>1</sub> I <sub>1</sub> T <sub>1</sub> L <sub>1</sub> C <sub>1</sub> P <sub>1</sub> L <sub>1</sub> P <sub>1</sub> N <sub>1</sub> D <sub>1</sub> V <sub>1</sub> Q <sub>1</sub> P <sub>1</sub> F <sub>1</sub> R <sub>1</sub> S <sub>1</sub> K <sub>1</sub> I <sub>1</sub> V <sub>1</sub> M <sub>1</sub> R <sub>1</sub> E <sub>1</sub> P <sub>1</sub> K <sub>1</sub> L <sub>1</sub> G <sub>1</sub> E <sub>1</sub> E <sub>1</sub> V <sub>1</sub> V <sub>1</sub>  |                                              |                               |                               |                               |                               |                                              |                |
|                                                                                                                                                                                                                                                                                                                                                                                                                                                                                                                                                                                                                          | K <sub>2</sub> V <sub>7</sub>                | V <sub>3</sub>                | S <sub>1</sub>                | A <sub>1</sub>                |                               |                                              |                |
|                                                                                                                                                                                                                                                                                                                                                                                                                                                                                                                                                                                                                          |                                              | M <sub>1</sub>                |                               |                               |                               |                                              |                |
| 1685                                                                                                                                                                                                                                                                                                                                                                                                                                                                                                                                                                                                                     | 1690                                         | 1695                          | 1700                          | 1705                          | 1710                          | 1715                                         | 1720           |
| I <sub>1</sub> V <sub>1</sub> C <sub>1</sub> F <sub>1</sub> T <sub>1</sub> S <sub>1</sub> I <sub>1</sub> N <sub>1</sub> G <sub>1</sub> K <sub>1</sub> I <sub>1</sub> V <sub>1</sub> M <sub>1</sub> K <sub>1</sub> V <sub>1</sub> S <sub>1</sub> D <sub>1</sub> K <sub>1</sub> S <sub>1</sub> T <sub>1</sub> T <sub>1</sub> Y <sub>1</sub> P <sub>1</sub> A <sub>1</sub> G <sub>1</sub> G <sub>1</sub> Q <sub>1</sub> F <sub>1</sub> A <sub>1</sub> H <sub>1</sub> L <sub>1</sub> W <sub>1</sub> A <sub>1</sub> Y <sub>1</sub> K <sub>1</sub> Y <sub>1</sub> D <sub>1</sub> G <sub>1</sub> Q <sub>1</sub> P <sub>1</sub>  |                                              |                               |                               |                               |                               |                                              |                |
| Y <sub>2</sub> A <sub>2</sub>                                                                                                                                                                                                                                                                                                                                                                                                                                                                                                                                                                                            |                                              | A <sub>1</sub>                | A <sub>2</sub>                |                               |                               | N <sub>3</sub>                               |                |
| 1725                                                                                                                                                                                                                                                                                                                                                                                                                                                                                                                                                                                                                     | 1730                                         | 1735                          | 1740                          | 1745                          | 1750                          | 1755                                         | 1760           |
| G <sub>1</sub> D <sub>1</sub> C <sub>1</sub> G <sub>1</sub> P <sub>1</sub> I <sub>1</sub> V <sub>1</sub> A <sub>1</sub> T <sub>1</sub> V <sub>1</sub> D <sub>1</sub> Q <sub>1</sub> K <sub>1</sub> V <sub>1</sub> V <sub>1</sub> G <sub>1</sub> F <sub>1</sub> H <sub>1</sub> S <sub>1</sub> G <sub>1</sub> V <sub>1</sub> I <sub>1</sub> S <sub>1</sub> N <sub>1</sub> S <sub>1</sub> S <sub>1</sub> E <sub>1</sub> E <sub>1</sub> K <sub>1</sub> L <sub>1</sub> R <sub>1</sub> A <sub>1</sub> V <sub>1</sub> Y <sub>1</sub> T <sub>1</sub> P <sub>1</sub> V <sub>1</sub> N <sub>1</sub> Q <sub>1</sub>                 |                                              |                               |                               |                               |                               |                                              |                |
|                                                                                                                                                                                                                                                                                                                                                                                                                                                                                                                                                                                                                          |                                              |                               |                               |                               |                               |                                              | G <sub>3</sub> |



|                                                                                                                                                                                                                                                                                                                                                                                                                                                                                                                                                                                                                                                                 |      |      |      |      |      |      |      |
|-----------------------------------------------------------------------------------------------------------------------------------------------------------------------------------------------------------------------------------------------------------------------------------------------------------------------------------------------------------------------------------------------------------------------------------------------------------------------------------------------------------------------------------------------------------------------------------------------------------------------------------------------------------------|------|------|------|------|------|------|------|
| 1765                                                                                                                                                                                                                                                                                                                                                                                                                                                                                                                                                                                                                                                            | 1770 | 1775 | 1780 | 1785 | 1790 | 1795 | 1800 |
| E <sub>1</sub> L <sub>1</sub> L <sub>12</sub> N <sub>14</sub> C <sub>12</sub> I <sub>10</sub> S <sub>18</sub> G <sub>12</sub> D <sub>14</sub> T <sub>14</sub> Q <sub>14</sub> M <sub>14</sub> T <sub>14</sub> D <sub>14</sub> F <sub>14</sub> W <sub>14</sub> T <sub>14</sub> F <sub>14</sub> N <sub>14</sub> P <sub>14</sub> D <sub>14</sub> L <sub>14</sub> V <sub>14</sub> E <sub>14</sub> W <sub>14</sub> N <sub>14</sub> S <sub>14</sub> V <sub>14</sub> A <sub>14</sub> S <sub>14</sub> V <sub>14</sub> S <sub>14</sub> T <sub>14</sub> F <sub>14</sub> F <sub>14</sub> P <sub>14</sub> M <sub>14</sub> T <sub>14</sub> K <sub>14</sub> A <sub>14</sub>   |      |      |      |      |      |      |      |
| M <sub>2</sub> Y <sub>2</sub> V <sub>4</sub> S <sub>2</sub>                                                                                                                                                                                                                                                                                                                                                                                                                                                                                                                                                                                                     |      |      |      |      |      |      |      |
| 1805                                                                                                                                                                                                                                                                                                                                                                                                                                                                                                                                                                                                                                                            | 1810 | 1815 | 1820 | 1825 | 1830 | 1835 | 1840 |
| T <sub>1</sub> N <sub>14</sub> T <sub>14</sub> I <sub>12</sub> T <sub>14</sub> V <sub>14</sub> Q <sub>14</sub> A <sub>14</sub> N <sub>14</sub> E <sub>14</sub> G <sub>14</sub> E <sub>14</sub> E <sub>14</sub> L <sub>13</sub> T <sub>14</sub> D <sub>14</sub> G <sub>14</sub> N <sub>14</sub> L <sub>14</sub> M <sub>14</sub> I <sub>12</sub> V <sub>14</sub> G <sub>14</sub> Y <sub>14</sub> V <sub>14</sub> N <sub>14</sub> R <sub>14</sub> E <sub>14</sub> V <sub>14</sub> Y <sub>14</sub> H <sub>14</sub> N <sub>14</sub> H <sub>14</sub> V <sub>13</sub> I <sub>14</sub> K <sub>14</sub> G <sub>14</sub> K <sub>12</sub> S <sub>14</sub> E <sub>14</sub>  |      |      |      |      |      |      |      |
| M <sub>2</sub> D <sub>3</sub> S <sub>1</sub> M <sub>2</sub> I <sub>1</sub> S <sub>2</sub>                                                                                                                                                                                                                                                                                                                                                                                                                                                                                                                                                                       |      |      |      |      |      |      |      |
| 1845                                                                                                                                                                                                                                                                                                                                                                                                                                                                                                                                                                                                                                                            | 1850 | 1855 | 1860 | 1865 | 1870 | 1875 | 1880 |
| S <sub>1</sub> F <sub>14</sub> M <sub>10</sub> S <sub>13</sub> Y <sub>14</sub> C <sub>14</sub> E <sub>14</sub> Q <sub>14</sub> F <sub>14</sub> P <sub>14</sub> N <sub>12</sub> C <sub>14</sub> A <sub>14</sub> F <sub>14</sub> T <sub>14</sub> K <sub>14</sub> E <sub>12</sub> L <sub>13</sub> R <sub>12</sub> D <sub>14</sub> Q <sub>14</sub> Y <sub>14</sub> L <sub>14</sub> P <sub>14</sub> S <sub>14</sub> I <sub>11</sub> L <sub>14</sub> S <sub>14</sub> K <sub>14</sub> P <sub>14</sub> A <sub>14</sub> F <sub>14</sub> S <sub>14</sub> K <sub>14</sub> G <sub>14</sub> L <sub>14</sub> L <sub>14</sub> K <sub>14</sub> Y <sub>14</sub> N <sub>14</sub>  |      |      |      |      |      |      |      |
| T <sub>4</sub> K <sub>1</sub> S <sub>2</sub> D <sub>2</sub> S <sub>2</sub> K <sub>1</sub> V <sub>3</sub>                                                                                                                                                                                                                                                                                                                                                                                                                                                                                                                                                        |      |      |      |      |      |      |      |
| 1885                                                                                                                                                                                                                                                                                                                                                                                                                                                                                                                                                                                                                                                            | 1890 | 1895 | 1900 | 1905 | 1910 | 1915 | 1920 |
| E <sub>14</sub> P <sub>14</sub> V <sub>14</sub> R <sub>13</sub> V <sub>14</sub> G <sub>14</sub> S <sub>10</sub> V <sub>14</sub> N <sub>10</sub> F <sub>14</sub> P <sub>9</sub> C <sub>14</sub> L <sub>13</sub> M <sub>12</sub> R <sub>14</sub> A <sub>14</sub> Y <sub>14</sub> L <sub>14</sub> K <sub>12</sub> V <sub>14</sub> E <sub>14</sub> E <sub>8</sub> M <sub>14</sub> F <sub>14</sub> E <sub>13</sub> N <sub>6</sub> L <sub>11</sub> G <sub>14</sub> F <sub>14</sub> L <sub>12</sub> K <sub>7</sub> E <sub>14</sub> A <sub>14</sub> G <sub>14</sub> P <sub>14</sub> Q <sub>14</sub> W <sub>14</sub> D <sub>14</sub> P <sub>14</sub> I <sub>14</sub>     |      |      |      |      |      |      |      |
| Q <sub>1</sub> L <sub>4</sub> M <sub>2</sub> D <sub>4</sub> S <sub>5</sub> I <sub>2</sub> N <sub>2</sub> G <sub>4</sub> K <sub>1</sub> D <sub>4</sub> R <sub>2</sub> E <sub>5</sub>                                                                                                                                                                                                                                                                                                                                                                                                                                                                             |      |      |      |      |      |      |      |
| L <sub>1</sub> T <sub>2</sub> A <sub>2</sub> G <sub>2</sub>                                                                                                                                                                                                                                                                                                                                                                                                                                                                                                                                                                                                     |      |      |      |      |      |      |      |
| 1925                                                                                                                                                                                                                                                                                                                                                                                                                                                                                                                                                                                                                                                            | 1930 | 1935 | 1940 | 1945 | 1950 | 1955 | 1960 |
| E <sub>14</sub> I <sub>14</sub> L <sub>14</sub> E <sub>9</sub> D <sub>14</sub> L <sub>14</sub> N <sub>14</sub> K <sub>14</sub> K <sub>14</sub> A <sub>14</sub> A <sub>14</sub> M <sub>14</sub> G <sub>14</sub> A <sub>14</sub> L <sub>14</sub> Y <sub>14</sub> Q <sub>14</sub> G <sub>14</sub> K <sub>14</sub> K <sub>14</sub> Q <sub>14</sub> D <sub>14</sub> W <sub>14</sub> L <sub>13</sub> K <sub>14</sub> S <sub>14</sub> M <sub>12</sub> E <sub>14</sub> P <sub>14</sub> A <sub>13</sub> D <sub>14</sub> F <sub>14</sub> I <sub>14</sub> T <sub>10</sub> A <sub>14</sub> V <sub>14</sub> R <sub>14</sub> E <sub>14</sub> S <sub>14</sub> F <sub>14</sub>  |      |      |      |      |      |      |      |
| D <sub>5</sub> F <sub>1</sub> I <sub>2</sub> V <sub>1</sub> M <sub>4</sub>                                                                                                                                                                                                                                                                                                                                                                                                                                                                                                                                                                                      |      |      |      |      |      |      |      |
| 1965                                                                                                                                                                                                                                                                                                                                                                                                                                                                                                                                                                                                                                                            | 1970 | 1975 | 1980 | 1985 | 1990 | 1995 | 2000 |
| K <sub>14</sub> H <sub>14</sub> L <sub>14</sub> A <sub>14</sub> G <sub>14</sub> G <sub>14</sub> D <sub>14</sub> V <sub>14</sub> G <sub>14</sub> I <sub>14</sub> W <sub>14</sub> S <sub>14</sub> G <sub>14</sub> S <sub>14</sub> L <sub>14</sub> K <sub>14</sub> A <sub>14</sub> E <sub>14</sub> L <sub>14</sub> S <sub>14</sub> P <sub>12</sub> V <sub>12</sub> E <sub>10</sub> K <sub>14</sub> V <sub>14</sub> L <sub>14</sub> E <sub>14</sub> Q <sub>14</sub> K <sub>14</sub> T <sub>14</sub> S <sub>14</sub> V <sub>14</sub> F <sub>14</sub> T <sub>14</sub> G <sub>14</sub> A <sub>14</sub> P <sub>14</sub> I <sub>14</sub> D <sub>14</sub> L <sub>14</sub> |      |      |      |      |      |      |      |
| T <sub>1</sub> I <sub>2</sub> K <sub>4</sub> R <sub>2</sub>                                                                                                                                                                                                                                                                                                                                                                                                                                                                                                                                                                                                     |      |      |      |      |      |      |      |
| S <sub>1</sub>                                                                                                                                                                                                                                                                                                                                                                                                                                                                                                                                                                                                                                                  |      |      |      |      |      |      |      |
| 2005                                                                                                                                                                                                                                                                                                                                                                                                                                                                                                                                                                                                                                                            | 2010 | 2015 | 2020 | 2025 | 2030 | 2035 | 2040 |
| L <sub>14</sub> L <sub>14</sub> G <sub>14</sub> K <sub>14</sub> I <sub>12</sub> L <sub>12</sub> V <sub>14</sub> D <sub>14</sub> N <sub>14</sub> F <sub>14</sub> N <sub>14</sub> H <sub>14</sub> F <sub>14</sub> F <sub>14</sub> Y <sub>14</sub> F <sub>14</sub> N <sub>14</sub> H <sub>14</sub> L <sub>14</sub> K <sub>14</sub> G <sub>14</sub> P <sub>14</sub> W <sub>14</sub> T <sub>14</sub> V <sub>14</sub> G <sub>14</sub> I <sub>14</sub> N <sub>14</sub> K <sub>14</sub> F <sub>14</sub> N <sub>14</sub> K <sub>14</sub> G <sub>14</sub> W <sub>14</sub> D <sub>14</sub> S <sub>14</sub> L <sub>14</sub> A <sub>14</sub> S <sub>12</sub>                 |      |      |      |      |      |      |      |
| M <sub>2</sub> K <sub>2</sub>                                                                                                                                                                                                                                                                                                                                                                                                                                                                                                                                                                                                                                   |      |      |      |      |      |      |      |
| 2045                                                                                                                                                                                                                                                                                                                                                                                                                                                                                                                                                                                                                                                            | 2050 | 2055 | 2060 | 2065 | 2070 | 2075 | 2080 |
| Y <sub>13</sub> F <sub>14</sub> N <sub>12</sub> H <sub>14</sub> S <sub>12</sub> W <sub>14</sub> N <sub>14</sub> F <sub>14</sub> M <sub>13</sub> D <sub>14</sub> C <sub>14</sub> D <sub>14</sub> G <sub>14</sub> S <sub>14</sub> S <sub>14</sub> F <sub>14</sub> D <sub>14</sub> T <sub>14</sub> S <sub>14</sub> L <sub>14</sub> A <sub>14</sub> P <sub>14</sub> I <sub>14</sub> L <sub>14</sub> F <sub>14</sub> Q <sub>14</sub> L <sub>14</sub> V <sub>14</sub> C <sub>14</sub> H <sub>14</sub> M <sub>14</sub> R <sub>14</sub> E <sub>14</sub> K <sub>14</sub> F <sub>14</sub> G <sub>14</sub> N <sub>14</sub> F <sub>14</sub> D <sub>14</sub> D <sub>14</sub> |      |      |      |      |      |      |      |
| N <sub>1</sub> D <sub>2</sub> N <sub>2</sub> T <sub>1</sub>                                                                                                                                                                                                                                                                                                                                                                                                                                                                                                                                                                                                     |      |      |      |      |      |      |      |
| 2085                                                                                                                                                                                                                                                                                                                                                                                                                                                                                                                                                                                                                                                            | 2090 | 2095 | 2100 | 2105 | 2110 | 2115 | 2120 |
| T <sub>1</sub> E <sub>14</sub> S <sub>14</sub> A <sub>14</sub> A <sub>14</sub> L <sub>14</sub> R <sub>14</sub> N <sub>14</sub> L <sub>14</sub> Y <sub>14</sub> T <sub>14</sub> Q <sub>14</sub> M <sub>14</sub> V <sub>14</sub> Y <sub>14</sub> T <sub>14</sub> P <sub>14</sub> I <sub>14</sub> L <sub>14</sub> T <sub>14</sub> I <sub>14</sub> D <sub>14</sub> G <sub>14</sub> Y <sub>14</sub> T <sub>14</sub> T <sub>8</sub> K <sub>14</sub> K <sub>14</sub> H <sub>14</sub> R <sub>14</sub> G <sub>14</sub> N <sub>14</sub> N <sub>14</sub> S <sub>14</sub> G <sub>14</sub> Q <sub>14</sub> P <sub>14</sub> S <sub>14</sub> T <sub>14</sub> V <sub>14</sub>   |      |      |      |      |      |      |      |
| V <sub>1</sub> K <sub>2</sub> T <sub>2</sub> A <sub>4</sub> M <sub>1</sub> V <sub>1</sub>                                                                                                                                                                                                                                                                                                                                                                                                                                                                                                                                                                       |      |      |      |      |      |      |      |
| 2125                                                                                                                                                                                                                                                                                                                                                                                                                                                                                                                                                                                                                                                            | 2130 | 2135 | 2140 | 2145 | 2150 | 2155 | 2160 |
| V <sub>14</sub> D <sub>14</sub> N <sub>14</sub> T <sub>14</sub> I <sub>12</sub> M <sub>14</sub> L <sub>14</sub> M <sub>14</sub> I <sub>14</sub> V <sub>14</sub> V <sub>14</sub> E <sub>14</sub> Y <sub>14</sub> C <sub>14</sub> K <sub>14</sub> A <sub>14</sub> V <sub>14</sub> M <sub>14</sub> E <sub>14</sub> S <sub>12</sub> E <sub>14</sub> G <sub>14</sub> S <sub>14</sub> T <sub>4</sub> M <sub>14</sub> Q <sub>14</sub> F <sub>14</sub> K <sub>14</sub> Y <sub>14</sub> M <sub>14</sub> C <sub>14</sub> N <sub>14</sub> G <sub>14</sub> D <sub>14</sub> D <sub>14</sub> L <sub>14</sub> I <sub>14</sub> L <sub>14</sub> N <sub>14</sub> V <sub>14</sub>  |      |      |      |      |      |      |      |
| M <sub>2</sub> I <sub>3</sub> T <sub>2</sub> K <sub>1</sub> V <sub>4</sub> I <sub>2</sub> E <sub>2</sub> A <sub>2</sub> M <sub>2</sub>                                                                                                                                                                                                                                                                                                                                                                                                                                                                                                                          |      |      |      |      |      |      |      |
| 2165                                                                                                                                                                                                                                                                                                                                                                                                                                                                                                                                                                                                                                                            | 2170 | 2175 | 2180 | 2185 | 2190 | 2195 | 2200 |
| P <sub>14</sub> D <sub>12</sub> D <sub>14</sub> E <sub>14</sub> V <sub>14</sub> S <sub>12</sub> M <sub>14</sub> I <sub>14</sub> Q <sub>14</sub> S <sub>14</sub> S <sub>14</sub> F <sub>14</sub> S <sub>14</sub> E <sub>14</sub> L <sub>14</sub> F <sub>14</sub> S <sub>14</sub> E <sub>14</sub> C <sub>14</sub> G <sub>14</sub> L <sub>14</sub> D <sub>14</sub> Y <sub>14</sub> N <sub>13</sub> F <sub>14</sub> D <sub>14</sub> D <sub>14</sub> V <sub>14</sub> H <sub>14</sub> K <sub>14</sub> S <sub>14</sub> M <sub>14</sub> E <sub>14</sub> T <sub>14</sub> I <sub>14</sub> E <sub>14</sub> Y <sub>14</sub> M <sub>14</sub> S <sub>14</sub> H <sub>14</sub> |      |      |      |      |      |      |      |
| N <sub>2</sub> N <sub>2</sub> V <sub>1</sub> D <sub>2</sub> T <sub>1</sub>                                                                                                                                                                                                                                                                                                                                                                                                                                                                                                                                                                                      |      |      |      |      |      |      |      |
| N <sub>1</sub>                                                                                                                                                                                                                                                                                                                                                                                                                                                                                                                                                                                                                                                  |      |      |      |      |      |      |      |
| 2205                                                                                                                                                                                                                                                                                                                                                                                                                                                                                                                                                                                                                                                            | 2210 | 2215 | 2220 | 2225 | 2230 | 2235 | 2240 |
| S <sub>14</sub> F <sub>14</sub> M <sub>14</sub> L <sub>13</sub> K <sub>14</sub> D <sub>14</sub> G <sub>10</sub> V <sub>12</sub> Y <sub>14</sub> I <sub>14</sub> P <sub>14</sub> K <sub>14</sub> L <sub>14</sub> K <sub>14</sub> K <sub>12</sub> E <sub>14</sub> S <sub>14</sub> I <sub>14</sub> V <sub>14</sub> A <sub>14</sub> I <sub>14</sub> L <sub>13</sub> E <sub>14</sub> W <sub>14</sub> E <sub>14</sub> S <sub>14</sub> G <sub>14</sub> D <sub>14</sub> E <sub>14</sub> I <sub>11</sub> M <sub>14</sub> R <sub>12</sub> T <sub>14</sub> R <sub>12</sub> S <sub>14</sub> A <sub>14</sub> L <sub>14</sub> N <sub>14</sub> A <sub>14</sub> A <sub>14</sub> |      |      |      |      |      |      |      |
| M <sub>1</sub> D <sub>4</sub> L <sub>1</sub> S <sub>2</sub> V <sub>1</sub> M <sub>4</sub> S <sub>2</sub> S <sub>2</sub>                                                                                                                                                                                                                                                                                                                                                                                                                                                                                                                                         |      |      |      |      |      |      |      |
| M <sub>1</sub> M <sub>1</sub>                                                                                                                                                                                                                                                                                                                                                                                                                                                                                                                                                                                                                                   |      |      |      |      |      |      |      |
| 2245                                                                                                                                                                                                                                                                                                                                                                                                                                                                                                                                                                                                                                                            | 2250 | 2255 | 2260 | 2265 | 2270 | 2275 | 2280 |
| Y <sub>14</sub> I <sub>14</sub> E <sub>14</sub> S <sub>14</sub> Y <sub>14</sub> G <sub>14</sub> Y <sub>14</sub> E <sub>8</sub> D <sub>14</sub> L <sub>13</sub> M <sub>14</sub> V <sub>14</sub> E <sub>14</sub> I <sub>14</sub> E <sub>14</sub> R <sub>14</sub> Y <sub>14</sub> A <sub>14</sub> V <sub>14</sub> F <sub>14</sub> W <sub>14</sub> A <sub>14</sub> T <sub>8</sub> E <sub>13</sub> K <sub>14</sub> G <sub>14</sub> C <sub>14</sub> E <sub>14</sub> Y <sub>14</sub> P <sub>14</sub> L <sub>13</sub> L <sub>13</sub> D <sub>14</sub> S <sub>14</sub> K <sub>14</sub> R <sub>14</sub> V <sub>14</sub> E <sub>14</sub> G <sub>14</sub> L <sub>14</sub>   |      |      |      |      |      |      |      |
| D <sub>6</sub> P <sub>1</sub> I <sub>1</sub> T <sub>1</sub> M <sub>1</sub> A <sub>6</sub> G <sub>1</sub>                                                                                                                                                                                                                                                                                                                                                                                                                                                                                                                                                        |      |      |      |      |      |      |      |

|                                                                                                                                                                                                                                                                                                                                                                                                                                                                                                                                                                                                                                                                 |                |                                                                            |                               |                                              |                               |                               |                                                                                                                                                       |
|-----------------------------------------------------------------------------------------------------------------------------------------------------------------------------------------------------------------------------------------------------------------------------------------------------------------------------------------------------------------------------------------------------------------------------------------------------------------------------------------------------------------------------------------------------------------------------------------------------------------------------------------------------------------|----------------|----------------------------------------------------------------------------|-------------------------------|----------------------------------------------|-------------------------------|-------------------------------|-------------------------------------------------------------------------------------------------------------------------------------------------------|
| 2285                                                                                                                                                                                                                                                                                                                                                                                                                                                                                                                                                                                                                                                            | 2290           | 2295                                                                       | 2300                          | 2305                                         | 2310                          | 2315                          | 2320                                                                                                                                                  |
| Y <sub>14</sub> K <sub>10</sub> D <sub>14</sub> D <sub>14</sub> H <sub>11</sub> T <sub>14</sub> D <sub>14</sub> I <sub>11</sub> N <sub>14</sub> E <sub>14</sub> E <sub>14</sub> W <sub>14</sub> L <sub>14</sub> M <sub>6</sub> G <sub>14</sub> I <sub>14</sub> L <sub>14</sub> P <sub>14</sub> P <sub>14</sub> S <sub>14</sub> F <sub>14</sub> E <sub>14</sub> H <sub>14</sub> C <sub>14</sub> Y <sub>14</sub> V <sub>14</sub> D <sub>14</sub> T <sub>10</sub> Q <sub>14</sub> T <sub>13</sub> K <sub>12</sub> D <sub>14</sub> L <sub>12</sub> S <sub>13</sub> G <sub>8</sub> S <sub>9</sub> E <sub>12</sub> K <sub>10</sub> P <sub>12</sub> E <sub>14</sub>    |                |                                                                            |                               |                                              |                               |                               |                                                                                                                                                       |
| S <sub>4</sub>                                                                                                                                                                                                                                                                                                                                                                                                                                                                                                                                                                                                                                                  | Y <sub>2</sub> | V <sub>3</sub>                                                             |                               |                                              | M <sub>4</sub>                | I <sub>1</sub> E <sub>2</sub> | V <sub>2</sub> K <sub>1</sub> E <sub>4</sub> G <sub>2</sub> D <sub>2</sub> Q <sub>2</sub> L <sub>2</sub>                                              |
|                                                                                                                                                                                                                                                                                                                                                                                                                                                                                                                                                                                                                                                                 | N <sub>1</sub> | I <sub>2</sub>                                                             |                               |                                              |                               |                               | S <sub>2</sub> E <sub>2</sub> E <sub>2</sub>                                                                                                          |
|                                                                                                                                                                                                                                                                                                                                                                                                                                                                                                                                                                                                                                                                 |                | S <sub>2</sub>                                                             |                               |                                              |                               |                               | K <sub>1</sub>                                                                                                                                        |
|                                                                                                                                                                                                                                                                                                                                                                                                                                                                                                                                                                                                                                                                 |                | T <sub>1</sub>                                                             |                               |                                              |                               |                               |                                                                                                                                                       |
| 2325                                                                                                                                                                                                                                                                                                                                                                                                                                                                                                                                                                                                                                                            | 2330           | 2335                                                                       | 2340                          | 2345                                         | 2350                          | 2355                          | 2360                                                                                                                                                  |
| L <sub>13</sub> S <sub>13</sub> I <sub>3</sub> E <sub>12</sub> S <sub>13</sub> H <sub>10</sub> D <sub>13</sub> G <sub>11</sub> V <sub>6</sub> P <sub>5</sub> Q <sub>1</sub> M <sub>13</sub> Q <sub>1</sub> M <sub>14</sub> K <sub>14</sub> F <sub>14</sub> P <sub>14</sub> V <sub>14</sub> T <sub>14</sub> F <sub>14</sub> V <sub>14</sub> T <sub>14</sub> G <sub>14</sub> N <sub>14</sub> L <sub>12</sub> G <sub>14</sub> K <sub>14</sub> L <sub>13</sub> A <sub>14</sub> E <sub>14</sub> V <sub>14</sub> K <sub>13</sub> S <sub>14</sub> I <sub>4</sub> L <sub>14</sub> G <sub>14</sub> I <sub>3</sub> A <sub>13</sub> N <sub>11</sub> D <sub>14</sub>        |                |                                                                            |                               |                                              |                               |                               |                                                                                                                                                       |
| F <sub>1</sub> G <sub>1</sub> V <sub>3</sub> G <sub>2</sub> N <sub>1</sub> C <sub>2</sub> N <sub>1</sub> S <sub>3</sub> T <sub>6</sub> S <sub>5</sub> R <sub>3</sub> L <sub>1</sub>                                                                                                                                                                                                                                                                                                                                                                                                                                                                             |                |                                                                            |                               | F <sub>2</sub>                               |                               | S <sub>1</sub>                | S <sub>1</sub> S <sub>3</sub>                                                                                                                         |
| T <sub>3</sub>                                                                                                                                                                                                                                                                                                                                                                                                                                                                                                                                                                                                                                                  | Y <sub>2</sub> | A <sub>1</sub> L <sub>2</sub>                                              |                               |                                              |                               |                               |                                                                                                                                                       |
| P <sub>2</sub>                                                                                                                                                                                                                                                                                                                                                                                                                                                                                                                                                                                                                                                  |                | M <sub>1</sub> T <sub>2</sub>                                              |                               |                                              |                               |                               |                                                                                                                                                       |
| A <sub>1</sub>                                                                                                                                                                                                                                                                                                                                                                                                                                                                                                                                                                                                                                                  |                |                                                                            |                               |                                              |                               |                               |                                                                                                                                                       |
| 2365                                                                                                                                                                                                                                                                                                                                                                                                                                                                                                                                                                                                                                                            | 2370           | 2375                                                                       | 2380                          | 2385                                         | 2390                          | 2395                          | 2400                                                                                                                                                  |
| V <sub>14</sub> M <sub>9</sub> A <sub>14</sub> K <sub>8</sub> N <sub>14</sub> I <sub>14</sub> D <sub>14</sub> L <sub>14</sub> P <sub>14</sub> E <sub>14</sub> V <sub>14</sub> Q <sub>14</sub> G <sub>14</sub> T <sub>14</sub> P <sub>14</sub> D <sub>11</sub> E <sub>14</sub> I <sub>11</sub> V <sub>13</sub> S <sub>11</sub> K <sub>14</sub> K <sub>14</sub> A <sub>14</sub> Q <sub>14</sub> L <sub>13</sub> A <sub>14</sub> V <sub>14</sub> K <sub>14</sub> M <sub>14</sub> T <sub>14</sub> N <sub>14</sub> S <sub>12</sub> P <sub>14</sub> V <sub>14</sub> L <sub>14</sub> V <sub>14</sub> E <sub>14</sub> D <sub>14</sub> T <sub>13</sub> C <sub>14</sub>   |                |                                                                            |                               |                                              |                               |                               |                                                                                                                                                       |
| V <sub>5</sub> S <sub>5</sub>                                                                                                                                                                                                                                                                                                                                                                                                                                                                                                                                                                                                                                   |                |                                                                            | E <sub>2</sub>                | V <sub>1</sub> A <sub>1</sub> K <sub>2</sub> | F <sub>1</sub>                | G <sub>2</sub>                | A <sub>1</sub>                                                                                                                                        |
| R <sub>1</sub>                                                                                                                                                                                                                                                                                                                                                                                                                                                                                                                                                                                                                                                  |                |                                                                            | V <sub>1</sub>                | M <sub>1</sub>                               |                               |                               |                                                                                                                                                       |
| 2405                                                                                                                                                                                                                                                                                                                                                                                                                                                                                                                                                                                                                                                            | 2410           | 2415                                                                       | 2420                          | 2425                                         | 2430                          | 2435                          | 2440                                                                                                                                                  |
| L <sub>14</sub> C <sub>14</sub> F <sub>14</sub> N <sub>14</sub> A <sub>14</sub> F <sub>14</sub> N <sub>14</sub> G <sub>14</sub> L <sub>14</sub> P <sub>14</sub> G <sub>14</sub> P <sub>14</sub> Y <sub>14</sub> I <sub>13</sub> K <sub>14</sub> W <sub>14</sub> F <sub>14</sub> L <sub>14</sub> K <sub>14</sub> E <sub>14</sub> L <sub>14</sub> G <sub>14</sub> L <sub>14</sub> E <sub>8</sub> G <sub>14</sub> V <sub>14</sub> V <sub>14</sub> K <sub>12</sub> M <sub>14</sub> L <sub>14</sub> S <sub>11</sub> A <sub>14</sub> F <sub>14</sub> G <sub>8</sub> D <sub>14</sub> K <sub>14</sub> S <sub>14</sub> A <sub>14</sub> Y <sub>14</sub> A <sub>14</sub>   |                |                                                                            |                               |                                              |                               |                               |                                                                                                                                                       |
|                                                                                                                                                                                                                                                                                                                                                                                                                                                                                                                                                                                                                                                                 |                | M <sub>1</sub>                                                             |                               | D <sub>6</sub>                               | S <sub>2</sub>                |                               |                                                                                                                                                       |
|                                                                                                                                                                                                                                                                                                                                                                                                                                                                                                                                                                                                                                                                 |                |                                                                            |                               |                                              |                               | E <sub>4</sub>                |                                                                                                                                                       |
|                                                                                                                                                                                                                                                                                                                                                                                                                                                                                                                                                                                                                                                                 |                |                                                                            |                               |                                              |                               | S <sub>2</sub>                |                                                                                                                                                       |
| 2445                                                                                                                                                                                                                                                                                                                                                                                                                                                                                                                                                                                                                                                            | 2450           | 2455                                                                       | 2460                          | 2465                                         | 2470                          | 2475                          | 2480                                                                                                                                                  |
| L <sub>14</sub> C <sub>14</sub> T <sub>14</sub> F <sub>14</sub> A <sub>14</sub> Y <sub>14</sub> V <sub>13</sub> H <sub>11</sub> N <sub>13</sub> E <sub>14</sub> L <sub>7</sub> S <sub>14</sub> D <sub>13</sub> P <sub>14</sub> I <sub>11</sub> V <sub>14</sub> F <sub>14</sub> K <sub>14</sub> G <sub>14</sub> V <sub>14</sub> V <sub>14</sub> N <sub>13</sub> G <sub>14</sub> E <sub>14</sub> I <sub>14</sub> V <sub>14</sub> P <sub>14</sub> P <sub>14</sub> R <sub>14</sub> G <sub>14</sub> N <sub>14</sub> N <sub>14</sub> G <sub>14</sub> F <sub>14</sub> G <sub>14</sub> W <sub>14</sub> D <sub>14</sub> P <sub>14</sub> M <sub>9</sub> F <sub>14</sub>   |                |                                                                            |                               |                                              |                               |                               |                                                                                                                                                       |
|                                                                                                                                                                                                                                                                                                                                                                                                                                                                                                                                                                                                                                                                 | A <sub>1</sub> | S <sub>1</sub>                                                             | S <sub>7</sub>                | E <sub>1</sub>                               | V <sub>3</sub>                |                               |                                                                                                                                                       |
|                                                                                                                                                                                                                                                                                                                                                                                                                                                                                                                                                                                                                                                                 |                |                                                                            |                               |                                              |                               | K <sub>2</sub>                | I <sub>5</sub>                                                                                                                                        |
| 2485                                                                                                                                                                                                                                                                                                                                                                                                                                                                                                                                                                                                                                                            | 2490           | 2495                                                                       | 2500                          | 2505                                         | 2510                          | 2515                          | 2520                                                                                                                                                  |
| K <sub>14</sub> P <sub>14</sub> D <sub>14</sub> G <sub>9</sub> C <sub>14</sub> G <sub>14</sub> C <sub>14</sub> T <sub>14</sub> F <sub>14</sub> A <sub>14</sub> E <sub>14</sub> M <sub>14</sub> P <sub>9</sub> S <sub>14</sub> S <sub>11</sub> I <sub>11</sub> K <sub>14</sub> N <sub>13</sub> D <sub>13</sub> F <sub>14</sub> S <sub>14</sub> H <sub>14</sub> S <sub>14</sub> S <sub>14</sub> A <sub>14</sub> L <sub>13</sub> E <sub>14</sub> K <sub>14</sub> V <sub>14</sub> K <sub>14</sub> L <sub>11</sub> F <sub>10</sub> L <sub>14</sub> D <sub>14</sub> N <sub>14</sub> L <sub>14</sub> V <sub>10</sub> V <sub>14</sub> K <sub>12</sub>                   |                |                                                                            |                               |                                              |                               |                               |                                                                                                                                                       |
| E <sub>5</sub> S <sub>5</sub>                                                                                                                                                                                                                                                                                                                                                                                                                                                                                                                                                                                                                                   |                | S <sub>5</sub>                                                             | N <sub>2</sub> M <sub>3</sub> | E <sub>1</sub>                               | K <sub>1</sub>                | S <sub>3</sub> Y <sub>4</sub> | M <sub>4</sub> S <sub>2</sub>                                                                                                                         |
| E <sub>1</sub>                                                                                                                                                                                                                                                                                                                                                                                                                                                                                                                                                                                                                                                  |                |                                                                            | G <sub>1</sub> N <sub>1</sub> |                                              |                               |                               |                                                                                                                                                       |
| 2525                                                                                                                                                                                                                                                                                                                                                                                                                                                                                                                                                                                                                                                            | 2530           | 2535                                                                       | 2540                          | 2545                                         | 2550                          | 2555                          | 2560                                                                                                                                                  |
| Q <sub>14</sub> E <sub>14</sub> E <sub>12</sub> K <sub>12</sub> K <sub>14</sub> A <sub>14</sub> K <sub>7</sub> V <sub>14</sub> A <sub>14</sub> L <sub>14</sub> T <sub>14</sub> I <sub>14</sub> D <sub>12</sub> V <sub>14</sub> Q <sub>14</sub> A <sub>13</sub> L <sub>11</sub> N <sub>12</sub> Q <sub>14</sub> E <sub>14</sub> E <sub>14</sub> M <sub>9</sub> E <sub>14</sub> A <sub>12</sub> E <sub>14</sub> I <sub>11</sub> T <sub>12</sub> A <sub>14</sub> L <sub>11</sub> K <sub>14</sub> K <sub>14</sub> L <sub>13</sub> W <sub>14</sub> K <sub>9</sub> D <sub>14</sub> N <sub>14</sub> G <sub>14</sub> P <sub>14</sub> T <sub>14</sub> S <sub>13</sub>    |                |                                                                            |                               |                                              |                               |                               |                                                                                                                                                       |
| K <sub>2</sub> Q <sub>1</sub> S <sub>3</sub> T <sub>1</sub> S <sub>6</sub> M <sub>1</sub>                                                                                                                                                                                                                                                                                                                                                                                                                                                                                                                                                                       |                | E <sub>2</sub>                                                             | V <sub>1</sub> D <sub>2</sub> | V <sub>4</sub> E <sub>1</sub>                | A <sub>1</sub>                | M <sub>1</sub> S <sub>5</sub> | G <sub>1</sub>                                                                                                                                        |
| N <sub>1</sub>                                                                                                                                                                                                                                                                                                                                                                                                                                                                                                                                                                                                                                                  | G <sub>1</sub> |                                                                            |                               | I <sub>1</sub> T <sub>1</sub>                | S <sub>1</sub>                |                               |                                                                                                                                                       |
| 2565                                                                                                                                                                                                                                                                                                                                                                                                                                                                                                                                                                                                                                                            | 2570           | 2575                                                                       | 2580                          | 2585                                         | 2590                          | 2595                          | 2600                                                                                                                                                  |
| T <sub>14</sub> R <sub>14</sub> S <sub>14</sub> P <sub>12</sub> F <sub>14</sub> E <sub>14</sub> A <sub>14</sub> S <sub>13</sub> S <sub>14</sub> L <sub>14</sub> S <sub>14</sub> A <sub>14</sub> P <sub>12</sub> Q <sub>14</sub> V <sub>14</sub> E <sub>14</sub> R <sub>14</sub> V <sub>14</sub> N <sub>14</sub> E <sub>14</sub> L <sub>14</sub> L <sub>14</sub> Q <sub>14</sub> K <sub>12</sub> L <sub>14</sub> K <sub>14</sub> D <sub>13</sub> E <sub>14</sub> G <sub>14</sub> L <sub>14</sub> Q <sub>14</sub> T <sub>14</sub> K <sub>14</sub> K <sub>14</sub> S <sub>14</sub> P <sub>14</sub> C <sub>14</sub> G <sub>14</sub> E <sub>14</sub> P <sub>14</sub> |                |                                                                            |                               |                                              |                               |                               |                                                                                                                                                       |
| S <sub>2</sub>                                                                                                                                                                                                                                                                                                                                                                                                                                                                                                                                                                                                                                                  | K <sub>1</sub> | S <sub>2</sub>                                                             |                               | Q <sub>2</sub>                               | N <sub>1</sub>                |                               |                                                                                                                                                       |
| 2605                                                                                                                                                                                                                                                                                                                                                                                                                                                                                                                                                                                                                                                            | 2610           | 2615                                                                       | 2620                          | 2625                                         | 2630                          | 2635                          | 2640                                                                                                                                                  |
| D <sub>14</sub> D <sub>14</sub> G <sub>14</sub> E <sub>14</sub> V <sub>13</sub> V <sub>13</sub> D <sub>13</sub> D <sub>14</sub> D <sub>14</sub> S <sub>14</sub> D <sub>12</sub> D <sub>13</sub> G <sub>12</sub> N <sub>11</sub> N <sub>12</sub> Q <sub>14</sub> S <sub>14</sub> S <sub>13</sub> G <sub>12</sub> K <sub>14</sub> E <sub>12</sub> V <sub>12</sub> V <sub>8</sub> D <sub>12</sub> E <sub>14</sub> S <sub>11</sub> Q <sub>14</sub> N <sub>13</sub> N <sub>10</sub> Q <sub>12</sub> Q <sub>13</sub> P <sub>12</sub> S <sub>12</sub> K <sub>13</sub> P <sub>10</sub> K <sub>13</sub> F <sub>13</sub> K <sub>14</sub> I <sub>11</sub> S <sub>14</sub>  |                |                                                                            |                               |                                              |                               |                               |                                                                                                                                                       |
| M <sub>1</sub> M <sub>1</sub> V <sub>1</sub>                                                                                                                                                                                                                                                                                                                                                                                                                                                                                                                                                                                                                    |                | N <sub>2</sub> N <sub>1</sub> D <sub>1</sub> D <sub>3</sub> K <sub>1</sub> | F <sub>1</sub> E <sub>2</sub> | K <sub>2</sub>                               | I <sub>4</sub> H <sub>1</sub> | N <sub>2</sub>                | D <sub>1</sub> D <sub>4</sub> K <sub>2</sub> H <sub>1</sub> L <sub>1</sub> K <sub>2</sub> S <sub>1</sub> S <sub>2</sub> S <sub>1</sub> L <sub>1</sub> |
|                                                                                                                                                                                                                                                                                                                                                                                                                                                                                                                                                                                                                                                                 |                | E <sub>1</sub> D <sub>1</sub>                                              |                               |                                              | N <sub>1</sub> G <sub>1</sub> |                               | S <sub>1</sub> L <sub>1</sub>                                                                                                                         |
|                                                                                                                                                                                                                                                                                                                                                                                                                                                                                                                                                                                                                                                                 |                |                                                                            |                               |                                              |                               |                               | Q <sub>1</sub>                                                                                                                                        |
| 2645                                                                                                                                                                                                                                                                                                                                                                                                                                                                                                                                                                                                                                                            | 2650           | 2655                                                                       | 2660                          | 2665                                         | 2670                          | 2675                          | 2680                                                                                                                                                  |
| G <sub>14</sub> D <sub>14</sub> G <sub>13</sub> S <sub>10</sub> A <sub>10</sub> I <sub>9</sub> S <sub>12</sub> R <sub>14</sub> D <sub>14</sub> D <sub>14</sub> I <sub>14</sub> D <sub>14</sub> K <sub>13</sub> I <sub>11</sub> P <sub>14</sub> T <sub>14</sub> N <sub>13</sub> A <sub>14</sub> L <sub>11</sub> E <sub>14</sub> I <sub>14</sub> K <sub>14</sub> K <sub>14</sub> T <sub>14</sub> F <sub>14</sub> K <sub>14</sub> P <sub>14</sub> P <sub>14</sub> K <sub>10</sub> V <sub>14</sub> S <sub>14</sub> Q <sub>14</sub> S <sub>14</sub> A <sub>14</sub> Y <sub>14</sub> I <sub>14</sub> W <sub>14</sub> I <sub>10</sub> P <sub>14</sub> R <sub>14</sub>  |                |                                                                            |                               |                                              |                               |                               |                                                                                                                                                       |
| E <sub>1</sub> N <sub>3</sub> T <sub>4</sub> V <sub>5</sub> K <sub>2</sub>                                                                                                                                                                                                                                                                                                                                                                                                                                                                                                                                                                                      |                | S <sub>1</sub>                                                             | S <sub>1</sub>                |                                              |                               | S <sub>4</sub>                |                                                                                                                                                       |
| 2685                                                                                                                                                                                                                                                                                                                                                                                                                                                                                                                                                                                                                                                            | 2690           | 2695                                                                       | 2700                          | 2705                                         | 2710                          | 2715                          | 2720                                                                                                                                                  |
| S <sub>14</sub> Q <sub>14</sub> S <sub>14</sub> D <sub>14</sub> N <sub>14</sub> L <sub>11</sub> T <sub>14</sub> P <sub>14</sub> D <sub>14</sub> V <sub>14</sub> I <sub>13</sub> Q <sub>14</sub> N <sub>13</sub> F <sub>14</sub> L <sub>14</sub> A <sub>14</sub> Y <sub>14</sub> M <sub>10</sub> P <sub>14</sub> P <sub>14</sub> S <sub>14</sub> H <sub>13</sub> A <sub>14</sub> M <sub>14</sub> D <sub>14</sub> N <sub>14</sub> Q <sub>14</sub> L <sub>13</sub> A <sub>14</sub> S <sub>14</sub> G <sub>14</sub> I <sub>14</sub> E <sub>14</sub> V <sub>14</sub> E <sub>14</sub> N <sub>14</sub> W <sub>14</sub> A <sub>14</sub> I <sub>14</sub> E <sub>14</sub> |                |                                                                            |                               |                                              |                               |                               |                                                                                                                                                       |
|                                                                                                                                                                                                                                                                                                                                                                                                                                                                                                                                                                                                                                                                 |                | M <sub>1</sub> S <sub>1</sub>                                              | V <sub>4</sub>                | Y <sub>1</sub>                               |                               | V <sub>1</sub>                | V <sub>2</sub>                                                                                                                                        |
|                                                                                                                                                                                                                                                                                                                                                                                                                                                                                                                                                                                                                                                                 |                |                                                                            |                               |                                              |                               |                               | M <sub>1</sub>                                                                                                                                        |
| 2725                                                                                                                                                                                                                                                                                                                                                                                                                                                                                                                                                                                                                                                            | 2730           | 2735                                                                       | 2740                          | 2745                                         | 2750                          | 2755                          | 2760                                                                                                                                                  |
| V <sub>14</sub> A <sub>14</sub> K <sub>14</sub> A <sub>14</sub> Y <sub>14</sub> G <sub>14</sub> V <sub>14</sub> N <sub>14</sub> M <sub>14</sub> Q <sub>14</sub> E <sub>14</sub> F <sub>14</sub> Y <sub>14</sub> R <sub>13</sub> T <sub>14</sub> V <sub>10</sub> L <sub>11</sub> P <sub>14</sub> A <sub>14</sub> W <sub>14</sub> M <sub>10</sub> V <sub>14</sub> N <sub>14</sub> C <sub>14</sub> M <sub>14</sub> V <sub>14</sub> N <sub>14</sub> G <sub>14</sub> T <sub>14</sub> S <sub>10</sub> D <sub>14</sub> E <sub>14</sub> S <sub>14</sub> K <sub>14</sub> N <sub>14</sub> E <sub>14</sub> K <sub>14</sub> S <sub>14</sub> W <sub>14</sub> R <sub>14</sub> |                |                                                                            |                               |                                              |                               |                               |                                                                                                                                                       |
|                                                                                                                                                                                                                                                                                                                                                                                                                                                                                                                                                                                                                                                                 |                |                                                                            | H <sub>1</sub>                | I <sub>3</sub>                               |                               |                               |                                                                                                                                                       |
|                                                                                                                                                                                                                                                                                                                                                                                                                                                                                                                                                                                                                                                                 |                |                                                                            |                               | I <sub>4</sub>                               |                               |                               |                                                                                                                                                       |
| 2765                                                                                                                                                                                                                                                                                                                                                                                                                                                                                                                                                                                                                                                            | 2770           | 2775                                                                       | 2780                          | 2785                                         | 2790                          | 2795                          | 2800                                                                                                                                                  |
| A <sub>14</sub> V <sub>14</sub> E <sub>14</sub> L <sub>13</sub> N <sub>14</sub> S <sub>14</sub> Q <sub>14</sub> G <sub>14</sub> E <sub>14</sub> D <sub>14</sub> V <sub>14</sub> D <sub>14</sub> D <sub>14</sub> F <sub>14</sub> E <sub>14</sub> Y <sub>14</sub> P <sub>14</sub> M <sub>14</sub> E <sub>14</sub> P <sub>14</sub> M <sub>14</sub> Y <sub>14</sub> K <sub>13</sub> F <sub>14</sub> A <sub>14</sub> L <sub>14</sub> P <sub>14</sub> T <sub>14</sub> M <sub>14</sub> S <sub>14</sub> K <sub>14</sub> V <sub>11</sub> M <sub>14</sub> S <sub>14</sub> N <sub>14</sub> F <sub>14</sub> S <sub>14</sub> S <sub>14</sub> Q <sub>14</sub> A <sub>14</sub> |                |                                                                            |                               |                                              |                               |                               |                                                                                                                                                       |
|                                                                                                                                                                                                                                                                                                                                                                                                                                                                                                                                                                                                                                                                 |                |                                                                            |                               | S <sub>1</sub>                               |                               | I <sub>3</sub>                |                                                                                                                                                       |
